# Supplementary material for: Plasma proteomics link menopause timing to brain aging and dementia risk
Source: medRxiv preprint, doi:10.64898/2026.04.23.26351500, version 1 (2026-04-24)
Supplement: Extended data tables [file 351500_file08.xlsx]

## Sheet: S1. UKB demos
Table S1. Demographics of UKB participants, overall and stratified by tertile of age at menopause.
	Whole sample	Stratified by age at menopause
Variable		Earlier (<49)	Average (49-52)	Later (>52)	p	SMD
N	15012	4202	6382	4428
Age, mean (SD) years	60.65 (5.06)	60.46 (5.55)	60.18 (5.24)	61.52 (4.12)	<0.001	0.184
Years of education, mean (SD)	13.97 (2.09)	13.90 (2.06)	14.01 (2.10)	13.99 (2.09)	0.069	0.034
Ethnicity, N (%)					<0.001	0.14
African	100 (0.7)	34 (0.8)	47 (0.7)	19 (0.4)
Any other Asian background	36 (0.2)	14 (0.3)	12 (0.2)	10 (0.2)
Any other Black background	4 (0.0)	1 (0.0)	1 (0.0)	2 (0.0)
Any other mixed background	21 (0.1)	6 (0.1)	11 (0.2)	4 (0.1)
Any other white background	504 (3.4)	135 (3.2)	225 (3.5)	144 (3.3)
Bangladeshi	5 (0.0)	3 (0.1)	2 (0.0)	0 (0.0)
Black or Black British	1 (0.0)	1 (0.0)	0 (0.0)	0 (0.0)
British	13391 (89.2)	3682 (87.6)	5690 (89.2)	4019 (90.8)
Caribbean	101 (0.7)	37 (0.9)	37 (0.6)	27 (0.6)
Chinese	36 (0.2)	15 (0.4)	13 (0.2)	8 (0.2)
Do not know	8 (0.1)	2 (0.0)	2 (0.0)	4 (0.1)
Indian	162 (1.1)	73 (1.7)	58 (0.9)	31 (0.7)
Irish	376 (2.5)	103 (2.5)	176 (2.8)	97 (2.2)
Mixed	1 (0.0)	1 (0.0)	0 (0.0)	0 (0.0)
Other ethnic group	135 (0.9)	49 (1.2)	62 (1.0)	24 (0.5)
Pakistani	23 (0.2)	8 (0.2)	3 (0.0)	12 (0.3)
Prefer not to answer	37 (0.2)	14 (0.3)	10 (0.2)	13 (0.3)
White	14 (0.1)	2 (0.0)	6 (0.1)	6 (0.1)
White and Asian	24 (0.2)	6 (0.1)	15 (0.2)	3 (0.1)
White and Black African	17 (0.1)	9 (0.2)	7 (0.1)	1 (0.0)
White and Black Caribbean	16 (0.1)	7 (0.2)	5 (0.1)	4 (0.1)
Age at menopause, mean (SD) years	50.14 (4.65)	44.37 (3.81)	50.62 (1.03)	54.94 (1.77)	<0.001	2.927
History of hormone therapy, N (%)					<0.001	0.182
No	8134 (54.3)	1890 (45.2)	3739 (58.7)	2505 (56.7)
Yes	6840 (45.7)	2296 (54.8)	2632 (41.3)	1912 (43.3)
Surgical menopause, N (%)					<0.001	0.167
No	14407 (97.3)	3849 (94.3)	6210 (98.2)	4348 (98.8)
Yes	397 (2.7)	231 (5.7)	113 (1.8)	53 (1.2)
Number of live births, mean (SD)	1.90 (1.19)	1.83 (1.20)	1.89 (1.21)	2.00 (1.14)	<0.001	0.097
Oral contraceptives ever, N (%)					0.13	0.023
No	3459 (23.1)	991 (23.7)	1419 (22.3)	1049 (23.7)
Yes	11518 (76.9)	3199 (76.3)	4948 (77.7)	3371 (76.3)
Stillbirth, miscarriage or termination ever, N (%)					0.79	0.009
No	10201 (68.9)	2872 (69.3)	4323 (68.7)	3006 (68.8)
Yes	4606 (31.1)	1272 (30.7)	1971 (31.3)	1363 (31.2)
BMI, mean (SD)	27.14 (5.07)	27.30 (5.32)	26.95 (4.98)	27.28 (4.94)	<0.001	0.046
Systolic blood pressure, mean (SD)	140.46 (20.21)	139.75 (20.60)	139.85 (20.04)	141.98 (20.00)	<0.001	0.074
Diastolic blood pressure, mean (SD)	81.05 (10.53)	80.72 (10.63)	80.91 (10.46)	81.56 (10.51)	0.001	0.053
hbA1C, mean (SD) mmol/mol	36.76 (6.24)	37.10 (6.20)	36.53 (6.46)	36.79 (5.92)	<0.001	0.061
LDL cholesterol, mean (SD) mmol/L	3.74 (0.88)	3.68 (0.90)	3.75 (0.87)	3.78 (0.88)	<0.001	0.077
Smoking , N (%)					<0.001	0.146
Current	1170 (7.8)	447 (10.6)	487 (7.6)	236 (5.3)
Never	8631 (57.5)	2237 (53.2)	3704 (58.0)	2690 (60.7)
Prefer not to answer	53 (0.4)	17 (0.4)	19 (0.3)	17 (0.4)
Previous	5158 (34.4)	1501 (35.7)	2172 (34.0)	1485 (33.5)
High blood pressure, N (%)					0.012	0.037
No	10781 (71.8)	2996 (71.3)	4661 (73.0)	3124 (70.6)
Yes	4230 (28.2)	1206 (28.7)	1720 (27.0)	1304 (29.4)
Stroke, N (%)					<0.001	0.055
No	14800 (98.6)	4117 (98.0)	6300 (98.7)	4383 (99.0)
Yes	211 (1.4)	85 (2.0)	81 (1.3)	45 (1.0)
Angina, N (%)					0.003	0.041
No	14625 (97.4)	4064 (96.7)	6236 (97.7)	4325 (97.7)
Yes	386 (2.6)	138 (3.3)	145 (2.3)	103 (2.3)
Heart attack, N (%)					0.004	0.041
No	14849 (98.9)	4138 (98.5)	6321 (99.1)	4390 (99.1)
Yes	162 (1.1)	64 (1.5)	60 (0.9)	38 (0.9)
Diabetes ever, N (%)					<0.001	0.051
No	14328 (95.6)	3965 (94.6)	6130 (96.2)	4233 (95.7)
Yes	660 (4.4)	228 (5.4)	244 (3.8)	188 (4.3)
Broken bones in last 5 years, N (%)					0.02	0.036
No	13219 (88.4)	3649 (87.2)	5637 (88.7)	3933 (89.0)
Yes	1742 (11.6)	536 (12.8)	718 (11.3)	488 (11.0)
Cancer ever, N (%)					<0.001	0.056
No	13416 (89.6)	3681 (87.9)	5735 (90.1)	4000 (90.5)
Yes	1558 (10.4)	506 (12.1)	633 (9.9)	419 (9.5)
APOE4 carrier, N (%)					0.93	0.005
No	9075 (70.9)	2509 (71.0)	3894 (71.1)	2672 (70.7)
Yes	3719 (29.1)	1027 (29.0)	1585 (28.9)	1107 (29.3)

## Sheet: S2. UKB menoage main
Table S2. Results of linear models testing associations of age at menopause with proteins in UKB, adjusted for chronological age.
protein	beta	p	FDR p
GDF15	-0.010978	4.75948e-39	1.38691e-35
PLAUR	-0.00584	3.67157e-25	5.34947e-22
LAMP3	-0.0110056	3.04958e-23	2.96216e-20
WFDC2	-0.00793387	9.01397e-23	6.56668e-20
CXCL17	-0.00905888	7.40909e-22	4.31802e-19
ALPP	-0.0222754	1.34542e-20	6.53424e-18
LGALS4	-0.00983171	2.97497e-20	1.23844e-17
PRSS8	-0.00768623	2.50429e-19	9.12186e-17
TNFRSF10A	-0.00588198	2.90264e-18	9.39809e-16
OMD	0.00751251	8.52594e-18	2.48446e-15
FABP1	-0.016256	2.41862e-17	6.40713e-15
TNFSF13B	-0.00460382	2.91324e-17	7.07433e-15
FAP	0.00446786	6.01378e-17	1.34801e-14
EDA2R	-0.00595717	6.87375e-17	1.43072e-14
IGFBP4	-0.00727509	1.37877e-16	2.67849e-14
AREG	-0.00690435	7.45157e-16	1.34655e-13
VSIG4	-0.00683131	7.85567e-16	1.34655e-13
FSTL3	-0.00552939	1.23718e-15	2.00286e-13
CHI3L1	-0.0121606	2.31965e-15	3.55761e-13
TFF2	-0.00905338	2.54107e-15	3.70234e-13
REG4	-0.00762224	2.97077e-15	4.1223e-13
HAVCR2	-0.00562202	1.78437e-14	2.29448e-12
PIGR	-0.00576771	1.81102e-14	2.29448e-12
MSLN	-0.00901272	1.9144e-14	2.3244e-12
TNR	0.00666842	2.39081e-14	2.78673e-12
TFF1	-0.012233	3.11157e-14	3.48735e-12
COL1A1	0.00388859	4.1335e-14	4.33023e-12
SPON2	-0.005338	4.25937e-14	4.33023e-12
FGF21	-0.0181569	4.31165e-14	4.33023e-12
ADM	-0.00461187	4.45802e-14	4.33023e-12
REG3A	-0.00933296	6.06269e-14	5.69892e-12
WFIKKN2	0.00548621	8.00219e-14	7.287e-12
TNFRSF1A	-0.00457967	1.28981e-13	1.13894e-11
TNFRSF11A	-0.00594002	1.77117e-13	1.518e-11
TFF3	-0.00617937	2.0318e-13	1.69162e-11
ACVRL1	-0.00375008	2.56736e-13	2.07813e-11
IL1RN	-0.00916755	3.01764e-13	2.3766e-11
NECTIN2	-0.00424308	3.72791e-13	2.85872e-11
TNFRSF12A	-0.00502747	5.06295e-13	3.78293e-11
NPDC1	-0.00455733	8.0689e-13	5.80808e-11
FSHB	-0.00882341	8.43932e-13	5.80808e-11
ICAM1	-0.00416722	8.46181e-13	5.80808e-11
CD302	-0.0044561	8.57061e-13	5.80808e-11
TREM2	-0.0072464	1.41625e-12	9.37942e-11
COLEC12	-0.00379487	3.3647e-12	2.17883e-10
LGALS9	-0.00487273	3.63783e-12	2.30449e-10
CDCP1	-0.00688171	4.06113e-12	2.4871e-10
CSF1	-0.00386374	4.09681e-12	2.4871e-10
TNFRSF1B	-0.00522818	4.31253e-12	2.56463e-10
IL15	-0.00454473	4.5811e-12	2.66986e-10
EFEMP1	-0.00435904	4.8217e-12	2.75499e-10
CCL15	-0.0060479	5.25752e-12	2.94623e-10
WFIKKN1	0.00569309	6.9956e-12	3.84626e-10
CST3	-0.00408194	1.01331e-11	5.46815e-10
AGRN	-0.00471979	1.06863e-11	5.6618e-10
PTPRN2	-0.00441965	1.35755e-11	7.06409e-10
SOST	0.0051654	1.38639e-11	7.0876e-10
ASGR1	-0.00423347	1.46842e-11	7.37757e-10
CXCL16	-0.00327912	1.659e-11	8.19379e-10
APOF	0.00376851	1.92892e-11	9.36811e-10
CHCHD10	-0.00540807	2.58739e-11	1.23601e-09
TNFRSF10B	-0.0055076	2.86301e-11	1.34561e-09
LILRA5	-0.0044404	2.99936e-11	1.38732e-09
RNASE6	-0.00409571	3.47225e-11	1.58096e-09
FASLG	0.00488403	4.66163e-11	2.07197e-09
SPINK1	-0.00550693	4.69287e-11	2.07197e-09
MMP12	-0.00704349	4.7674e-11	2.07346e-09
SPINK6	-0.00714887	5.56776e-11	2.35202e-09
LRP11	-0.00476131	5.5693e-11	2.35202e-09
RBP2	-0.0100629	5.68594e-11	2.36697e-09
TGFA	-0.00617002	7.65909e-11	3.14346e-09
FABP4	-0.00789362	8.69858e-11	3.52051e-09
NECTIN4	-0.00396934	9.52705e-11	3.80299e-09
FGFR2	-0.00281747	9.95018e-11	3.91822e-09
FAM3C	-0.00380313	1.18194e-10	4.59223e-09
CGA	0.00782114	1.36488e-10	5.23324e-09
SIGLEC1	-0.00568671	1.77802e-10	6.72875e-09
OCLN	-0.00568556	1.86273e-10	6.92762e-09
IL1RAP	0.00564862	1.87811e-10	6.92762e-09
TIMP1	-0.00368691	2.14927e-10	7.82873e-09
CD27	-0.00526275	2.45901e-10	8.84635e-09
MSMB	-0.00915326	2.6435e-10	9.3941e-09
CTSD	-0.00522726	3.05446e-10	1.07237e-08
CHAD	0.00653645	4.91997e-10	1.70676e-08
HGF	-0.00454568	5.31126e-10	1.82083e-08
CD83	-0.00427869	5.43116e-10	1.84028e-08
ANGPT2	-0.00458606	6.83946e-10	2.29082e-08
RELT	-0.00349091	7.64079e-10	2.53014e-08
CTSZ	-0.0039173	7.93981e-10	2.53202e-08
GAL	0.00762803	7.9712e-10	2.53202e-08
MZB1	-0.00656221	7.97779e-10	2.53202e-08
LAIR1	-0.00491775	7.99402e-10	2.53202e-08
FOLR2	-0.00371446	8.59816e-10	2.69409e-08
TNFRSF14	-0.00373025	9.75284e-10	3.02338e-08
CD59	-0.00290094	1.11088e-09	3.40749e-08
CNTN5	0.00467531	1.20228e-09	3.59711e-08
CA6	0.00783899	1.20318e-09	3.59711e-08
TGFBR2	-0.00408054	1.20974e-09	3.59711e-08
SPINK4	-0.00802778	1.26998e-09	3.7381e-08
LY6D	-0.00457223	1.31547e-09	3.83327e-08
AMBP	-0.00248556	1.33383e-09	3.8483e-08
TNFRSF6B	-0.00684128	1.71096e-09	4.88798e-08
DCBLD2	-0.00408725	2.2652e-09	6.40853e-08
RNASET2	-0.00318598	2.45991e-09	6.89247e-08
CRELD1	-0.00463131	2.49677e-09	6.92912e-08
CAPG	-0.00697855	2.89541e-09	7.95964e-08
ADAMTS13	0.00269288	3.22945e-09	8.79497e-08
CLEC5A	-0.00344225	3.29274e-09	8.8843e-08
CCL7	-0.00729015	3.39499e-09	9.07616e-08
PIK3IP1	-0.00317328	3.56604e-09	9.44676e-08
STC1	-0.005084	4.01859e-09	1.05497e-07
UMOD	0.00660616	4.73992e-09	1.23323e-07
ADAMTS15	-0.005676	4.89064e-09	1.26118e-07
CKAP4	-0.00314581	6.55188e-09	1.67475e-07
CDH3	0.00409545	6.69465e-09	1.69637e-07
CD300E	-0.00493285	8.11435e-09	2.03838e-07
CA4	-0.00275339	8.36621e-09	2.08369e-07
LGALS1	-0.00412151	8.59104e-09	2.12155e-07
CSTB	-0.00497715	1.08475e-08	2.65058e-07
EPHA1	-0.00406633	1.09152e-08	2.65058e-07
THY1	-0.00341823	1.10338e-08	2.65723e-07
TNFRSF4	-0.00441776	1.30097e-08	3.09998e-07
CHRDL1	-0.00345587	1.3085e-08	3.09998e-07
EFNA4	-0.00346651	1.41673e-08	3.3293e-07
SPINT1	-0.00276411	1.73858e-08	4.05297e-07
NTRK3	0.00258019	1.86309e-08	4.30877e-07
SCARB2	-0.0036451	1.94642e-08	4.46605e-07
IL10RB	-0.00330026	2.07568e-08	4.72542e-07
CD74	-0.00400118	2.13641e-08	4.82596e-07
KLK4	0.0065136	2.17178e-08	4.86814e-07
EGFR	0.0017979	2.27588e-08	5.06252e-07
CD300C	-0.00393009	2.32889e-08	5.12223e-07
LILRB4	-0.00514014	2.33787e-08	5.12223e-07
REN	-0.00815915	2.40022e-08	5.21502e-07
IL6	-0.00873207	2.41602e-08	5.21502e-07
GPR37	-0.00762366	2.43799e-08	5.22375e-07
PILRA	-0.00476517	2.54965e-08	5.42312e-07
EFNA1	-0.00311196	3.12564e-08	6.60009e-07
CD99L2	-0.00269508	3.52551e-08	7.39088e-07
DPP4	0.00310276	3.72599e-08	7.75539e-07
CCL3	-0.00675261	3.76208e-08	7.7686e-07
BTN2A1	-0.00285938	3.78566e-08	7.7686e-07
IGFBP6	-0.0033129	3.93266e-08	8.01383e-07
MRC1	-0.00332203	4.09195e-08	8.28051e-07
CEACAM6	-0.00444669	4.56151e-08	9.16339e-07
NPC2	-0.00367387	4.59113e-08	9.16339e-07
CRHBP	-0.00310378	4.71256e-08	9.34177e-07
PLA2G15	-0.00286284	5.05526e-08	9.89599e-07
SHISA5	-0.00297716	5.06006e-08	9.89599e-07
INHBB	-0.00585921	6.03541e-08	1.17248e-06
COL18A1	-0.00256905	6.87965e-08	1.32764e-06
CLEC10A	-0.0038606	7.32334e-08	1.40396e-06
RNASE1	-0.00291016	7.86216e-08	1.49741e-06
CDH2	-0.00384207	7.97566e-08	1.50916e-06
TNFSF13	-0.00279254	8.40254e-08	1.57046e-06
ADAMTSL2	-0.00348717	8.40739e-08	1.57046e-06
IL2RA	-0.00441607	9.44562e-08	1.75259e-06
GFRA1	-0.00304456	9.50272e-08	1.75259e-06
OSM	-0.00779344	1.03701e-07	1.90054e-06
LEFTY2	0.00497002	1.05926e-07	1.92917e-06
BST2	-0.00570415	1.12597e-07	2.03793e-06
CD79B	-0.00479809	1.17427e-07	2.11224e-06
YAP1	-0.00307019	1.22948e-07	2.19798e-06
RARRES2	-0.00531725	1.24471e-07	2.21164e-06
VSIG2	-0.00621433	1.40928e-07	2.48887e-06
LAYN	-0.00358783	1.42142e-07	2.49518e-06
CPM	-0.00381085	1.48355e-07	2.58866e-06
ICAM5	-0.00476937	1.50098e-07	2.60348e-06
GPD1	-0.00570335	1.52919e-07	2.62584e-06
CCDC80	-0.00382267	1.53189e-07	2.62584e-06
APOC1	0.00372401	1.58805e-07	2.70619e-06
LRRN1	0.00406465	1.60164e-07	2.71348e-06
PGF	-0.0025765	2.1198e-07	3.57058e-06
ACE2	-0.00516807	2.66068e-07	4.45588e-06
TNFSF11	0.00624985	2.69604e-07	4.48929e-06
S100G	-0.00456964	3.39922e-07	5.62797e-06
TNC	-0.00484145	3.4185e-07	5.62797e-06
KRT19	-0.00690214	3.47583e-07	5.69021e-06
PON3	0.00323216	3.51153e-07	5.70543e-06
SDC1	-0.00395735	3.52429e-07	5.70543e-06
DLL1	-0.00304865	3.62736e-07	5.83985e-06
DSC2	-0.00345628	3.66977e-07	5.87566e-06
SORCS2	-0.00363027	3.89496e-07	6.20214e-06
TAFA5	-0.00364229	4.45066e-07	7.04849e-06
ADAMTS8	0.0045156	5.43397e-07	8.55924e-06
NTPROBNP	-0.0099747	6.19169e-07	9.70032e-06
RSPO3	-0.00277418	6.30715e-07	9.78929e-06
NCR3LG1	-0.00324421	6.31567e-07	9.78929e-06
ADAM9	-0.00294499	6.50357e-07	1.00272e-05
FABP3	-0.00504651	6.87749e-07	1.05479e-05
POLR2F	-0.00344095	7.81505e-07	1.19231e-05
ANXA10	-0.00825783	8.23741e-07	1.2502e-05
MSR1	-0.00451204	8.32233e-07	1.25654e-05
LTBR	-0.00274656	8.59588e-07	1.29116e-05
GGH	-0.00357673	9.33757e-07	1.39337e-05
NEFL	-0.00413211	9.37203e-07	1.39337e-05
TIMP4	-0.00395959	1.20061e-06	1.77593e-05
PILRB	-0.00560782	1.21001e-06	1.78079e-05
EZR	-0.00233898	1.23262e-06	1.80495e-05
LMNB2	-0.00281768	1.2477e-06	1.81502e-05
CCL21	-0.00420576	1.25195e-06	1.81502e-05
HJV	-0.00437273	1.2646e-06	1.82428e-05
SPP1	0.0044801	1.27721e-06	1.82449e-05
TIMD4	-0.00438962	1.27727e-06	1.82449e-05
FAM3B	-0.00339142	1.33089e-06	1.89181e-05
IFI30	-0.00388201	1.44158e-06	2.03921e-05
CLEC6A	-0.00455346	1.46605e-06	2.0638e-05
NHLRC3	-0.00309611	1.4744e-06	2.06558e-05
BOC	0.00227096	1.49333e-06	2.08208e-05
DDAH1	-0.00428571	1.57538e-06	2.18602e-05
SCG2	-0.00306936	1.64339e-06	2.26959e-05
TGOLN2	-0.0025031	1.68779e-06	2.31992e-05
SPON1	-0.00305653	1.70252e-06	2.32918e-05
SELENOP	0.00210774	1.71833e-06	2.33982e-05
PALM2	-0.00382015	1.81553e-06	2.46068e-05
NBL1	-0.00253178	2.15382e-06	2.90566e-05
PTGDS	-0.00284367	2.32899e-06	3.12751e-05
GAST	-0.0125575	2.36649e-06	3.16328e-05
HSPG2	-0.00260848	2.38786e-06	3.17727e-05
SDK2	0.00351899	2.74772e-06	3.63947e-05
CCL17	-0.00853712	2.82225e-06	3.70718e-05
PRAP1	-0.00438586	2.82427e-06	3.70718e-05
HYAL1	-0.00209533	2.83801e-06	3.70851e-05
EFCAB14	-0.00258423	2.88892e-06	3.75049e-05
CD14	-0.00385081	2.89589e-06	3.75049e-05
REG1A	-0.00460507	3.23316e-06	4.16878e-05
PLTP	0.00322375	4.10326e-06	5.26735e-05
COL9A1	-0.00444094	4.24787e-06	5.42908e-05
FOLR1	-0.00260706	4.33283e-06	5.51348e-05
LCN2	-0.00365139	4.4956e-06	5.69573e-05
EPHA2	-0.00284998	4.53415e-06	5.7197e-05
LBP	-0.00538356	4.62147e-06	5.80473e-05
HLA_E	-0.00266459	4.68481e-06	5.8388e-05
COL6A3	-0.0034157	4.70702e-06	5.8388e-05
SERPINF1	-0.00270363	4.70871e-06	5.8388e-05
ATRAID	-0.00278666	4.75795e-06	5.87486e-05
ADGRG1	-0.00541683	5.22417e-06	6.4233e-05
CEACAM5	-0.00635091	5.35459e-06	6.556e-05
ITGAV	0.00146786	5.74262e-06	7.00167e-05
CALCA	-0.00497552	5.91425e-06	7.18089e-05
TNFRSF11B	-0.00254562	6.09342e-06	7.36773e-05
NOS3	-0.00493642	6.38868e-06	7.69282e-05
MDK	-0.0046518	6.58227e-06	7.8933e-05
GOLM2	-0.00207385	6.84911e-06	8.17964e-05
PRTN3	-0.00439784	7.28561e-06	8.66541e-05
FAS	-0.00292767	7.52115e-06	8.90919e-05
NCAM1	0.0025443	7.64796e-06	9.02274e-05
AGR2	-0.00914119	7.80325e-06	9.16882e-05
TOP1	0.00916394	9.1221e-06	0.000106754
CLMP	-0.00198275	9.40946e-06	0.000109677
IGFBP3	0.00241715	9.55714e-06	0.000110954
PPP1R14D	-0.00336962	9.607e-06	0.000111091
FLT3LG	-0.00285574	9.80681e-06	0.000112953
CRIM1	-0.00177731	1.01929e-05	0.000116938
NT5C1A	-0.00297392	1.09649e-05	0.000125301
B4GALT1	-0.00241709	1.12135e-05	0.000127406
IGFBPL1	-0.0029972	1.12366e-05	0.000127406
GUSB	-0.00554037	1.18449e-05	0.000133783
IL18BP	-0.00270879	1.20039e-05	0.000135055
OSCAR	-0.00295081	1.20645e-05	0.000135215
RNF149	-0.00276927	1.23411e-05	0.000137786
PALM	-0.00281662	1.25073e-05	0.000138863
CCL25	-0.00414087	1.2533e-05	0.000138863
RBP5	-0.00517724	1.27552e-05	0.00014079
CCL16	-0.00459838	1.28433e-05	0.000141228
TNFRSF19	-0.0027169	1.30055e-05	0.000142474
CST6	0.00416308	1.35965e-05	0.000148086
ALDH3A1	-0.0057223	1.36195e-05	0.000148086
PTPRR	-0.00314447	1.37482e-05	0.00014893
SERPINB8	-0.00502628	1.4173e-05	0.000152963
SMPD1	-0.00406445	1.43636e-05	0.000154448
CHGA	-0.00780469	1.52822e-05	0.000163721
CALCB	-0.00335127	1.53615e-05	0.000163969
VGF	-0.00266131	1.67112e-05	0.000177641
CALB2	-0.00286413	1.67643e-05	0.000177641
RTBDN	-0.00249076	1.84154e-05	0.000194429
LCN15	-0.00524701	1.97653e-05	0.000207928
EGLN1	-0.00475244	2.02546e-05	0.000212309
CA14	0.00301649	2.04956e-05	0.000213723
SLAMF8	-0.00456908	2.05361e-05	0.000213723
DLK1	-0.00439076	2.06215e-05	0.000213847
HSPB6	-0.00317978	2.10173e-05	0.000217178
CLUL1	0.00391902	2.11203e-05	0.000217472
TCN2	-0.00257372	2.12653e-05	0.000218194
LGALS3	-0.00252972	2.18889e-05	0.000223804
MMP1	-0.00782169	2.30274e-05	0.000234622
CCL18	-0.00600097	2.66682e-05	0.000270771
KRT8	-0.00540836	2.70999e-05	0.000274198
LILRB1	-0.00232553	2.76581e-05	0.000278878
CREG1	-0.0030436	2.82167e-05	0.000283083
L1CAM	-0.0023763	2.82694e-05	0.000283083
TNF	-0.00334475	3.02544e-05	0.000301922
CGREF1	-0.00349405	3.1102e-05	0.000309322
MPO	-0.00395733	3.23748e-05	0.000320885
MMP9	-0.00506255	3.30578e-05	0.000326542
DEFA1_DEFA1B	-0.00451575	3.31697e-05	0.000326542
CCL4	-0.00577375	3.47618e-05	0.000341063
OXT	-0.0114106	3.95578e-05	0.000386817
MERTK	-0.00208497	4.09969e-05	0.000399548
NOS1	-0.00401339	4.14612e-05	0.00040208
BSG	-0.00172281	4.15326e-05	0.00040208
HIP1R	-0.00350997	4.16786e-05	0.000402157
SIRPB1	-0.00374485	4.22168e-05	0.000406006
CCL22	-0.00438194	4.38182e-05	0.000420021
CHGB	-0.0033289	4.54791e-05	0.000434512
ITGA11	0.0027811	5.02604e-05	0.000478624
SNCG	-0.00578032	5.08888e-05	0.000481525
CD4	-0.00243346	5.08956e-05	0.000481525
LHB	-0.0066055	5.25177e-05	0.000495264
CD300LF	-0.0049891	5.57229e-05	0.000523796
CXCL13	-0.00479029	5.80707e-05	0.000544109
KLK11	-0.00242708	5.95869e-05	0.000556526
TGFB1	-0.00301374	6.16119e-05	0.000573601
SOD2	-0.00299919	6.3357e-05	0.000586654
TMSB10	-0.00607487	6.34166e-05	0.000586654
RETN	-0.00339065	6.5663e-05	0.000604001
ADAM8	-0.00229317	6.57063e-05	0.000604001
SMOC1	-0.00265578	6.74411e-05	0.000617998
GRN	-0.00189997	6.80652e-05	0.000621762
PENK	-0.00249358	6.93913e-05	0.000630556
PRRT3	-0.00310208	6.94607e-05	0.000630556
OLR1	-0.00469356	6.98739e-05	0.000632337
B2M	-0.00270648	7.20552e-05	0.000650059
IL7R	0.004265	7.34973e-05	0.000659164
ADGRG2	0.00221784	7.37026e-05	0.000659164
BPIFB2	-0.00594357	7.37431e-05	0.000659164
CD46	-0.00224573	7.52573e-05	0.000670642
OGN	-0.00329202	7.57387e-05	0.000672874
ULBP2	-0.00300562	8.18946e-05	0.000725352
CD80	-0.00262877	8.94904e-05	0.000790227
CCL11	-0.00288409	9.17634e-05	0.000807851
NPPB	-0.0100649	9.31547e-05	0.000817629
LRRC25	-0.0030781	9.57531e-05	0.000837912
LTA4H	-0.00449452	9.92496e-05	0.000865908
LRIG1	-0.00262461	0.000101526	0.000883124
SULT2A1	-0.00412649	0.000102627	0.000890042
MXRA8	0.00249037	0.000116695	0.00100836
SEL1L	-0.00249801	0.000116961	0.00100836
CLEC4D	-0.00487947	0.000120784	0.00103824
DMP1	0.00485247	0.000121186	0.00103863
PHOSPHO1	-0.00230164	0.000122749	0.00104895
VWA1	-0.00319868	0.000127253	0.0010783
CXCL9	-0.00516076	0.000127282	0.0010783
IL4R	-0.00271503	0.000127294	0.0010783
LUZP2	-0.00339942	0.000129289	0.00109202
LEP	-0.00725772	0.000129939	0.00109434
PM20D1	0.0135587	0.00013097	0.00109985
SCGB1A1	0.00439765	0.000133909	0.00112129
EDIL3	-0.00273799	0.000134782	0.00112537
KAZALD1	0.00342982	0.000138922	0.00115662
CES2	-0.00415797	0.00014033	0.00116502
RBFOX3	-0.00291359	0.000140862	0.00116612
KLF4	-0.00302724	0.000151129	0.00124435
TPP1	-0.00339139	0.000151167	0.00124435
HNMT	-0.0037023	0.000155243	0.00127251
CDH1	-0.00302376	0.00015546	0.00127251
VMO1	-0.00507564	0.000157778	0.00128786
CALB1	-0.00327	0.000158539	0.00129046
ITPR1	-0.00529694	0.000160059	0.0012992
FURIN	-0.00277185	0.000160642	0.0013003
DPY30	-0.00460132	0.000161271	0.00130178
CD99	-0.00146044	0.000163739	0.00131806
KIAA0319	-0.00232941	0.000165606	0.00132941
PON1	0.0019573	0.000166104	0.00132974
CLEC7A	-0.00444787	0.000166946	0.00133214
FABP2	-0.00582583	0.000167317	0.00133214
DKK3	-0.00225837	0.000171321	0.0013603
EDN1	-0.00220371	0.000171867	0.00136093
GPR15L	-0.00454857	0.000179299	0.00141593
VEGFA	-0.00447789	0.000179967	0.00141736
FUT3_FUT5	-0.00347643	0.000182189	0.001431
CFD	-0.00158254	0.000186471	0.00146069
MUC13	-0.00367635	0.000189189	0.00147801
EPHB4	-0.00184958	0.000192492	0.00149979
IL1R1	-0.0016426	0.000197854	0.00153746
TPK1	-0.00199775	0.000211545	0.00163947
TXNDC15	-0.00198928	0.000228676	0.00176754
SCARA5	-0.0021377	0.000234102	0.00180373
ENPP7	-0.0063931	0.000234597	0.00180373
OSMR	-0.00152178	0.000236089	0.00181043
BGLAP	0.00672161	0.0002431	0.0018593
SUMF2	-0.00386231	0.000257336	0.00196303
IL13RA1	-0.0015306	0.000261946	0.00199297
MAD1L1	-0.00360913	0.00026483	0.00200623
CCL23	-0.00301709	0.000265065	0.00200623
APOD	0.00318987	0.00026726	0.00201692
LAMP2	-0.00134071	0.000267861	0.00201692
SCG3	-0.00251506	0.000270411	0.00203058
CD48	-0.00213734	0.000271069	0.00203058
GZMH	-0.00557445	0.000278339	0.0020797
CANT1	-0.00148825	0.000281486	0.00209782
IGSF8	-0.00215332	0.000285318	0.00212096
SPINT2	-0.00298767	0.000289746	0.0021484
IL18	-0.00352377	0.000296612	0.00219372
APOE	0.00519128	0.000303074	0.00223584
ADAM12	-0.00247767	0.000306529	0.00225562
KLK10	-0.00288376	0.000308124	0.00226165
SEPTIN8	-0.00235582	0.000312513	0.00228809
CHRDL2	0.00365339	0.000316733	0.00231318
IGSF3	-0.00246616	0.000318532	0.00232051
CCER2	-0.00445776	0.000319487	0.00232166
SERPINA7	-0.00133019	0.000323551	0.00234534
CD38	-0.00223463	0.000325308	0.00235223
KLK13	-0.00323395	0.00033899	0.00244509
REG1B	-0.00399545	0.000342926	0.00246698
CDHR2	-0.00590811	0.000343717	0.00246698
BCAN	0.00252969	0.000348851	0.00249325
IL19	-0.00500815	0.00034909	0.00249325
CCL20	-0.0064938	0.000350628	0.00249812
IGSF9	-0.00622256	0.000353211	0.00251039
CCL5	-0.00722216	0.000361081	0.00256007
PDZK1	-0.00312914	0.000391303	0.00276761
RAB6A	0.00334528	0.000406876	0.00287079
ELOA	-0.0038496	0.000412136	0.00290088
GCHFR	-0.00355407	0.000415052	0.00291437
PVR	-0.00253743	0.000421373	0.00295164
CBLN4	0.00217242	0.000423581	0.00295999
TNFRSF21	-0.00190133	0.000424695	0.00296067
CCL14	-0.00280865	0.000435012	0.00302536
MET	0.00144252	0.000436119	0.00302583
THBS2	-0.00251387	0.00044303	0.00306648
DDR1	-0.00154404	0.000453593	0.00313216
HPGDS	0.00263148	0.000456238	0.00314298
CYTL1	-0.0016386	0.00046378	0.00318739
ODAM	0.00392386	0.000467155	0.00320303
CLEC14A	-0.00216601	0.000470142	0.00321595
BLNK	-0.00266036	0.000503454	0.00343388
SEMA3F	-0.0019205	0.000504358	0.00343388
LGMN	-0.00248913	0.000510512	0.00346767
EPS8L2	-0.002064	0.000517804	0.00350902
NXPH1	-0.00262721	0.000520737	0.00352071
FETUB	-0.00225704	0.000534374	0.00360455
FGL1	-0.00440894	0.000546805	0.00367989
KRT18	-0.00555509	0.000580491	0.00389758
SELL	0.00156128	0.000583224	0.00390693
CEACAM21	-0.00591506	0.000614519	0.00410713
INHBC	-0.00322591	0.000621391	0.00414356
RRM2	-0.00357562	0.00063693	0.00423748
CRELD2	-0.00358748	0.000643529	0.00427163
SERPINE1	-0.00463294	0.000647966	0.0042913
GFOD2	0.00849283	0.000653655	0.00431916
PXN	-0.00359085	0.000675257	0.00445181
CRIP2	-0.00252733	0.000683088	0.00448524
CES1	-0.00557235	0.000683406	0.00448524
IMMT	-0.00303659	0.000690402	0.00452097
GM2A	-0.00274726	0.000692447	0.00452419
PCSK9	-0.00261314	0.000718019	0.00468078
CTSH	-0.00497442	0.000734063	0.00476917
PFDN4	-0.00365853	0.000734852	0.00476917
CCL8	-0.00408596	0.000745832	0.00482968
ANGPTL7	-0.00234632	0.000749263	0.00484114
ADAMTS4	-0.00235146	0.000773319	0.00498551
HAVCR1	-0.00414866	0.000778712	0.0050092
MMP8	-0.00499452	0.000793749	0.00509468
MMP10	-0.00388241	0.00079861	0.00510415
LSP1	-0.00271945	0.000798727	0.00510415
RNASE4	-0.0018768	0.000803968	0.0051264
TNFRSF10C	-0.00334332	0.000815171	0.00518648
IGFBP7	-0.0019336	0.000820263	0.00520751
HYOU1	-0.00146413	0.00082818	0.00524634
ACAN	0.00190837	0.000836803	0.00528947
NPPC	-0.00282621	0.000872018	0.00550013
CDH15	0.00297121	0.000889989	0.00560136
AZU1	-0.00529375	0.000907675	0.00570036
SCGB3A2	-0.00606246	0.000921639	0.0057756
IL16	-0.00278216	0.000957566	0.00598787
F9	-0.00125917	0.00104578	0.00652549
PTGR1	-0.00541273	0.00106867	0.00665408
LPCAT2	-0.00265454	0.00107705	0.00669192
EPHB6	-0.00205212	0.00109913	0.00681463
CD5	-0.00222267	0.00113758	0.00703801
IDUA	-0.00295195	0.00114344	0.00705927
RTN4R	-0.00240767	0.00115628	0.00712345
ARSA	-0.00291249	0.00116574	0.00716662
S100A11	-0.00308419	0.00119706	0.00734363
MFAP5	-0.00278262	0.00120162	0.00735614
PGLYRP1	-0.00279116	0.00122336	0.00747352
CNDP1	0.00292889	0.00122603	0.00747419
APOA1	0.00175299	0.00124679	0.00758488
CCL28	-0.00374168	0.00130418	0.00791745
IFIT3	-0.00240101	0.00131249	0.00795135
ACP5	-0.00194676	0.00133504	0.00805372
TPR	-0.00312465	0.00133747	0.00805372
MMP3	-0.00305937	0.00133768	0.00805372
LYPD8	-0.00325661	0.00136372	0.0081936
KLKB1	0.00158599	0.00137772	0.00826067
ZBTB17	-0.00267276	0.00141653	0.0084657
ESAM	-0.00199148	0.00141773	0.0084657
BGN	0.00770528	0.00143306	0.00853977
WDR46	-0.00231304	0.00149042	0.00886344
UNC5D	-0.0016956	0.00151189	0.00897278
PARP1	-0.00355692	0.00154532	0.00915255
IL18RAP	0.0110652	0.00158505	0.00936884
SLAMF7	-0.00362823	0.00165319	0.00974153
CST7	-0.00593612	0.00165479	0.00974153
FAM20A	-0.00181936	0.00170214	0.01
CD1C	0.00149865	0.00172656	0.0101232
AHNAK	-0.00204445	0.00174043	0.010184
IL1RL1	-0.00278932	0.00175722	0.0102616
DTNB	-0.00262328	0.0017671	0.0102943
CTSV	0.00254646	0.00177322	0.0102943
GHRL	0.00527048	0.00177342	0.0102943
PLAT	-0.00332318	0.00178628	0.0103484
PLIN1	-0.00231665	0.00179049	0.0103521
SRP14	-0.00381558	0.00182609	0.0105371
TFPI2	-0.00227402	0.00185341	0.0106666
GFAP	-0.00295774	0.00185585	0.0106666
IGLC2	-0.0015374	0.00187995	0.0107641
SYT1	-0.00235327	0.00188021	0.0107641
KIT	0.0018671	0.00190754	0.0108991
PSIP1	-0.00394636	0.00199102	0.0113416
GPR158	-0.00230187	0.00199276	0.0113416
ERP44	-0.00159898	0.00200635	0.0113874
IL4	0.0056005	0.00200861	0.0113874
HEG1	-0.00163628	0.00205225	0.0116121
IL15RA	-0.00218216	0.00211779	0.0119598
VEGFB	-0.00182945	0.00213616	0.0120402
SNRPB2	-0.00268327	0.00219476	0.0123466
RASSF2	-0.00346317	0.00221983	0.0124636
ADAMTSL4	-0.0013884	0.0022369	0.0125198
FCAMR	-0.0047122	0.00223844	0.0125198
IFNL1	-0.00272508	0.00225538	0.0125904
GALNT3	0.00254436	0.00226187	0.0125941
APP	-0.00405837	0.00226469	0.0125941
DPP6	0.00210847	0.00228989	0.01271
SLURP1	-0.00234351	0.00232524	0.0128816
TNFSF14	-0.00352346	0.00236815	0.0130945
SUSD2	-0.00182221	0.0024078	0.0132885
ASGR2	-0.00161011	0.00242417	0.0133536
CNTN1	0.00169957	0.0024367	0.0133738
APOM	0.00165939	0.00243955	0.0133738
APBB1IP	-0.00277715	0.00244162	0.0133738
IGF2R	-0.00136412	0.00250745	0.0137086
ADA2	-0.00252767	0.002513	0.0137132
NOMO1	-0.00146399	0.00252809	0.0137698
GLO1	-0.00360694	0.00257589	0.014004
SEZ6L	-0.00170575	0.00261946	0.0142143
MATN3	-0.00184895	0.00262981	0.014244
CD7	-0.00261912	0.00266039	0.0143753
MOG	-0.00199737	0.00266392	0.0143753
CD300A	-0.00184643	0.00267717	0.0143952
NID1	-0.00237126	0.00267749	0.0143952
AGR3	-0.00358638	0.00281198	0.0150904
PRTG	0.00146051	0.0029261	0.015674
NCAM2	0.00165512	0.00296072	0.0158303
FDX1	-0.00374935	0.00298365	0.0159237
PLXDC1	0.00198058	0.00301683	0.0160714
RGMB	-0.0015175	0.00310764	0.0165249
ANGPTL4	-0.0026785	0.00312275	0.016575
CXCL10	-0.00398935	0.00317244	0.0168082
TNFRSF9	-0.00244188	0.00318023	0.0168189
SLC39A5	-0.00327812	0.00320359	0.0169117
PTPRH	0.00281305	0.00323751	0.0170599
FABP5	-0.00412297	0.00331458	0.0174345
KIR2DL3	-0.00458652	0.0033813	0.0177533
KLK12	-0.00825521	0.00340697	0.0178559
EPHA10	-0.00379043	0.00353275	0.0184725
VCAN	-0.00177111	0.00353728	0.0184725
ALCAM	-0.00111921	0.0035506	0.0185088
WIF1	0.00199861	0.00379396	0.0197289
ROBO1	-0.00140416	0.00379819	0.0197289
SFTPA2	-0.00304767	0.00383202	0.0198692
CCN2	-0.00327843	0.00385618	0.019959
ISM1	-0.00221015	0.00391735	0.0202396
SIGLEC10	-0.00195391	0.00393013	0.0202697
ECI2	-0.00358954	0.00400436	0.0206161
MFGE8	-0.00239128	0.00405409	0.0208353
ZBP1	-0.00234545	0.0041193	0.0211331
SERPIND1	-0.00160685	0.0041999	0.0215088
CRISP2	0.0035738	0.00431104	0.0220058
ISLR2	-0.00211332	0.00431205	0.0220058
NFASC	-0.00151713	0.00445084	0.0226744
STX1B	-0.00243863	0.00463732	0.0235832
MEPE	0.00148513	0.00479213	0.024328
MEP1A	-0.00385597	0.00482776	0.0244662
INSL4	-0.00284758	0.0049162	0.0248712
PBXIP1	-0.00169305	0.00495206	0.0250092
LRG1	-0.00146582	0.00498113	0.0251125
CD36	-0.00251563	0.00503079	0.025319
PODXL2	-0.00156528	0.00503998	0.0253216
SNX2	-0.00443897	0.00511305	0.0256444
PAM	-0.00155356	0.00512835	0.025677
MILR1	-0.00283585	0.00516811	0.0258317
CSPG4	0.00183886	0.00524176	0.026155
SLC13A1	0.00346052	0.00529331	0.026367
PDCD1	-0.00243256	0.00533859	0.0265345
DTX2	0.00356929	0.00534515	0.0265345
SELE	-0.00287548	0.00547433	0.0271296
A1BG	-0.000951228	0.00554223	0.0274194
BPIFB1	-0.00346363	0.0055518	0.0274202
POF1B	-0.00257995	0.00561011	0.0276613
THBS4	0.00256262	0.00566623	0.0278909
DDC	0.00273199	0.00568579	0.0279399
SMNDC1	-0.00336094	0.00574913	0.0281933
PRSS2	-0.00277649	0.0057567	0.0281933
TNFRSF13B	-0.00185112	0.00578332	0.0282582
SFRP1	-0.00247817	0.00578935	0.0282582
FCGR3B	-0.00277085	0.00584121	0.0284637
NPTXR	-0.0018956	0.00588997	0.0286534
BAP18	-0.00372136	0.00597951	0.0290405
KLK8	-0.00199293	0.00606668	0.0294148
FGFBP2	0.00271713	0.00611917	0.0296201
ACHE	0.00175541	0.00614195	0.029681
DEFB4A_DEFB4B	-0.00826059	0.00627118	0.0302553
ANG	-0.00186763	0.00639482	0.030765
QPCT	-0.00148995	0.00639853	0.030765
XG	-0.00170431	0.0064085	0.030765
SORBS1	-0.00220505	0.00652793	0.0312868
EGFL7	-0.00221961	0.00659003	0.0315326
MAPK13	-0.00231153	0.00671939	0.0320172
MRPL58	-0.00395002	0.00672949	0.0320172
ITGA5	-0.00138345	0.00673395	0.0320172
LGALS3BP	-0.00170039	0.00673527	0.0320172
ENTPD2	0.00238729	0.00676702	0.0321158
TOP2B	-0.00433631	0.00685588	0.0324846
SIGLEC7	-0.00152083	0.00687822	0.0325375
MTUS1	-0.00297704	0.00691513	0.0326592
THBD	-0.00150007	0.00694823	0.0327624
SERPINA9	-0.00379448	0.00705699	0.0332214
THOP1	-0.00167976	0.00719015	0.0337937
PDCD5	-0.00320847	0.00728861	0.0342013
GDF2	0.00195251	0.00732974	0.034339
PRL	0.0038525	0.00751389	0.0351452
BCL2L15	-0.00313142	0.00756337	0.03532
PYY	-0.00527645	0.00757828	0.035333
INSL5	-0.00502555	0.00767731	0.0357263
CTSO	-0.00161713	0.00768715	0.0357263
LAMA4	-0.00171499	0.00783228	0.0363109
ASPN	0.00146953	0.00783787	0.0363109
CD163	-0.00235576	0.00788322	0.036463
GIPC2	-0.0015778	0.00794173	0.0366754
LEO1	-0.0016688	0.00796669	0.0367325
NELL2	-0.00151247	0.00803485	0.0369882
SSNA1	-0.00275147	0.00813575	0.0373937
SNAP25	-0.00244422	0.00839155	0.0385086
CD70	-0.00217954	0.00842558	0.038604
CHCHD6	-0.00148405	0.0085015	0.0388907
RIDA	-0.00270825	0.0086199	0.0393705
FKBP4	-0.00236107	0.00868098	0.0395875
PCBD1	-0.00248625	0.00890851	0.0405615
LY96	-0.00183499	0.00893256	0.0406076
FCRLB	-0.00311733	0.00913251	0.0414519
PCDH17	0.00180362	0.00921307	0.0417525
COCH	-0.00241773	0.00922807	0.0417556
REXO2	0.00260556	0.00924671	0.0417751
SLC9A3R2	-0.00263964	0.00941148	0.0424536
MANSC1	-0.00141369	0.00943001	0.0424715
CNTN4	0.00125073	0.00950381	0.0427378
TNFRSF17	-0.00214069	0.00976766	0.0438306
PPBP	-0.00432014	0.00977691	0.0438306
TNXB	0.00128024	0.00981914	0.0439523
SCRG1	-0.00139515	0.00992574	0.0442402
TNFSF10	0.00128623	0.00993421	0.0442402
TRIM24	-0.00339031	0.00995023	0.0442402
F3	-0.00142177	0.0099632	0.0442402
LY9	-0.00148731	0.00997418	0.0442402
MMP7	-0.00244265	0.00997455	0.0442402
SLITRK2	0.00200497	0.0102016	0.0451099
CRYBB2	-0.0037585	0.0102016	0.0451099
CWC15	-0.00310556	0.0104971	0.0463465
BTD	0.00105454	0.0105351	0.0463474
GLA	-0.0018918	0.010539	0.0463474
CLU	0.00161007	0.0105451	0.0463474
CLEC3B	0.00105634	0.0108656	0.0476844
LETM1	-0.00270032	0.0109559	0.0480084
LTBP3	-0.00273334	0.0112291	0.0491313
SIAE	-0.00236607	0.0113278	0.0494892
TACSTD2	0.0015925	0.0114599	0.0499913
IL18R1	-0.00173329	0.0115973	0.0505152
NPHS1	0.00167199	0.0116347	0.0506021
JAM2	-0.00128696	0.0117967	0.0512302
PTPRF	0.00144363	0.0118657	0.0514532
FSTL1	-0.0011245	0.0119171	0.0515994
ADGRF5	-0.00147436	0.0120071	0.0518905
CA12	-0.00156454	0.0120199	0.0518905
CRISP3	0.00135985	0.0120897	0.0520833
CLEC4M	0.00243329	0.0121003	0.0520833
ANXA5	-0.00150297	0.012361	0.053127
CD5L	0.00229809	0.0124493	0.0534275
MNDA	-0.00507151	0.0125026	0.0535057
SLAMF1	-0.00298007	0.0125166	0.0535057
CR2	0.00234085	0.0125226	0.0535057
CXADR	-0.00266118	0.0127469	0.0543358
ARHGAP1	0.00229119	0.0127617	0.0543358
HLA_A	-0.00159762	0.0127728	0.0543358
DDX58	-0.00286225	0.0131028	0.0556584
HHEX	-0.00375703	0.0133225	0.0565091
DUSP29	-0.00323962	0.0134518	0.0568931
LILRB2	-0.00171844	0.0134521	0.0568931
FCAR	-0.00235704	0.0137646	0.0581305
LILRA3	-0.00674736	0.0139101	0.05866
CFHR4	0.00355992	0.0142709	0.0600947
PDE1C	-0.0027431	0.0143384	0.0602914
FUS	-0.00195273	0.0144643	0.0607332
NUCB2	-0.00183117	0.0148836	0.062404
PSAP	-0.00140087	0.0152258	0.0637436
MAPK9	-0.00207039	0.0152468	0.0637436
AKR1B10	-0.0029096	0.0153247	0.0639775
BTN3A2	-0.00183802	0.0153723	0.0640843
CLEC12A	-0.000984842	0.0157519	0.0655728
CEACAM8	-0.0024303	0.0158328	0.0658157
TYRP1	-0.00306343	0.015892	0.0659678
PLA2G2A	-0.00285524	0.0160602	0.0665711
BMP10	0.00140983	0.0163023	0.0674786
CGB3_CGB5_CGB8	-0.0018009	0.0163271	0.0674855
FCRL6	-0.00326723	0.0163831	0.067621
KLK14	-0.00223498	0.0164378	0.0677509
HEPACAM2	0.00195482	0.0165407	0.0680785
SH2D1A	-0.00265619	0.0166736	0.0683776
TFPI	-0.00145137	0.0166778	0.0683776
ANXA1	-0.00207257	0.0166838	0.0683776
GAS6	-0.00121799	0.0168162	0.0688234
DPT	-0.00126492	0.0169774	0.0693859
PEAR1	0.00105613	0.017352	0.0707412
STAT2	-0.0036602	0.0173576	0.0707412
SFTPA1	-0.00276068	0.0174572	0.071033
SCN4B	-0.00199887	0.0174779	0.071033
RSPO1	-0.00161687	0.0175693	0.0711646
PAXX	-0.00220034	0.0175697	0.0711646
DGKZ	0.00167768	0.0175836	0.0711646
APEX1	-0.00283473	0.0178284	0.0719678
ARSB	-0.00260742	0.017834	0.0719678
IL20	0.00237939	0.0178561	0.0719678
PTPRZ1	0.00157097	0.0178999	0.0720446
PRR4	-0.00332469	0.0179698	0.072226
COQ7	0.00214202	0.0180167	0.0723149
SPOCK1	0.00119514	0.0181791	0.0728666
CLEC4A	0.00162013	0.018404	0.0736667
MFAP4	0.00147974	0.0185074	0.0739789
VNN2	-0.00215859	0.0185461	0.0740321
NADK	-0.00265563	0.0185902	0.0741064
MMP13	0.00155016	0.0186978	0.0744337
MB	-0.00233014	0.0188213	0.0745169
CDNF	-0.00149807	0.0188224	0.0745169
BRK1	-0.00209072	0.0188296	0.0745169
XCL1	-0.0026082	0.0188383	0.0745169
STAB2	-0.00136999	0.0188466	0.0745169
SKAP1	-0.00353032	0.018927	0.0746938
VAMP5	0.00270938	0.0189426	0.0746938
PTP4A3	-0.00255802	0.0190084	0.0748003
SCGN	-0.00209211	0.0190392	0.0748003
ERI1	-0.00159606	0.0190466	0.0748003
PRSS22	-0.00166056	0.0190987	0.074904
DCC	0.00106607	0.0192047	0.0752185
IFNGR2	-0.0024421	0.0193298	0.0755959
NCF2	-0.00400778	0.019353	0.0755959
CCN1	-0.00354917	0.0194006	0.0756804
DPP7	-0.00274299	0.0196558	0.0765734
ELOB	-0.00179257	0.0198827	0.077354
ANGPT1	-0.00394296	0.0199337	0.0774491
HS6ST2	-0.00141609	0.0199911	0.0775687
BAG3	-0.00187181	0.0201371	0.0780312
LBR	-0.00317829	0.0202938	0.0784778
SAFB2	-0.00130645	0.0203225	0.0784778
MARCO	-0.0012353	0.0203331	0.0784778
IGDCC4	0.00119477	0.0204564	0.0788492
ITIH3	-0.00173091	0.0206186	0.0793694
SIT1	-0.00267374	0.0209138	0.0803993
PDGFB	-0.00393541	0.0214897	0.082474
GNPDA2	0.00167251	0.02151	0.082474
CXCL8	-0.00316827	0.0217126	0.0831411
TCP11	0.00267348	0.0218254	0.0834635
SCPEP1	-0.00224945	0.0220085	0.0840019
TLR2	-0.00105361	0.0220238	0.0840019
ECM1	0.00167224	0.022149	0.084369
MASP1	0.00104915	0.0222513	0.084594
SERPINA12	-0.00507741	0.0222838	0.084594
SDHB	0.00321284	0.0222965	0.084594
CSNK1D	0.00289574	0.0223718	0.084594
VWC2L	-0.0021424	0.0223773	0.084594
TRIM21	0.0037084	0.0223823	0.084594
CILP	-0.00248556	0.0225241	0.0850197
PLIN3	-0.00196241	0.0226966	0.0855019
COL15A1	-0.00127467	0.0227105	0.0855019
MCAM	0.00154945	0.0227407	0.0855051
SFTPD	-0.00303709	0.0227876	0.0855711
TNFRSF8	-0.00207643	0.0229552	0.0860895
CD55	-0.00117509	0.0230242	0.0862374
BNIP3L	-0.00205596	0.0232059	0.0868062
TIGIT	-0.00161659	0.0233978	0.0874118
TG	0.00540265	0.023475	0.087588
NID2	-0.00336984	0.0236042	0.0879574
ALDH1A1	-0.00250834	0.0236859	0.0881489
BMP4	-0.00202157	0.0239328	0.088937
IFIT1	-0.00234619	0.0239587	0.088937
S100P	-0.00245067	0.0240098	0.0890136
CXCL11	-0.00362991	0.0240727	0.0891332
KIF1C	-0.00164529	0.024329	0.0899679
PROS1	0.00109582	0.0244866	0.0904358
CDON	0.00115189	0.024558	0.0905848
SUSD4	-0.0019087	0.0247734	0.091264
RANGAP1	0.00219226	0.0248973	0.0915402
MAN1A2	0.00111353	0.0249112	0.0915402
PI3	-0.00247904	0.024982	0.0916326
FLT4	-0.00151466	0.0249993	0.0916326
GNLY	-0.00231545	0.0250431	0.0916777
NPR1	0.00176181	0.0251139	0.0918217
CEACAM20	-0.00196973	0.0253231	0.0924704
DHPS	-0.00182454	0.0255043	0.0930157
WASL	0.0027902	0.0256893	0.0935734
STXBP3	0.00193444	0.0261014	0.0949555
CD63	-0.00230445	0.0263216	0.0956373
CSF3R	-0.00138682	0.0263559	0.0956427
RNF43	-0.00261276	0.0264379	0.0958208
SBSN	-0.00150292	0.0265262	0.095928
SPRR3	0.00320766	0.0265333	0.095928
EIF4EBP1	-0.00295072	0.0267681	0.0966571
DTX3	-0.00105858	0.0269224	0.097094
MDGA1	0.00304483	0.0269862	0.0971264
CXCL12	-0.00177363	0.0270082	0.0971264
EREG	-0.0035058	0.0270314	0.0971264
SMOC2	-0.00165678	0.0272062	0.0976342
HPSE	-0.00409827	0.027389	0.0981691
TP53BP1	0.00392687	0.0275728	0.0987065
SFRP4	0.00180188	0.0276889	0.0990007
FLT1	-0.000925993	0.027733	0.0990367
PTH	-0.00353913	0.0279814	0.0998014
DEFB118	-0.00261807	0.0280934	0.0999622
KCTD5	-0.0019086	0.0280951	0.0999622
WARS	-0.0016304	0.0284435	0.101078
SLAMF6	-0.00164011	0.0286	0.101511
F11R	-0.00248004	0.0287096	0.101776
SIGLEC9	-0.00127063	0.0287737	0.101879
NTF3	0.00156737	0.0290108	0.102594
AKR7L	-0.00305559	0.0291558	0.102982
AKR1C4	0.00236792	0.0294417	0.103753
CLEC4G	-0.00144708	0.0294454	0.103753
TGFBR3	-0.00139323	0.0299698	0.105474
LECT2	-0.00283173	0.0300417	0.105599
THSD1	0.00146205	0.0303113	0.106418
C2	-0.0010339	0.0308095	0.108037
ACP1	0.00194255	0.0308891	0.108069
HNRNPUL1	-0.00211008	0.0308927	0.108069
CD207	-0.00166815	0.0311705	0.108883
LRCH4	-0.00298528	0.0312002	0.108883
ASRGL1	0.00437847	0.0313049	0.109118
CRH	-0.00371867	0.0314199	0.109388
CD93	-0.00134005	0.031671	0.11013
CPXM1	-0.0029828	0.0320881	0.111448
SLC4A1	0.00201919	0.0324838	0.112688
TFRC	-0.00161078	0.0325693	0.11285
CCL27	-0.00248299	0.0327117	0.113209
BTC	0.00316429	0.0329131	0.113771
CPPED1	-0.00288125	0.0329604	0.113799
EDAR	0.00387502	0.0330732	0.113816
TMPRSS15	-0.00391222	0.033082	0.113816
NMI	-0.00304528	0.0330824	0.113816
GPKOW	-0.00121345	0.0333153	0.114386
ZPR1	0.00411131	0.0333266	0.114386
GET3	0.00232765	0.0334772	0.114768
LTO1	0.00178296	0.0337632	0.115612
INPP5D	-0.00246601	0.0338862	0.115897
SSC5D	-0.0018155	0.0339274	0.115902
PDCD1LG2	-0.00131306	0.0340742	0.116167
GFRA2	-0.000884667	0.0340846	0.116167
STOML2	0.00383085	0.0344285	0.117153
CXCL5	-0.00494457	0.0344543	0.117153
PRSS27	-0.00171184	0.0345461	0.117328
DNM3	-0.00232861	0.0347062	0.117734
SIGLEC8	-0.00189397	0.0354786	0.120215
CDSN	-0.0018135	0.0355239	0.120228
NUDT15	-0.00215506	0.0356683	0.120577
NT5C3A	0.00367093	0.036494	0.123225
COL5A1	0.00164956	0.0367148	0.123828
GALNT2	0.0010753	0.0368497	0.124139
BMPER	-0.000944963	0.0375967	0.126509
GPC1	-0.00120128	0.0379643	0.127599
RBP7	-0.00250721	0.0381101	0.127941
TXN	-0.00187886	0.0386455	0.129589
COL9A2	-0.00190756	0.0388932	0.13027
MATN2	-0.0011994	0.0389433	0.130288
FCGR2B	0.00238527	0.0393446	0.13148
TTR	0.00103584	0.0395316	0.131833
FUT8	-0.00237787	0.0395409	0.131833
WNT9A	-0.00116703	0.0396533	0.132057
PRCP	-0.00129175	0.0397574	0.132252
GSTA1	-0.00359127	0.0404636	0.134448
SPARC	-0.00287775	0.0406285	0.134842
GALNT5	0.00110071	0.0406789	0.134856
DNPH1	-0.00218672	0.0409986	0.135761
VSIG10L	-0.00134421	0.0412123	0.136194
TCL1A	-0.00393121	0.0412228	0.136194
MANSC4	-0.00272223	0.0416243	0.137365
DBI	-0.00320672	0.0418404	0.137922
VWC2	-0.00160896	0.0424279	0.1397
NPTN	0.00335233	0.0424885	0.139742
LTB	0.00141257	0.0426226	0.140025
PDGFA	-0.00291651	0.0427005	0.140123
GKN1	-0.00111283	0.0428591	0.140485
CEACAM3	0.00193045	0.0429434	0.140603
ANXA2	-0.00292624	0.0431911	0.141256
BCL2	-0.00226624	0.0432629	0.141332
OPTC	-0.00186548	0.0438046	0.142941
PKD1	0.0010341	0.04413	0.143742
NT5E	0.00237842	0.0441487	0.143742
PAG1	-0.00228938	0.0443346	0.14402
PEBP1	-0.00241315	0.04436	0.14402
RNASE3	-0.00454593	0.0443823	0.14402
THPO	-0.00154021	0.0445393	0.144369
LHPP	-0.00241225	0.0448632	0.145257
RRM2B	0.00270101	0.0454906	0.147064
GLRX	-0.00233261	0.0455223	0.147064
FBP1	-0.00294732	0.0459191	0.148182
SART1	-0.00144706	0.0462477	0.149077
CD248	0.00158444	0.0464766	0.149649
MOCS2	-0.0026532	0.0467107	0.150237
PHLDB1	-0.00213212	0.0474541	0.152393
FGF23	-0.00210773	0.0474854	0.152393
RFC4	-0.000808633	0.0481579	0.154235
OSTN	0.00164356	0.0481653	0.154235
BAIAP2	-0.00251088	0.0482642	0.154271
CEP164	-0.00253337	0.0482916	0.154271
ICAM4	0.00207667	0.0483354	0.154271
CLEC1A	-0.00128768	0.0487118	0.155302
TALDO1	-0.00177977	0.0488943	0.155714
SERPINA11	-0.00158832	0.0491817	0.156458
NELL1	0.00167783	0.050063	0.159008
FGFBP1	0.00122445	0.0500923	0.159008
TNFSF8	-0.00139307	0.0503445	0.159634
CFI	-0.000840362	0.0507427	0.160722
KLK6	-0.00120479	0.0510174	0.161417
ARG2	-0.00169065	0.0513031	0.162093
ERN1	-0.00149249	0.0513424	0.162093
FCN1	-0.00224417	0.0515099	0.162446
MICB_MICA	-0.00579195	0.0520905	0.164099
P4HB	-0.00150579	0.052256	0.164443
GSN	0.000734985	0.0525225	0.165103
ITIH1	0.000730346	0.0529464	0.166256
GZMA	-0.0013825	0.0530356	0.166357
PROK1	-0.00223258	0.0535043	0.167597
MIA	-0.00141551	0.0535459	0.167597
GRK5	0.00195925	0.0543621	0.169969
CTRL	-0.00258846	0.054462	0.170099
SPRED2	0.001688	0.0548876	0.171245
DBH	0.00402747	0.055045	0.171552
CA3	-0.00237758	0.0553849	0.172277
NECTIN1	-0.00124891	0.055396	0.172277
FST	-0.00190596	0.0557146	0.173084
PCDHB15	0.00149183	0.055862	0.173341
HS1BP3	-0.00339397	0.0559163	0.173341
TSPAN7	0.00348902	0.0561015	0.17373
BAG6	0.00137618	0.0562764	0.174086
TK1	-0.00167704	0.0567565	0.175331
SEMA3G	-0.00164838	0.056799	0.175331
GBP1	-0.00252941	0.0570622	0.175957
DGKA	-0.00207065	0.0571865	0.176154
UNC79	-0.00213617	0.0574959	0.176847
MTHFD2	-0.0010009	0.0576019	0.176847
GRP	-0.00206128	0.0576335	0.176847
TRIAP1	-0.00239833	0.0576543	0.176847
USP28	-0.00139383	0.0583484	0.178788
RAB44	-0.00164534	0.0587627	0.179636
IFNG	-0.00428722	0.0587664	0.179636
ATRN	0.000629667	0.0588101	0.179636
SMAD5	-0.000760486	0.0592453	0.180776
DNPEP	-0.002163	0.0593985	0.181054
EPPK1	-0.00275826	0.0601889	0.183176
CTHRC1	-0.00108984	0.0602205	0.183176
PRG2	-0.00196505	0.061	0.185302
CKMT1A_CKMT1B	-0.00268291	0.0610467	0.185302
LRIG3	-0.00106315	0.0613003	0.185556
MVK	-0.00294516	0.061313	0.185556
NPL	-0.00170165	0.0613215	0.185556
PON2	-0.00131901	0.0624659	0.188823
MAGEA3	-0.00312283	0.0626338	0.188934
PEPD	0.000954603	0.0627501	0.188934
F2	0.000541149	0.0627586	0.188934
CEP290	-0.00202187	0.0627619	0.188934
NINJ1	0.00203873	0.0632228	0.190007
IL12RB1	-0.00142842	0.0632488	0.190007
ENPP6	0.0014369	0.0636667	0.190917
ST6GAL1	-0.00106257	0.0636826	0.190917
PDCD6	-0.00255813	0.0641757	0.192154
MYCBP2	-0.00247535	0.0642272	0.192154
TPT1	0.00240066	0.0644397	0.192592
ARHGAP5	-0.00288855	0.0648264	0.193549
B3GNT7	-0.00131483	0.0652219	0.194531
SERPINC1	0.000541005	0.0658509	0.196206
IL10RA	-0.00219921	0.066203	0.197054
ITGB6	0.00111295	0.0663931	0.19718
CCN5	-0.0014711	0.0664112	0.19718
GGT1	-0.00183112	0.0664486	0.19718
RAP1A	0.00253064	0.0666463	0.197566
APOA2	-0.00175324	0.0671611	0.19889
CCL13	-0.00249873	0.0685842	0.202791
ACADSB	0.00324815	0.0686703	0.202791
IFNGR1	-0.000741995	0.0686874	0.202791
KYNU	-0.00163158	0.0687742	0.202842
FUT1	0.00235243	0.0688583	0.202885
F11	0.00111135	0.069058	0.203268
GDNF	-0.00138959	0.0691461	0.203321
ICAM2	-0.00113724	0.069241	0.203395
TYMP	-0.00240252	0.0693661	0.203558
ZHX2	-0.0011878	0.0701788	0.205736
CLGN	-0.00159858	0.070473	0.20639
IL34	0.00129553	0.0711482	0.208158
VEGFD	0.00124291	0.0715249	0.209051
SCRIB	-0.003317	0.0717051	0.209367
AHSP	-0.00316382	0.0725424	0.2116
PTPRK	-0.000789611	0.0734488	0.21403
CAMKK1	-0.00157223	0.0738727	0.21505
LY75	0.0013644	0.0741444	0.215626
ING1	-0.00163227	0.0747121	0.216967
LPO	-0.00217797	0.0747547	0.216967
IGFBP1	-0.00449534	0.0752751	0.21826
IL32	-0.00147983	0.0754338	0.218503
RABEPK	0.00208026	0.0761581	0.220382
CD244	0.000952876	0.0766465	0.221575
BCL2L11	-0.00154906	0.077366	0.223054
BRD2	-0.00120302	0.0774522	0.223054
GUCA2A	-0.00116911	0.0774632	0.223054
RAB37	0.00292113	0.0774804	0.223054
PNPT1	0.00416848	0.0775407	0.223054
EDNRB	0.00162523	0.0784938	0.225359
FUOM	-0.00229335	0.0784967	0.225359
AMOT	-0.00137048	0.0795073	0.227896
GIP	-0.00198507	0.0795368	0.227896
RNASE10	-0.00171374	0.0796925	0.228118
ENOPH1	0.00191092	0.0798739	0.228135
DNLZ	0.00329484	0.0799109	0.228135
DMD	-0.00179689	0.0799332	0.228135
YY1	-0.00098798	0.0801221	0.22845
GIPR	-0.0017194	0.0804115	0.228893
TP53I3	-0.00188828	0.0804345	0.228893
CASP4	-0.00591969	0.0808845	0.229949
MLN	-0.00311812	0.0809974	0.230028
DNAJA1	-0.00163175	0.0810702	0.230028
HS3ST3B1	-0.00130426	0.0813896	0.230709
MRI1	0.00237856	0.0814969	0.230789
IL5	0.0049936	0.0815784	0.230795
GRPEL1	-0.00210313	0.0816766	0.230849
NGF	0.000417972	0.0822316	0.232193
CDH6	0.00130972	0.0824948	0.23271
SCARF1	-0.0014593	0.0826341	0.232878
GP5	0.00124971	0.0837777	0.235873
APLP1	0.00183614	0.0842013	0.236836
TOR1AIP1	-0.00181441	0.0844995	0.237446
JAM3	-0.00174019	0.0846044	0.237512
CEMIP2	-0.00121608	0.0852082	0.238977
DDT	-0.00147427	0.0860809	0.241192
ENPP2	-0.000937754	0.0865037	0.242144
LEPR	0.00106636	0.0866065	0.242199
CEP152	-0.0014459	0.0867052	0.242243
AGBL2	0.00302849	0.0869945	0.242801
CD86	0.000962535	0.0871236	0.242801
IL9	0.00196569	0.0872333	0.242801
BAG4	-0.0017004	0.0872385	0.242801
IDS	0.000290149	0.0873672	0.242928
LGALS8	-0.002039	0.0878083	0.243704
RNF168	0.00139854	0.0878139	0.243704
CHP1	0.00250954	0.0888427	0.246325
CLNS1A	0.00115439	0.0890754	0.246735
PADI2	0.00186499	0.0893409	0.247136
CLSTN2	0.00129226	0.0893897	0.247136
DAG1	-0.00159302	0.0900094	0.248614
LMOD1	-0.00118202	0.0915229	0.252555
PSME2	-0.00128141	0.0916661	0.252711
MORC3	-0.000945034	0.0918509	0.252981
FGR	-0.00199407	0.0920221	0.253213
NBN	-0.00176273	0.0923203	0.253794
PNMA2	0.00145604	0.0925608	0.254215
ITGAL	-0.00148717	0.0928396	0.254741
ARHGAP30	-0.00126369	0.0930962	0.255204
RCC1	-0.00172612	0.0940758	0.257647
TPMT	0.00248724	0.0945779	0.258779
NAAA	0.00193485	0.0954702	0.260976
GPA33	0.00460139	0.0958018	0.261637
SLIT2	0.00172488	0.0960767	0.262142
MEP1B	0.00398573	0.0964543	0.262631
IL12RB2	0.00137929	0.0964835	0.262631
CTSL	-0.000798333	0.0965262	0.262631
CASQ2	0.00166721	0.0966375	0.262688
FAM171A2	0.00529191	0.096765	0.26279
ERBB2	-0.000802208	0.0971707	0.263644
CA5A	-0.00311552	0.0973135	0.263644
ITGA2	0.00110877	0.097351	0.263644
SOD1	-0.00165431	0.0979676	0.265067
SCGB3A1	-0.000857097	0.0982266	0.265291
PRDX6	0.002007	0.0982325	0.265291
NOTCH3	0.00113334	0.0983964	0.265488
EFHD1	-0.00115779	0.0986336	0.265743
IL11	0.00210193	0.0986734	0.265743
CTSE	-0.00167835	0.0992308	0.266998
UBE2L6	-0.00202591	0.0995473	0.267602
EIF2AK2	-0.00358531	0.0997884	0.268003
F7	-0.000979211	0.100041	0.268262
SPINK8	0.00121842	0.100069	0.268262
PGLYRP4	0.00207214	0.10022	0.268421
PLB1	0.00197815	0.100559	0.268838
LCP1	-0.0015598	0.100576	0.268838
TGFBI	-0.000879429	0.100653	0.268838
TMEM106A	-0.0022516	0.101058	0.269674
CFB	-0.0011185	0.101174	0.269736
CD200R1	0.00111908	0.102196	0.272212
MYDGF	-0.00327502	0.102449	0.272636
GOLGA3	-0.00257086	0.102561	0.272685
ATOX1	-0.00230843	0.102819	0.273121
SERPINF2	0.000446492	0.103074	0.273549
GORASP2	-0.00152244	0.103379	0.274109
LYPD1	0.00207435	0.10367	0.274632
VEGFC	-0.00180902	0.103966	0.275165
GH1	0.00556158	0.104339	0.275903
PSPN	-0.00322364	0.10462	0.276393
IL22RA1	0.00138664	0.104823	0.276681
ASS1	0.00254611	0.105114	0.277196
TSHB	0.00279881	0.105472	0.27789
RPL14	-0.00132786	0.105655	0.27812
UBQLN3	-0.00145619	0.10583	0.278329
NEDD9	-0.00110257	0.106641	0.279904
POSTN	0.00118467	0.106656	0.279904
LRPAP1	-0.00186149	0.106717	0.279904
ARNT	0.00121975	0.107322	0.280965
CDH4	-0.00155167	0.10741	0.280965
GALNT10	-0.000877909	0.107411	0.280965
MYL4	-0.00168319	0.10767	0.281391
TCOF1	-0.000988579	0.10862	0.283594
NAMPT	-0.00172818	0.108789	0.283594
STX6	0.00219295	0.108805	0.283594
TFAP2A	-0.00187734	0.109047	0.28397
TREML1	-0.00168298	0.109151	0.283988
ERBB4	0.000796232	0.109521	0.284597
IL17C	-0.00229809	0.10958	0.284597
SLITRK1	-0.00107953	0.110442	0.286578
AKAP12	0.000708779	0.110582	0.286686
CASP10	-0.00226717	0.111257	0.288179
CFP	0.000729243	0.111535	0.288643
PKD2	-0.00187884	0.111862	0.288996
TOP1MT	-0.0016183	0.11187	0.288996
B3GAT3	0.000652248	0.112173	0.289523
DRAXIN	-0.0013715	0.113182	0.291668
SAP18	0.00234723	0.113204	0.291668
OMG	0.00206426	0.113817	0.292989
HMMR	-0.00154935	0.114227	0.293538
DPP10	-0.00109646	0.114232	0.293538
CSH1	-0.00088565	0.11486	0.29478
DEFB116	0.00243983	0.114918	0.29478
DDX39A	-0.000688654	0.115415	0.295795
CD40LG	-0.00240299	0.116649	0.298695
GPC5	0.00171781	0.117875	0.301571
FAM3D	-0.00254843	0.118151	0.302011
ATP6V1G2	-0.00314641	0.118278	0.302069
CSF3	-0.0015367	0.11899	0.3033
FGF5	-0.00102085	0.119023	0.3033
SH2B3	0.00305012	0.119072	0.3033
GH2	-0.0053252	0.119759	0.304784
VSTM1	-0.00151356	0.119997	0.305124
LGALS7_LGALS7B	-0.00125546	0.120144	0.30523
RABGAP1L	-0.00192301	0.120315	0.305399
EP300	-0.00094304	0.120543	0.305711
PPY	-0.00315704	0.120872	0.30628
MAP1LC3B2	0.00206413	0.121611	0.307686
ITGB1	0.000667185	0.121718	0.307686
TBL1X	0.00263311	0.121744	0.307686
LIF	-0.00157049	0.122052	0.308198
KDM3A	0.0028484	0.122229	0.308376
NPY	-0.00199764	0.122762	0.309453
MYL3	-0.00210511	0.123159	0.310185
CD3G	0.00279121	0.123535	0.310864
SERPINA1	-0.000242856	0.124476	0.312961
CLIC5	-0.000948536	0.124843	0.313615
PPCDC	-0.00146892	0.126886	0.31825
MTDH	-0.00280523	0.126907	0.31825
PCSK7	-0.00136819	0.12712	0.318509
COL3A1	-0.000696002	0.12765	0.319564
NPTX1	0.00119119	0.127846	0.31978
CD3E	-0.00107577	0.128863	0.32179
PGR	0.00311615	0.12887	0.32179
USP47	0.00260936	0.129047	0.321956
ANGPTL1	-0.000885291	0.129197	0.322053
PACS2	-0.00189647	0.130199	0.324272
TSC22D1	-0.00201652	0.130416	0.324537
KRT5	-0.0014584	0.131406	0.326721
NFKBIE	-0.0015063	0.131866	0.327586
LTA	-0.00121181	0.132317	0.328426
NTRK2	0.000753521	0.133001	0.329843
GIMAP7	0.00097309	0.133483	0.330756
HSBP1	-0.00282483	0.133797	0.330966
SCP2	0.00228013	0.133894	0.330966
ADAMTS16	-0.000933986	0.133908	0.330966
NUMB	-0.00251163	0.134085	0.331121
NEK7	-0.00222617	0.134365	0.331311
GSTA3	-0.0023978	0.134389	0.331311
GPIHBP1	-0.00208539	0.134743	0.33162
CPTP	-0.00120037	0.13482	0.33162
TDP1	-0.00205814	0.134856	0.33162
CA7	0.00103686	0.135428	0.332746
CD33	-0.0023904	0.135779	0.333306
KIR2DL2	-0.00259518	0.135885	0.333306
DSG4	0.00158185	0.136089	0.333527
PCDH1	-0.000643282	0.13642	0.334056
PTPRS	0.000717352	0.136765	0.33435
EXTL1	0.00139133	0.136769	0.33435
MZT1	0.0015655	0.137035	0.33462
PRKAR1A	0.00251142	0.13715	0.33462
BOLA2_BOLA2B	-0.00167973	0.137224	0.33462
PCDH12	0.000748894	0.137808	0.335763
AOC3	0.000895498	0.138092	0.336174
MYBPC2	-0.00244659	0.138502	0.33689
TAGLN3	-0.00183621	0.139743	0.339536
TRDMT1	-0.00252512	0.139886	0.339536
MENT	0.000644748	0.139939	0.339536
HBEGF	-0.00214776	0.140458	0.340511
ENSA	-0.00152383	0.140721	0.34055
ZNF75D	0.00182164	0.140783	0.34055
C1RL	-0.000587827	0.140825	0.34055
NUDT5	-0.00152275	0.141762	0.342239
ADGRE5	0.000877004	0.141887	0.342239
SERPING1	-0.000526936	0.141921	0.342239
GJA8	-0.00182067	0.141993	0.342239
GPRC5C	-0.00164214	0.142134	0.342296
DCN	0.000659829	0.142754	0.343506
EDF1	-0.00204303	0.143608	0.345275
HADH	0.00190584	0.144519	0.347178
NDUFA5	-0.00103912	0.144787	0.347536
CXCL1	-0.00287764	0.146172	0.350572
SUOX	-0.00181657	0.146873	0.351963
MYO6	-0.00105008	0.147016	0.352017
HDAC9	0.00183766	0.148295	0.354532
MPRIP	0.00127162	0.148335	0.354532
CA2	-0.00211741	0.148539	0.354532
TXNDC5	-0.00194779	0.148553	0.354532
BRME1	0.00122458	0.149324	0.35608
HTR1B	-0.00127223	0.149628	0.356514
BRSK2	0.00114147	0.150106	0.35736
CSF2RA	-0.00175654	0.150416	0.357807
FCER2	-0.0014425	0.150829	0.358496
VWA5A	-0.00225694	0.151135	0.35893
RAD51	-0.00155779	0.152942	0.362915
NUDT10	-0.000734748	0.153196	0.362915
SELPLG	0.000772142	0.153258	0.362915
ATP5F1D	-0.00149807	0.153311	0.362915
SERPINA6	0.000459996	0.153942	0.364113
MAX	-0.00297798	0.154428	0.364965
CDC26	-0.00199533	0.154781	0.365504
RNF41	0.00193203	0.155443	0.36677
FBLN2	-0.000898729	0.155872	0.367484
PTH1R	0.00108634	0.156659	0.369042
IL1R2	-0.000535464	0.157161	0.369807
CEACAM16	0.00218216	0.1573	0.369807
DIPK1C	-0.00118932	0.157365	0.369807
CD209	0.00110162	0.157672	0.370231
SLC27A4	-0.00186215	0.158293	0.37139
ZP3	-0.007479	0.158591	0.371789
TNFAIP2	-0.00129789	0.159128	0.372749
ZBTB16	0.0019948	0.160578	0.375843
HGFAC	0.000806641	0.160747	0.375937
SGSH	-0.00158269	0.161068	0.376386
APCS	-0.00108585	0.161938	0.378116
CRTAM	-0.00140845	0.162236	0.378221
PDE4D	0.00172426	0.162243	0.378221
GADD45B	-0.00138064	0.1631	0.379752
SLC39A14	-0.000945566	0.163161	0.379752
AFP	0.00190027	0.163393	0.379989
VNN1	-0.00203222	0.164126	0.381201
TXNRD1	-0.00129025	0.164175	0.381201
FMNL1	-0.00176926	0.164876	0.382523
FMR1	0.000966812	0.165025	0.382565
EPCAM	0.00280967	0.165199	0.382662
CD6	-0.0014866	0.165461	0.382964
WFDC1	-0.00154575	0.165847	0.383554
VSNL1	-0.0010276	0.166962	0.385774
NLGN2	-0.0013441	0.167072	0.385774
AIF1	-0.00145515	0.167228	0.38583
PRKD2	0.00130551	0.167498	0.386093
RNASEH2A	-0.00135079	0.167607	0.386093
PVALB	0.00309933	0.167987	0.386399
MAP2K1	-0.00177271	0.168006	0.386399
PAK4	-0.0016671	0.168182	0.386499
AFM	-0.000542911	0.168329	0.386533
MCEMP1	-0.00254049	0.168499	0.386619
SARG	-0.00299312	0.169153	0.387813
AMBN	0.000769157	0.169798	0.388912
TP53	-0.00117765	0.169899	0.388912
IKZF2	0.00249337	0.170173	0.389143
CPXM2	-0.000705909	0.170384	0.389143
ECSCR	0.00140816	0.1704	0.389143
SEZ6	-0.000842686	0.170731	0.389505
TIGAR	-0.00129056	0.170826	0.389505
MYOM3	0.0024422	0.171787	0.391136
TST	0.00205696	0.17181	0.391136
SCN2A	-0.0013215	0.17234	0.391931
FIS1	-0.00210325	0.172608	0.391931
SERPINE2	-0.00174217	0.172646	0.391931
VSTM2B	-0.00115931	0.172697	0.391931
APOL1	0.0017103	0.173043	0.392029
PTS	-0.00155728	0.173159	0.392029
ORM1	-0.000555613	0.173232	0.392029
FLRT2	0.000759023	0.173278	0.392029
CLEC1B	-0.00262205	0.174175	0.393752
IL17RB	0.00145635	0.176195	0.398009
ZNRD2	-0.00189299	0.176368	0.398091
PSMG3	-0.00143705	0.176905	0.398995
TGFBR1	-0.000592409	0.177224	0.399405
TGM2	0.00208653	0.17784	0.400483
NAGPA	0.000568043	0.178047	0.400641
PTK7	-0.00100401	0.178267	0.400825
JUN	-0.00136806	0.179071	0.402322
CD274	-0.000916585	0.179345	0.402629
BCAT1	-0.000823573	0.179567	0.402806
LYPD3	0.000901654	0.179701	0.402806
WASF1	0.00251622	0.179911	0.402967
CES3	-0.00187508	0.180439	0.403841
COL4A1	0.00108926	0.180648	0.403998
VSIG10	-0.000929042	0.180842	0.404122
UXS1	-0.00143847	0.181434	0.405102
LRRFIP1	-0.00129253	0.181559	0.405102
TOMM20	-0.00209677	0.181854	0.405449
ADAM22	0.000933816	0.182281	0.406051
ZCCHC8	-0.00160366	0.182403	0.406051
SELP	-0.00152236	0.182605	0.406192
STX4	-0.00160044	0.183065	0.406905
DNER	0.000681186	0.183364	0.407257
CCDC28A	0.000765941	0.186872	0.414733
ART3	-0.000881362	0.187183	0.415107
CCN3	-0.000907715	0.187631	0.415582
DHRS4L2	-0.00120172	0.187682	0.415582
HSD17B3	-0.00128782	0.187863	0.415605
MCFD2	-0.00113227	0.188055	0.415605
ADH1B	-0.00200571	0.188121	0.415605
NECAP2	-0.00178913	0.189073	0.417393
HRC	0.000941151	0.191365	0.421975
TNFSF12	0.000736135	0.191438	0.421975
PHLDB2	-0.0024523	0.193383	0.425818
PLEKHO1	-0.00181375	0.193474	0.425818
PLA2G7	0.000822998	0.193785	0.425971
TIMP2	0.000664155	0.193836	0.425971
DFFA	-0.0017655	0.194016	0.426046
CACNB1	-0.00156139	0.194763	0.427365
COMP	0.000871763	0.194951	0.427369
PDIA3	-0.000654187	0.195059	0.427369
VSIR	-0.00158613	0.195281	0.427536
F13B	0.00065331	0.19595	0.428677
IL3	-0.00152901	0.197145	0.430968
QDPR	-0.00112931	0.197345	0.431081
LONP1	-0.00224779	0.197551	0.431209
PCBP2	-0.00184175	0.198576	0.433123
CX3CL1	-0.00086643	0.198909	0.433524
GLOD4	-0.000937307	0.199073	0.433556
BHMT2	0.000649813	0.200358	0.43603
PTTG1	-0.00106299	0.200608	0.436248
GGA1	0.00172452	0.201075	0.436938
ARMCX2	0.00164768	0.201619	0.437666
PER3	-0.00303544	0.201711	0.437666
HMOX1	0.00118284	0.202138	0.438066
DOCK9	0.00308359	0.202196	0.438066
FGF9	-0.00106057	0.202446	0.438282
RAB6B	0.00122894	0.202766	0.438324
SAA4	0.00076153	0.202766	0.438324
SSH3	-0.000741857	0.20311	0.438741
PAGR1	-0.00113156	0.203505	0.438962
DEFB103A_DEFB103B	-0.00104414	0.203513	0.438962
NAPRT	-0.000839526	0.204756	0.441315
CIT	-0.00117463	0.205245	0.442042
PSMG4	-0.00150181	0.20594	0.443212
NMT1	-0.00167278	0.206376	0.443503
HK2	0.000713536	0.206526	0.443503
NDST1	0.00164394	0.206532	0.443503
FOLR3	-0.00466811	0.206796	0.443743
RANBP2	-0.000837733	0.208177	0.446116
FOLH1	0.00267315	0.208208	0.446116
ACY1	-0.00155314	0.208376	0.446148
UPB1	-0.00236637	0.20908	0.447326
TDO2	0.000955372	0.209425	0.447737
VCAM1	-0.000679238	0.20961	0.447803
PGD	-0.00137158	0.209875	0.448041
SPRING1	-0.00148019	0.211697	0.4516
F2R	-0.001418	0.211989	0.451643
CHL1	-0.000772656	0.212027	0.451643
NEO1	-0.000557279	0.212332	0.451891
TNFAIP8	-0.000927107	0.212454	0.451891
PREB	-0.000754867	0.212649	0.451976
BDNF	-0.00205756	0.213564	0.453589
CETN2	-0.00166027	0.214408	0.455051
NXPE4	0.000890676	0.214773	0.455493
IL2RB	0.000973584	0.215121	0.4559
TSPYL1	-0.00101222	0.215469	0.456285
KHK	-0.00159525	0.215616	0.456285
APOBR	-0.00103423	0.215997	0.45676
CRACR2A	0.00216898	0.216245	0.456879
MMUT	0.00120213	0.216459	0.456879
KLRB1	-0.000941772	0.216648	0.456879
PPP1R14A	-0.00191602	0.21673	0.456879
DSCAM	0.000867229	0.216837	0.456879
PARK7	-0.00133258	0.217432	0.45772
CEP350	-0.000940267	0.217551	0.45772
PKLR	-0.00169276	0.217738	0.457783
HSPA1A	-0.00178227	0.218049	0.457912
CREB3	-0.00138735	0.218164	0.457912
ADD1	0.00177833	0.218318	0.457912
ELN	-0.00087086	0.218533	0.457912
TBC1D17	-0.00116941	0.218585	0.457912
GNPDA1	0.000787193	0.219375	0.458705
SOWAHA	-0.00124458	0.21939	0.458705
NFKB1	-0.00182034	0.219436	0.458705
TMEM25	0.00108365	0.21998	0.459513
IL31RA	0.000998246	0.22058	0.460437
BAMBI	-0.00072523	0.22093	0.460838
PCYT2	-0.00186771	0.221333	0.460907
DUOX2	0.0017699	0.221404	0.460907
ILKAP	-0.00141384	0.221438	0.460907
AMPD3	0.00181923	0.223188	0.464112
PLXNB3	0.00113394	0.223296	0.464112
ARHGEF1	-0.00218991	0.224061	0.46537
S100A12	-0.00185594	0.225263	0.467183
DCDC2C	-0.00158546	0.225302	0.467183
VAT1	-0.000478615	0.225468	0.467183
DYNLT1	-0.00198483	0.225674	0.467183
RPE	-0.00170838	0.225736	0.467183
HAGH	-0.00183258	0.226999	0.469465
ABCA2	-0.000872102	0.227281	0.469713
KIAA1549	0.0017171	0.228113	0.4711
PTGES2	-0.00131703	0.228746	0.471789
OLFM4	-0.00292291	0.228771	0.471789
ALDH2	0.00124582	0.229409	0.47277
BACH1	-0.00174528	0.229775	0.47319
C7ORF50	-0.000555167	0.229997	0.473314
SH3BP1	-0.00114885	0.231412	0.475888
DKK1	-0.00141164	0.231794	0.476338
C8B	0.00071702	0.232162	0.476759
GCG	-0.00303729	0.232605	0.477332
ARHGEF5	-0.00175587	0.232817	0.477431
DYNC1H1	-0.00109812	0.233931	0.479377
IL33	0.000925335	0.234517	0.48021
WAS	0.00161836	0.234667	0.48021
GLRX5	-0.00211183	0.234932	0.480415
TPPP3	-0.000947257	0.235199	0.480624
VWF	-0.00171178	0.23544	0.480779
IL22	-0.00157319	0.236176	0.481826
PBK	-0.000721338	0.236283	0.481826
EDEM2	-0.00088317	0.236515	0.481962
TRAF2	0.00171251	0.236918	0.482132
PRUNE2	-0.000708096	0.237043	0.482132
DPEP1	0.00122035	0.237095	0.482132
SERPINB5	-0.00115314	0.238053	0.483562
NOTCH1	0.00036316	0.238256	0.483562
PROCR	-0.000857286	0.238296	0.483562
ENTPD6	-0.000644131	0.239237	0.485133
CD177	-0.00299874	0.240724	0.487808
CALCOCO1	0.00249179	0.240921	0.48787
C1QA	-0.000512141	0.241778	0.489038
FRZB	0.000608677	0.241834	0.489038
SIGLEC6	-0.000769515	0.243103	0.491263
COPB2	0.000988082	0.244074	0.492885
GLT8D2	-0.00110601	0.244311	0.493021
IL13RA2	-0.000662337	0.244703	0.493241
CLINT1	-0.00105641	0.244759	0.493241
PDXDC1	-0.00139362	0.244995	0.493309
BRD1	-0.000708856	0.245131	0.493309
TDGF1	0.00336809	0.245829	0.494373
ITGA6	0.00121384	0.246036	0.494447
CLEC4C	0.00105804	0.246349	0.494735
HSP90B1	0.00152839	0.246896	0.495324
TF	-0.000490341	0.247012	0.495324
PMS1	-0.00116121	0.247214	0.495324
CD40	-0.00114598	0.247387	0.495324
GFRAL	0.00145348	0.247492	0.495324
ATF4	-0.000796026	0.24808	0.495806
RBM17	-0.00176444	0.24828	0.495806
XRCC4	-0.000864901	0.248373	0.495806
MME	-0.00192158	0.248449	0.495806
DARS1	0.00170853	0.248584	0.495806
GNGT1	0.0012285	0.248854	0.496006
GFER	-0.00149163	0.249359	0.496672
MEGF10	0.000854365	0.24995	0.497194
CPQ	0.000815538	0.249962	0.497194
DKKL1	0.00206388	0.250236	0.497213
ADH4	-0.00202237	0.250313	0.497213
AHSA1	-0.00154406	0.250764	0.497642
PECR	-0.000667296	0.25087	0.497642
CDKN2D	0.00215353	0.251299	0.497749
MGLL	0.00198686	0.251497	0.497749
AK1	-0.00150771	0.25167	0.497749
WASF3	0.0019213	0.251683	0.497749
PPL	-0.000773294	0.251778	0.497749
NUDT16	-0.00199372	0.252244	0.498332
SPINK5	0.000722462	0.252523	0.498544
FKBP5	-0.00217372	0.25304	0.498921
IGHMBP2	-0.00128024	0.253056	0.498921
C3	-0.00109624	0.25467	0.501738
SAT2	-0.00152451	0.254829	0.501738
SMPD3	0.00131605	0.256053	0.503464
OGFR	-0.000754648	0.256271	0.503464
AXL	0.00062294	0.256325	0.503464
BIRC2	0.00143276	0.256397	0.503464
FEN1	-0.00146285	0.256606	0.503535
TNNI3	-0.00190225	0.258494	0.506898
LTBP2	-0.000720351	0.259045	0.507638
MEGF11	0.000756139	0.259424	0.508038
CCAR2	-0.00124478	0.261052	0.510884
CD2AP	-0.00149528	0.261373	0.511169
CPB2	0.000494384	0.261835	0.511729
NEXN	0.0015318	0.262855	0.513012
FABP9	0.00126075	0.26313	0.513012
TSPAN1	0.000601399	0.26315	0.513012
DSG2	0.000602826	0.263196	0.513012
SV2A	0.00136033	0.264109	0.514448
CTNNA1	-0.000811637	0.264762	0.515375
AFAP1	0.00187097	0.264953	0.515402
CDK1	-0.000819435	0.26572	0.516549
ERMAP	-0.0010071	0.267981	0.520597
KIF22	-0.00269775	0.269075	0.522127
MYH4	0.00102512	0.269127	0.522127
CTRC	0.00138772	0.270258	0.523852
CRNN	0.0014774	0.270375	0.523852
CD164	-0.00057062	0.270612	0.523963
DCTPP1	-0.000687353	0.27208	0.526454
MECR	-0.0020175	0.272447	0.526816
WASHC3	-0.00166697	0.273689	0.528637
LILRA6	-0.00159908	0.273752	0.528637
CRYBB1	-0.00140809	0.273977	0.528722
ZP4	-0.000754893	0.274307	0.528908
PKN3	-0.00164104	0.274592	0.528908
MTR	-0.0014308	0.274618	0.528908
LILRA2	-0.000798246	0.275114	0.529514
VIPR1	0.000547916	0.275911	0.530697
CASP1	-0.00149309	0.276402	0.531289
TMED1	-0.00119631	0.276895	0.531578
DNAJC9	-0.00170154	0.276917	0.531578
DUSP13	-0.000876077	0.277163	0.5317
IFNL2	-0.00137861	0.278465	0.533799
APOB	0.000479566	0.278623	0.533799
ABO	0.00313826	0.278866	0.533841
GABARAPL1	-0.00145137	0.279011	0.533841
HBQ1	0.00132719	0.279342	0.533983
TEK	-0.000457163	0.279452	0.533983
NFYA	-0.000832983	0.279654	0.534019
CD164L2	-0.000781235	0.280008	0.534344
NPHS2	0.00226417	0.282879	0.53947
CSPG5	-0.00107652	0.283672	0.54031
TBC1D23	0.00195342	0.283691	0.54031
PLXNB2	-0.000498857	0.284583	0.541655
GPI	-0.00101011	0.285326	0.542569
GRIK2	0.000892202	0.285435	0.542569
CORO1A	-0.00196107	0.286458	0.544158
CR1	0.000765523	0.28806	0.546845
SERPINA3	-0.000310629	0.288695	0.547694
BTNL10	0.000876579	0.289146	0.548025
RARRES1	-0.00072189	0.289246	0.548025
MAPRE3	0.00308922	0.289739	0.548406
TACC3	0.00246869	0.289936	0.548406
CCND2	-0.000782361	0.290012	0.548406
CEACAM1	-0.000486885	0.290378	0.548743
VIT	-0.000783466	0.291082	0.549717
CIAPIN1	-0.00135016	0.292953	0.552892
ID4	0.000920287	0.293245	0.552997
DCTN2	0.00197559	0.293388	0.552997
CA13	0.0021726	0.294818	0.555334
AP3B1	-0.00161579	0.295378	0.556028
DAPP1	0.00249313	0.295786	0.556437
CRYGD	-0.00200646	0.296478	0.557378
DNMBP	-0.00131049	0.296873	0.557761
BLMH	0.000679204	0.297241	0.558018
IL1B	-0.00117988	0.297392	0.558018
FKBP1B	0.00229857	0.29774	0.558311
SIL1	-0.000662677	0.298291	0.558889
DNAJB1	-0.0018433	0.298492	0.558889
AKR1B1	-0.00158507	0.298631	0.558889
AMOTL2	-0.000999779	0.298816	0.558889
HCLS1	-0.00116273	0.299736	0.560035
LAMB1	-0.000605915	0.299813	0.560035
GPNMB	-0.000573882	0.300245	0.560236
TTF2	-0.00100529	0.300345	0.560236
SUGT1	0.00168573	0.300497	0.560236
C19ORF12	-0.00131316	0.300846	0.560527
COMMD1	-0.00127445	0.301233	0.560615
NAP1L4	-0.000872131	0.301278	0.560615
SMAD1	0.00167803	0.302291	0.562142
GIGYF2	-0.00158159	0.302628	0.562188
CHM	-0.0012405	0.302702	0.562188
AGER	0.00087501	0.303218	0.562787
C1QTNF1	0.000867882	0.303624	0.562962
RGMA	-0.000638568	0.303698	0.562962
AKT3	0.00117219	0.304437	0.563972
BCL7B	-0.000923558	0.30465	0.564008
MAGED1	0.000994987	0.306213	0.565948
CXCL14	-0.00127993	0.306234	0.565948
CACNB3	-0.00171675	0.306437	0.565948
CCDC50	-0.00158321	0.306474	0.565948
HNF1A	-0.00143511	0.306777	0.566148
RBM25	-0.000933572	0.307115	0.566414
CBLN1	0.00199104	0.308149	0.567962
MYO9B	0.00137088	0.308486	0.568223
RALY	-0.000986494	0.309251	0.569272
OTUD6B	-0.00120101	0.309724	0.569782
ICAM3	-0.000512618	0.310478	0.57081
CRTAC1	0.000581592	0.310967	0.571347
EGF	-0.00208181	0.311844	0.572286
MANEAL	-0.00101651	0.311944	0.572286
USP25	-0.00146815	0.312067	0.572286
PSMD9	-0.00115965	0.312446	0.572558
ASPSCR1	-0.00138729	0.312608	0.572558
CPA2	0.00128786	0.313565	0.573949
RPS10	0.000837065	0.313888	0.57418
PFDN2	0.00112539	0.314837	0.575555
INPPL1	-0.0019776	0.315785	0.576926
SERPINB6	-0.001187	0.316447	0.577773
PSCA	-0.00522725	0.317532	0.579391
CA1	-0.00128333	0.318148	0.579424
CASC3	-0.000832534	0.318204	0.579424
MNAT1	-0.000860614	0.318323	0.579424
ESYT2	-0.0016302	0.318541	0.579424
FCN2	0.000805873	0.318825	0.579424
C2ORF69	-0.00117229	0.318837	0.579424
SCT	0.000930446	0.318991	0.579424
ANKRA2	-0.00113519	0.319284	0.579424
LPL	0.000908027	0.319339	0.579424
CALY	0.000750743	0.319944	0.580159
JMJD1C	0.00112759	0.320475	0.580761
TYRO3	-0.000555624	0.320907	0.581183
AIDA	-0.00166681	0.322271	0.58329
KIR3DL1	-0.00245409	0.322704	0.583712
NMNAT1	-0.0014582	0.323149	0.584153
SPARCL1	-0.00054039	0.32395	0.58524
SCN3A	0.00072497	0.324184	0.585299
NOS2	0.000776883	0.324425	0.585371
DLL4	-0.00165514	0.324835	0.585737
ANXA11	0.00132203	0.32503	0.585737
DUT	-0.00203072	0.325528	0.586273
CSDE1	0.00234015	0.325938	0.586438
DEFB104A_DEFB104B	-0.00108438	0.326023	0.586438
HTR1A	0.0015437	0.3273	0.588298
BEX3	-0.000921292	0.32763	0.588298
TAX1BP1	-0.00127056	0.327662	0.588298
SEMA4D	-0.000585993	0.328106	0.588732
HSD17B14	0.0011982	0.329008	0.589965
ERC2	-0.00147863	0.329308	0.589965
CYB5R2	-0.00108297	0.3294	0.589965
ADRA2A	0.00143426	0.329895	0.590488
PRKCQ	0.000866142	0.330484	0.591066
SHC1	0.00225119	0.330624	0.591066
ITIH5	-0.000864126	0.331641	0.592522
EPGN	-0.000909076	0.331887	0.592597
RPGR	0.000800976	0.332226	0.592839
CD101	0.000817586	0.332829	0.593328
CSF2	0.000684951	0.333026	0.593328
CETN3	-0.00146918	0.333111	0.593328
STAM	0.000726471	0.333574	0.59356
COX6B1	0.000629694	0.333648	0.59356
GC	0.000500101	0.334164	0.594115
NGRN	-0.000423633	0.334886	0.595035
SEPTIN3	-0.00140322	0.335603	0.595945
EPN1	-0.000834474	0.337044	0.59814
PRELP	0.000449196	0.338112	0.59967
AHCY	-0.00131258	0.341014	0.604449
REEP4	-0.00118005	0.342154	0.606102
DCLRE1C	0.000594497	0.342763	0.606811
PADI4	-0.00138652	0.343162	0.607148
ITGB7	0.00085366	0.343789	0.607888
NCAN	-0.000748077	0.344	0.607893
GAS2	-0.000960225	0.344694	0.60875
IGF1R	-0.000415186	0.345108	0.609112
DCTN1	0.00125721	0.346604	0.611382
CINP	0.000843455	0.347588	0.612748
PSMD1	-0.000935823	0.347913	0.612864
KCNIP4	0.000946434	0.34827	0.612864
CLIP2	0.00212562	0.348285	0.612864
EEF1D	-0.00174188	0.349477	0.614531
PCDH7	0.000637171	0.349656	0.614531
IL7	0.00119452	0.349901	0.614531
LARP1	-0.00117995	0.350275	0.614531
CD160	-0.000874456	0.350503	0.614531
FRMD4B	0.00133038	0.35055	0.614531
SPRR1B	-0.00156049	0.350709	0.614531
NPTX2	-0.000587974	0.35139	0.615066
CDKL5	-0.00102045	0.351541	0.615066
ADA	-0.000633462	0.351647	0.615066
ACOX1	0.000915186	0.351956	0.615226
MCTS1	0.000478022	0.352336	0.615226
OGA	-0.00130933	0.352372	0.615226
CDC123	-0.00121303	0.353054	0.615394
SOD3	0.0010757	0.353083	0.615394
SPAG1	-0.00105534	0.353102	0.615394
FYB1	-0.00171183	0.353428	0.615595
FHIP2A	0.000909466	0.35372	0.615735
CELSR2	-0.000539703	0.354432	0.616476
TPSD1	-0.000685963	0.354569	0.616476
NGFR	-0.000531892	0.356068	0.618418
LYZL2	-0.00064692	0.356113	0.618418
FGF20	-0.00081646	0.356323	0.618418
ADGRB3	0.000618622	0.35708	0.618933
RRP15	0.00168377	0.35712	0.618933
MIF	-0.00127544	0.357256	0.618933
HEPH	0.000460861	0.357597	0.619156
CEBPB	-0.000710811	0.357923	0.619352
MMP15	0.000904987	0.358296	0.61942
LDLRAP1	-0.00176398	0.358388	0.61942
SRPK2	-0.00154429	0.358794	0.619755
TPSG1	-0.00050444	0.359944	0.621372
SKIV2L	0.000732362	0.360218	0.621477
GIMAP8	-0.00094193	0.36154	0.622721
YJU2	0.000596614	0.361655	0.622721
AHNAK2	-0.000514802	0.361674	0.622721
DNAJA4	-0.00134245	0.361794	0.622721
AMN	0.000867094	0.362122	0.622918
ADGRE2	0.000508021	0.362521	0.623236
IL17A	-0.000809321	0.363271	0.623762
LAG3	0.00072867	0.363549	0.623762
CALCOCO2	-0.00141967	0.36358	0.623762
NAGA	0.00106939	0.363683	0.623762
COL4A4	-0.000940475	0.364591	0.624952
SATB1	-0.000548425	0.365001	0.625074
CCL24	0.00149037	0.365091	0.625074
NRTN	-0.000927633	0.365488	0.625302
GGT5	0.000412633	0.36587	0.625302
SSC4D	-0.00205147	0.366075	0.625302
PSRC1	0.00105926	0.366083	0.625302
ZNF830	0.0014224	0.367188	0.626638
MTIF3	-0.00157614	0.367295	0.626638
NSFL1C	-0.00122248	0.369637	0.630265
FLT3	0.000556747	0.370066	0.630342
UBAC1	-0.000651817	0.370193	0.630342
CASP7	-0.00149146	0.370331	0.630342
BTN1A1	0.000699484	0.370891	0.630926
CELA2A	-0.00104163	0.371197	0.631079
ADCYAP1R1	0.000634313	0.371541	0.631268
DNAJB8	0.00105065	0.371977	0.631268
CPA1	-0.00101305	0.372213	0.631268
PTEN	0.000539254	0.372299	0.631268
OTUD7B	-0.00112787	0.372392	0.631268
CLASP1	0.00127304	0.373193	0.631654
IPCEF1	-0.00159227	0.373242	0.631654
MEGF9	-0.000352305	0.373338	0.631654
LRP2	-0.000646287	0.373487	0.631654
LMNB1	-0.00106863	0.373754	0.631739
MRPL24	-0.000673688	0.374217	0.631795
LATS1	-0.00149724	0.37422	0.631795
SMAD3	0.000898164	0.374734	0.632295
ADGRE1	-0.00100089	0.375281	0.632852
DLGAP5	0.000941147	0.375706	0.633202
DUSP3	0.00155043	0.376109	0.633515
SESTD1	0.00114614	0.376952	0.633887
REPS1	-0.000686389	0.377419	0.633887
NACC1	-0.000976423	0.377444	0.633887
CUZD1	-0.000656499	0.37762	0.633887
BECN1	-0.00109129	0.37762	0.633887
GBP4	0.00086068	0.377788	0.633887
ANK2	0.00130712	0.377906	0.633887
MGMT	-0.00215323	0.37807	0.633887
FARSA	-0.00120454	0.37969	0.636238
MUCL3	0.000775719	0.380544	0.637059
DGCR6	-0.000770269	0.380617	0.637059
CYTH3	-0.00127757	0.381516	0.638196
FABP6	-0.000983794	0.381748	0.638219
CCN4	-0.000716112	0.382996	0.639712
CLTA	-0.000836894	0.383123	0.639712
FZD8	-0.000748032	0.383301	0.639712
ITGB2	0.000501609	0.385257	0.642609
CDH17	-0.00118807	0.38759	0.646131
STIP1	-0.00116002	0.388375	0.646813
STC2	0.000435741	0.388443	0.646813
PRKG1	0.00219128	0.389612	0.648176
SLC51B	0.00136404	0.389706	0.648176
CNGB3	0.000942411	0.390236	0.648687
DNAJB14	-0.00110411	0.390806	0.64899
ACYP1	-0.00115894	0.391084	0.64899
ELAVL4	-0.00148682	0.391086	0.64899
VAMP8	-0.00152112	0.391817	0.649396
PCNA	-0.00111341	0.391838	0.649396
ZFYVE19	-0.00154074	0.392216	0.649396
ATXN2L	-0.000812988	0.392376	0.649396
CDC25A	-0.000693678	0.392652	0.649396
CD109	0.000557873	0.392744	0.649396
DIABLO	0.00188414	0.392891	0.649396
SNX5	-0.000516551	0.393148	0.649451
ESR1	0.000978665	0.393797	0.649791
CRTAP	-0.000844664	0.394009	0.649791
SIRT2	-0.00153164	0.394262	0.649791
BID	-0.00115365	0.394549	0.649791
PRG3	0.000854144	0.394587	0.649791
TXLNA	-0.0015247	0.394691	0.649791
ENTR1	-0.000961466	0.396018	0.651607
GUK1	0.000658272	0.396336	0.651722
NDRG1	0.0011642	0.396861	0.651722
SERPINI1	0.00051932	0.397057	0.651722
PXDNL	0.000948113	0.397218	0.651722
XIAP	-0.000979723	0.39736	0.651722
PNLIP	0.00101869	0.397429	0.651722
GZMB	0.00106234	0.398488	0.65309
CYP24A1	0.00147503	0.39935	0.653778
SPTLC1	-0.000602898	0.399487	0.653778
ATG4A	-0.00102631	0.399581	0.653778
GPR101	-0.00103464	0.39987	0.653884
SLC12A2	0.000468388	0.400272	0.653939
GLI2	0.000559843	0.400496	0.653939
SLC1A4	0.000866447	0.400577	0.653939
EVI5	-0.0015346	0.400841	0.653981
SNAPIN	-0.000952378	0.401239	0.653981
MAEA	-0.000683607	0.401396	0.653981
COX5B	-0.00116315	0.4015	0.653981
RBKS	-0.000872102	0.401802	0.654107
MAMDC4	-0.000890221	0.402759	0.654886
TIMM10	-0.000674693	0.402799	0.654886
VTCN1	0.000529391	0.403073	0.654886
CAPS	-0.00161085	0.403179	0.654886
C7	-0.000518548	0.403855	0.655274
KLRD1	-0.000770645	0.403868	0.655274
PSMC3	-0.000510019	0.405086	0.656828
PI16	-0.000415392	0.40541	0.656828
RAC3	0.00117799	0.405502	0.656828
TRAF3	0.000620435	0.406862	0.6583
HSDL2	-0.000799566	0.407144	0.6583
BAX	-0.00146149	0.407318	0.6583
BST1	-0.000782994	0.407478	0.6583
GRIN2B	-0.000955519	0.40754	0.6583
CCNE1	0.00152827	0.407891	0.658501
DIPK2B	0.000434818	0.409509	0.660747
IVD	-0.00079996	0.410514	0.662002
NT5C	-0.00120424	0.411534	0.66328
CD72	-0.000724773	0.411946	0.663578
NTF4	0.000632154	0.412436	0.664
BCL7A	-0.0010379	0.413882	0.66596
OMP	0.000821058	0.414302	0.666023
PAFAH2	-0.000791252	0.414379	0.666023
CEND1	0.000953563	0.415087	0.666793
RASA1	-0.000533762	0.416193	0.667077
PINLYP	-0.00110286	0.416343	0.667077
SH3GLB2	-0.00110611	0.416446	0.667077
KIAA1549L	-0.000466635	0.416455	0.667077
CSF2RB	0.000712507	0.416969	0.667077
PRC1	-0.00071073	0.41705	0.667077
AMIGO1	0.000818744	0.417119	0.667077
PPM1A	0.000509119	0.417194	0.667077
CD82	-0.000671652	0.417555	0.667077
SNX15	-0.000898093	0.417751	0.667077
CDKN1A	-0.00171599	0.417782	0.667077
AGRP	0.000845713	0.418444	0.667768
JPT2	-0.00140137	0.419039	0.668352
CFC1	-0.000726778	0.41954	0.668785
PAIP2B	-0.000834155	0.419805	0.668842
VTA1	-0.00117533	0.420421	0.669457
LIFR	-0.000377852	0.421201	0.669836
CNP	-0.00129651	0.421284	0.669836
SERPINA5	0.000536112	0.421348	0.669836
EVI2B	-0.000658677	0.421857	0.669922
CEP112	-0.000715621	0.421862	0.669922
PPP3R1	-0.000663389	0.42235	0.670081
SUSD5	0.000554072	0.422502	0.670081
POLR2A	-0.000477743	0.422803	0.670081
VCPKMT	0.0013904	0.422882	0.670081
AP1G2	-0.00128896	0.423274	0.670336
MBL2	0.00168563	0.423519	0.670336
IDO1	0.00103453	0.423734	0.670336
THTPA	-0.00140141	0.424048	0.67044
ARHGAP25	0.000930656	0.424259	0.67044
IFT20	-0.000688326	0.425785	0.672486
C1QBP	0.00110282	0.426806	0.673733
TBCA	-0.00138295	0.427671	0.674626
ZNRF4	-0.000844674	0.427834	0.674626
PSMD5	0.000896775	0.428271	0.67495
ERBB3	-0.000289031	0.428912	0.675268
HDGFL2	-0.00100352	0.428937	0.675268
ITGAX	0.000844504	0.430199	0.676734
ARAF	-0.00105263	0.430332	0.676734
GRSF1	-0.0012618	0.430629	0.676836
RNF5	0.00114492	0.431209	0.676965
FGA	-0.000486966	0.431638	0.676965
ALMS1	-0.000674707	0.431806	0.676965
GCLM	-0.000753314	0.432038	0.676965
PPP2R5A	-0.00182458	0.432381	0.676965
FTCD	-0.00137009	0.432432	0.676965
PITHD1	0.00129685	0.432458	0.676965
IFNAR1	-0.00039892	0.43257	0.676965
HMGCS1	-0.000680182	0.433365	0.677845
SPACA5_SPACA5B	-0.0004404	0.433789	0.67806
TADA3	0.000607183	0.434059	0.67806
NRGN	-0.00141334	0.434246	0.67806
GAGE2A	-0.000998008	0.434491	0.67806
LCAT	0.000356765	0.434838	0.67806
ROBO2	0.000356378	0.434938	0.67806
OXCT1	-0.00105932	0.435131	0.67806
GP1BA	0.000503863	0.435491	0.678258
KIAA2013	0.000877501	0.435999	0.678686
ATP2B4	0.000975655	0.43644	0.67901
GOT1	-0.000623759	0.437252	0.679911
CNTN3	0.000549453	0.43761	0.680104
SHH	-0.000671602	0.440028	0.683497
CD34	0.00036619	0.44178	0.685586
HSPA2	-0.000505474	0.441928	0.685586
ECHS1	-0.00150407	0.442136	0.685586
UROS	0.00106216	0.442708	0.685586
KLRK1	-0.000708028	0.44292	0.685586
RILP	-0.000946562	0.442942	0.685586
FOSB	-0.00058683	0.443242	0.685586
SMC3	0.000870724	0.443255	0.685586
NRP2	0.000435945	0.443677	0.68574
GP6	-0.00134639	0.444191	0.68574
PDIA2	0.000617183	0.444274	0.68574
KITLG	0.000552245	0.444366	0.68574
HMCN2	-0.000862097	0.444531	0.68574
CD84	0.000469893	0.444774	0.685752
PNLIPRP1	-0.00115585	0.446562	0.688145
PZP	0.000906436	0.447494	0.688724
TEF	-0.000640605	0.447582	0.688724
PDGFC	-0.0004383	0.447647	0.688724
EXOSC10	-0.00092497	0.447985	0.688836
FN1	0.000401392	0.448363	0.688836
BCAT2	0.00082011	0.448429	0.688836
C2CD2L	0.000657238	0.448839	0.689103
MRPS16	-0.000442576	0.449188	0.689276
SAT1	-0.000758742	0.45032	0.690649
PFDN6	0.000988679	0.450931	0.691221
LYVE1	-0.000297733	0.45195	0.692146
ITGB5	0.000554624	0.452009	0.692146
PHYKPL	-0.00061594	0.452947	0.692619
DNM1	-0.0017025	0.453013	0.692619
KCNC4	0.000850864	0.453031	0.692619
IQGAP2	-0.000834337	0.453729	0.692992
RRAS	-0.00193158	0.453926	0.692992
DPEP2	-0.0004184	0.454014	0.692992
ADAMTS1	-0.000473131	0.454226	0.692992
CNTNAP2	0.000595984	0.454469	0.693
WWP2	0.000823493	0.454724	0.693027
ACTN2	-0.000814377	0.456778	0.695792
SHD	0.00129703	0.457182	0.696044
FAM171B	-0.000410526	0.457482	0.696137
C9	-0.000719736	0.458348	0.696379
ACADM	0.00106216	0.45847	0.696379
RAB39B	-0.00130619	0.458559	0.696379
HS6ST1	-0.000491311	0.458597	0.696379
VIM	-0.00172717	0.459325	0.696721
CDA	0.000705692	0.459326	0.696721
SOX2	0.000343428	0.459539	0.696721
AMIGO2	0.000329148	0.460772	0.698227
SMS	0.000950862	0.461555	0.699049
KIF20B	0.00114037	0.462299	0.699545
REST	-0.000518058	0.462362	0.699545
TMED4	0.000848544	0.463859	0.701232
UBE2B	-0.000424575	0.464035	0.701232
ATF2	-0.000985709	0.464371	0.701232
HMGCL	-0.000733456	0.46444	0.701232
DDX25	-0.000574965	0.464951	0.701284
TCL1B	-0.00119245	0.464956	0.701284
QSOX1	0.000623595	0.465771	0.70215
CASP3	0.00128007	0.466079	0.702252
PGA4	-0.00103163	0.466375	0.702333
TINAGL1	0.000316924	0.467437	0.703571
GSR	-0.000320891	0.46804	0.704113
CEP43	0.00100136	0.469086	0.704981
FGF6	-0.000628739	0.469272	0.704981
LAMA1	0.000801406	0.469342	0.704981
ACTA2	-0.000641551	0.470531	0.706369
ITGAM	0.000459942	0.470751	0.706369
PGLYRP2	-0.000439092	0.471349	0.706902
TRIM5	0.00122774	0.471928	0.707407
KDR	-0.000354186	0.473219	0.708669
ABL1	-0.000979408	0.473257	0.708669
SIGLEC5	0.00170822	0.474076	0.709526
KHDC3L	0.000972225	0.47462	0.709526
MDM1	-0.000437057	0.474718	0.709526
CLPP	-0.00136119	0.474803	0.709526
HRG	0.000437608	0.477733	0.713538
COMMD9	0.00055373	0.478155	0.713803
GLYR1	-0.000848155	0.478408	0.713815
AOC1	-0.000817822	0.478679	0.713853
RGS10	-0.000844308	0.479425	0.714403
FCER1A	-0.000336399	0.479653	0.714403
GABARAP	-0.000688885	0.479889	0.714403
TBR1	-0.000665993	0.480099	0.714403
IGFL4	-0.00106054	0.480512	0.714403
CACYBP	-0.0014501	0.480518	0.714403
ICOSLG	-0.000271958	0.4808	0.714458
CEACAM18	-0.000957658	0.481378	0.714632
EIF1AX	-0.000772005	0.481408	0.714632
TCTN3	-0.000407217	0.483313	0.717095
XPNPEP2	0.00119929	0.484631	0.718685
C1QTNF6	0.000444555	0.485157	0.719098
GP1BB	-0.000935571	0.48724	0.721818
CDK5RAP3	-0.000802537	0.488104	0.722442
RAB2B	0.000843808	0.488157	0.722442
PPP1CC	-0.00114177	0.488911	0.723192
CD22	-0.000574406	0.489744	0.724055
ANGPTL2	-0.000568945	0.490726	0.72514
SERPINH1	-0.00178173	0.491571	0.726021
BRD3	-0.00067119	0.493109	0.727923
CLEC2L	-0.000699846	0.493557	0.728215
GSAP	0.00117939	0.494026	0.728539
UPK3BL1	0.00076947	0.494617	0.729041
SERPINB1	-0.00122267	0.495172	0.729138
IDI2	-0.000630732	0.495183	0.729138
FGFBP3	-0.000488202	0.496315	0.730435
LRTM2	-0.000384283	0.49766	0.732046
LYSMD3	-0.00140053	0.498224	0.732367
ART5	-0.000870946	0.498554	0.732367
MYH7B	-0.000593961	0.498797	0.732367
GSTT2B	-0.00319201	0.498884	0.732367
USP8	0.00131295	0.499898	0.733486
CCDC134	-0.00065479	0.500935	0.734637
APPL2	0.00152081	0.501248	0.734727
WFDC12	-0.000879991	0.50163	0.734917
SRC	0.00161705	0.50263	0.736012
AMDHD2	-0.000335904	0.503322	0.736655
CRLF1	0.000338793	0.50364	0.736676
BLOC1S3	-0.000536075	0.504043	0.736676
PMM2	-0.000805917	0.504095	0.736676
NFU1	-0.00135913	0.5054	0.738213
BLOC1S2	-0.0009712	0.506686	0.739283
MAMDC2	0.000459218	0.506703	0.739283
BCAM	0.000311963	0.507289	0.739283
[truncated: 916 more rows]

## Sheet: S3. WHI demos
Table S1. Demographics of WHI-LLS participants, overall and stratified by tertile of age at menopause.
	Whole sample	Stratified by age at menopause
Variable		Earlier (<47)	Average (47-51)	Later (>51)	p	SMD
N	1210	387	429	394
Age, mean (SD) years	80.28 (6.39)	79.84 (6.72)	79.65 (6.58)	81.41 (5.69)	<0.001	0.189
Years of education, mean (SD)	15.20 (2.36)	14.82 (2.38)	15.34 (2.28)	15.42 (2.39)	0.001	0.171
Race, N (%)					<0.001	0.298
American Indian/Alaska Native	1 (0.1)	1 (0.3)	0 (0.0)	0 (0.0)
Black	304 (25.1)	136 (35.1)	94 (21.9)	74 (18.8)
Mixed race	18 (1.5)	4 (1.0)	7 (1.6)	7 (1.8)
Unknown	22 (1.8)	7 (1.8)	12 (2.8)	3 (0.8)
White	865 (71.5)	239 (61.8)	316 (73.7)	310 (78.7)
Ethnicity, N (%)					0.289	0.063
Hispanic/Latino	88 (7.3)	25 (6.5)	38 (8.9)	25 (6.3)
Not Hispanic/Latino	1122 (92.7)	362 (93.5)	391 (91.1)	369 (93.7)
Years since WHI study entry, mean (SD)	15.79 (1.03)	15.80 (1.05)	15.82 (1.03)	15.74 (1.02)	0.458	0.057
Age at menopause, mean (SD)	48.07 (6.61)	40.28 (4.95)	49.18 (1.39)	54.51 (2.33)	<0.001	2.968
Surgical menopause, N (%)					<0.001	0.54
No	943 (80.1)	229 (61.4)	357 (84.8)	357 (93.0)
Yes	235 (19.9)	144 (38.6)	64 (15.2)	27 (7.0)
HRT randomization, N (%)					<0.001	0.639
Estrogen only intervention	161 (13.3)	84 (21.7)	41 (9.6)	36 (9.1)
Estrogen only placebo	162 (13.4)	94 (24.3)	48 (11.2)	20 (5.1)
Estrogen + progesterone intervention	309 (25.5)	51 (13.2)	120 (28.0)	138 (35.0)
Estrogen + progesterone placebo	278 (23.0)	46 (11.9)	112 (26.1)	120 (30.5)
Observational study only	300 (24.8)	112 (28.9)	108 (25.2)	80 (20.3)
Number of live births, mean (SD)	3.18 (1.68)	3.00 (1.58)	3.16 (1.70)	3.37 (1.73)	0.012	0.147
Systolic blood pressure, mean (SD)	125.54 (14.65)	125.02 (14.56)	125.10 (14.13)	126.52 (15.25)	0.27	0.068
Diastolic blood pressure, mean (SD)	72.07 (9.06)	71.72 (9.34)	72.38 (8.87)	72.06 (9.00)	0.59	0.048
BMI, mean (SD)	28.28 (5.78)	29.00 (6.42)	27.97 (5.08)	27.92 (5.77)	0.013	0.121

## Sheet: S4. WHI menoage
Table S4. Results of linear models testing associations of age at menopause with proteins in WHI-LLS, adjusted for chronological age and hormone therapy randomization.
protein	beta	p	FDR p
NELL1	0.0112661	4.56599e-06	0.00209497
TFF3	-0.00954854	1.09436e-05	0.00209497
SPINK4	-0.0141282	1.52916e-05	0.00209497
EDA2R	-0.00995174	1.55183e-05	0.00209497
SKR3	-0.00691673	3.13151e-05	0.00338203
SCARB2	-0.00902764	4.66123e-05	0.00419511
MCP3	-0.0108212	5.92677e-05	0.00457208
CSTB	-0.010245	8.58258e-05	0.00579324
UNC5C	-0.00640153	0.000101301	0.00607804
VSIG2	-0.00988297	0.000126345	0.00682261
GDF15	-0.00894413	0.000143115	0.00702563
TNFRSF10C	-0.00831058	0.000202002	0.00872154
Gal3	-0.00536002	0.000209963	0.00872154
TNFRSF10A	-0.00608089	0.000248922	0.00944696
EFNA4	-0.00590123	0.000262416	0.00944696
TNFRSF12A	-0.00610342	0.000419728	0.0141658
CA3	-0.00906256	0.000459853	0.0146071
HSPB6	-0.00752341	0.000561468	0.0164123
FABP4	-0.0119755	0.000577468	0.0164123
PLC	-0.00471917	0.000942729	0.0249252
TR	-0.00764355	0.000969313	0.0249252
TNFR2	-0.00687456	0.0010416	0.0254231
TRAILR2	-0.00569258	0.00109809	0.0254231
TNFRSF11A	-0.00765165	0.00112991	0.0254231
EPHB4	-0.00496192	0.00129043	0.0278732
SCARA5	-0.00359633	0.00162524	0.033755
CXCL16	-0.00475192	0.00170521	0.0341041
CCL15	-0.00781276	0.00219171	0.0422687
TNFRSF14	-0.00590798	0.00227489	0.04236
Gal4	-0.00712524	0.00261269	0.0470285
TWEAK	0.00425512	0.00276846	0.0482248
TNFR1	-0.00603609	0.00303336	0.0511879
CCL14	-0.00554475	0.00390832	0.0639543
RARRES2	-0.00345663	0.00409294	0.0650055
Gal9	-0.0043006	0.00429459	0.0662594
CCL16	-0.00904904	0.00498435	0.0747653
IL6	-0.0105958	0.00529284	0.0772468
CADM3	-0.00654369	0.00600852	0.0817104
CST3	-0.00586571	0.00614826	0.0817104
UPAR	-0.0048216	0.00626269	0.0817104
GFRalpha1	-0.00489132	0.00626507	0.0817104
IGFBP7	-0.00443026	0.00635525	0.0817104
IGFBP6	-0.00532171	0.00656424	0.082163
IGFBP3	0.00507276	0.00669476	0.082163
CD300E	-0.00681482	0.00750383	0.0868236
SCGB3A2	-0.0100025	0.0075133	0.0868236
UMOD	0.00431155	0.00755687	0.0868236
CD5	-0.00506513	0.00816812	0.0905062
PSGL1	0.00502279	0.00851906	0.0905062
CTSZ	-0.00468517	0.00865432	0.0905062
VASN	-0.0033875	0.00894735	0.0905062
MB	-0.00675551	0.0090963	0.0905062
CD59	-0.00437674	0.00915702	0.0905062
JAMB	-0.00491241	0.00916748	0.0905062
TNFRSF9	-0.00671855	0.00921822	0.0905062
CDCP1	-0.00594933	0.00955805	0.091111
ALCAM	-0.00278241	0.00961727	0.091111
LAYN	-0.00598074	0.0101435	0.0930325
MFAP5	-0.00426422	0.0101647	0.0930325
SPON1	-0.00400833	0.0106525	0.0958725
CD22	-0.00701884	0.0112089	0.0992264
TF	-0.00373184	0.0119179	0.101042
THY1	-0.00304544	0.0120857	0.101042
SOD2	0.00134694	0.0121152	0.101042
LAIR2	-0.0120092	0.0121625	0.101042
CST5	-0.00618646	0.0139507	0.113361
EZR	-0.00333371	0.0141628	0.113361
CNDP1	0.00761713	0.0144414	0.113361
CD84	0.00426725	0.0144851	0.113361
SPOCK1	0.0032316	0.0153398	0.118336
CCL18	-0.00709164	0.0163117	0.124061
PON3	0.00786033	0.0166676	0.125007
TNFRSF13B	-0.00511146	0.0184238	0.136286
ADM	-0.00448389	0.0203991	0.148858
PI3	-0.00695602	0.0209398	0.150766
CD4	-0.00349358	0.0213124	0.15143
IL10RA	-0.00782146	0.0221979	0.153699
SMOC2	-0.00425431	0.0222009	0.153699
MMP12	-0.00624478	0.023763	0.162431
PDGFRalpha	-0.00288466	0.0265807	0.17942
IL10	-0.00565369	0.0273102	0.181931
CLEC10A	-0.004408	0.0276266	0.181931
IL18BP	-0.00352057	0.0286411	0.186339
TCN2	-0.00382926	0.0317426	0.20406
GDF2	0.00334854	0.0324096	0.205896
OPG	-0.0035734	0.0329373	0.206816
TM	-0.00310014	0.0335446	0.208208
EPHB6	-0.00337713	0.0342007	0.209532
HBEGF	0.00701786	0.034687	0.209532
MAPT	-0.00156209	0.0349221	0.209532
RGMB	-0.00337647	0.0356087	0.211305
IL2	0.00177323	0.0368332	0.214851
IL4RA	-0.00347938	0.037283	0.214851
OPN	-0.00501127	0.0374001	0.214851
SHPS1	-0.00380614	0.0406031	0.230796
CD93	-0.002959	0.04211	0.236869
LTBR	-0.0034037	0.0435493	0.242439
LILRB1	-0.00311402	0.0453527	0.249902
FAS	-0.00289065	0.0473718	0.255846
TSLP	0.00420422	0.0473789	0.255846
SRC	0.00638615	0.0492413	0.260948
REG3A	-0.00251755	0.0496097	0.260948
SCG2	-0.00375043	0.0499528	0.260948
PDGFsubunitB	0.00664018	0.0502567	0.260948
PGF	-0.00286417	0.051318	0.263921
Dkk4	-0.00480801	0.0526354	0.268142
MANF	0.0056935	0.0545313	0.275205
FGF21	-0.0108486	0.0584695	0.291585
BetaNGF	-0.0027242	0.0588569	0.291585
CCL5	0.00850451	0.0620068	0.299482
LAT	0.00849349	0.0622191	0.299482
IL1RT1	-0.00219754	0.0624476	0.299482
BMP6	0.00361119	0.0626694	0.299482
COL1A1	-0.00349915	0.0643665	0.304894
KLK6	-0.00311535	0.0651943	0.306108
TRAIL	-0.00222238	0.0665913	0.306108
sFRP3	0.00342734	0.0667509	0.306108
THBS4	0.00473204	0.0668903	0.306108
CNTN5	0.00351772	0.068922	0.31244
IL1ra	-0.005557	0.0695594	0.31244
NCDase	-0.00503331	0.0700097	0.31244
AFP	0.00565158	0.0713811	0.315057
FGF23	-0.00560023	0.0717629	0.315057
FLRT2	-0.00224137	0.0744047	0.32402
REG1A	-0.0047874	0.0768937	0.332181
MMP10	-0.00520649	0.0777463	0.333198
CCL24	0.00727025	0.0784773	0.333243
CSF1	-0.00168516	0.078991	0.333243
DRAXIN	-0.00375537	0.0825626	0.345611
RAGE	0.00355411	0.085296	0.354307
MERTK	-0.00275875	0.0862837	0.355476
CDH5	-0.00261727	0.0868941	0.355476
DPP4	0.00254591	0.0888866	0.358466
IL33	0.00231933	0.0889527	0.358466
CCL19	-0.00683	0.0906722	0.359959
PDGFsubunitA	0.00613456	0.0912225	0.359959
MSR1	-0.00269256	0.092333	0.359959
ANGPT1	0.00710048	0.0926347	0.359959
IL22RA1	0.00438978	0.092656	0.359959
CD8A	-0.00580573	0.0944702	0.364385
IL12	-0.0054526	0.095152	0.364412
CR2	-0.00389844	0.0972077	0.366794
CCL20	-0.00777486	0.0973666	0.366794
RETN	-0.0040563	0.0978118	0.366794
OSMR	-0.0013127	0.0985302	0.36694
HLAE	-0.00325007	0.101065	0.373804
RGMA	-0.00209931	0.102066	0.374936
Notch3	-0.00255145	0.10336	0.377125
MLN	0.00743948	0.105017	0.380598
NID1	0.00321438	0.106406	0.3811
F7	-0.00278358	0.10711	0.3811
IFNgamma	0.00727357	0.107273	0.3811
LEP	-0.00664805	0.110214	0.388087
NT3	0.00363218	0.110677	0.388087
SCF	-0.00222447	0.111647	0.388963
APOM	0.00236274	0.115977	0.401458
GZMA	-0.00325527	0.118918	0.405142
CA1	-0.00652262	0.119252	0.405142
CPM	0.00191688	0.120191	0.405142
LTBP2	0.00260167	0.120631	0.405142
TXNDC15	0.001453	0.120792	0.405142
CTRC	0.00588835	0.122375	0.405655
CHL1	-0.00221202	0.122541	0.405655
CD40L	0.00744674	0.123199	0.405655
GDNF	-0.00289261	0.126106	0.41178
ANG	-0.0029066	0.126584	0.41178
CRTAM	-0.00388813	0.129154	0.417623
CFHR5	-0.00250845	0.130671	0.41924
SORT1	0.00184168	0.131207	0.41924
PVR	-0.00207089	0.133107	0.421307
GCP5	0.00416948	0.13354	0.421307
AOC3	0.00217781	0.134262	0.421307
STK4	0.00579506	0.134974	0.421307
ALPP	-0.00746387	0.139625	0.431603
CX3CL1	-0.00285773	0.139871	0.431603
CLM6	-0.00217781	0.147782	0.453423
C2	-0.00216544	0.155404	0.472198
IL17RA	-0.00344302	0.156358	0.472198
NCS1	-0.00228636	0.156584	0.472198
IL16	-0.00386608	0.157399	0.472198
LSP1	-0.00334859	0.161095	0.480616
CCL3	-0.00497009	0.162538	0.482254
CTSC	0.00250728	0.166598	0.489598
GDNFRalpha3	-0.00199684	0.167148	0.489598
NCAN	0.00191932	0.168773	0.489598
IL7	0.0043781	0.169306	0.489598
X4EBP1	-0.00535791	0.169574	0.489598
SCGN	-0.00368849	0.17208	0.489598
SELL	0.00196116	0.172361	0.489598
GH	0.008847	0.172747	0.489598
CBLN4	0.00274376	0.17364	0.489598
HMBS	-0.0040222	0.174079	0.489598
MDGA1	-0.00397328	0.176787	0.494637
Dkk1	0.00383272	0.179151	0.498667
KIM1	-0.00490748	0.184627	0.505866
CCL23	0.00284078	0.186174	0.505866
IGLC2	-0.00334255	0.186479	0.505866
DECR1	0.00692918	0.186547	0.505866
TGFBR3	-0.00216731	0.18766	0.505866
ICAM5	0.00231514	0.188249	0.505866
GNLY	-0.00315796	0.188295	0.505866
MCP2	-0.00386644	0.190625	0.509591
RAB6A	0.00157287	0.191986	0.5107
SMPD1	-0.00238917	0.194812	0.51491
IL12B	-0.00418551	0.195475	0.51491
IL27	0.00251684	0.201074	0.524891
SOD1	-0.00357128	0.201246	0.524891
AXIN1	0.00591517	0.202537	0.524891
ICAM2	-0.00198895	0.203152	0.524891
ROBO2	0.00188854	0.207068	0.531993
CLIP2	0.00664123	0.207871	0.531993
ENRAGE	-0.00482525	0.210347	0.535791
FLT3	0.0022078	0.211475	0.536133
TIMD4	-0.00291951	0.214551	0.538286
PSMD9	-0.00385699	0.215113	0.538286
GT	-0.00393057	0.215427	0.538286
IL17D	-0.00185701	0.216532	0.538286
LDLreceptor	0.0029436	0.217518	0.538286
FGF5	0.00153675	0.218305	0.538286
PLA2G7	0.00215866	0.221571	0.54223
IL17A	-0.00385082	0.222243	0.54223
CLEC1B	0.00423023	0.223163	0.54223
CXCL14	0.00271858	0.223921	0.54223
SELE	-0.00313388	0.22571	0.544123
AXL	-0.00179086	0.2293	0.548233
CDH1	-0.00213365	0.230432	0.548233
PRTN3	-0.00341682	0.230461	0.548233
TIE1	0.00136066	0.232514	0.550692
TLT2	-0.00246342	0.239661	0.563151
LYVE1	-0.00186652	0.23986	0.563151
MYO9B	-0.0043109	0.241713	0.564203
CCL28	-0.00201394	0.242531	0.564203
PLXNB1	0.00248867	0.243723	0.564203
FLT1	-0.0011496	0.244488	0.564203
KIT	-0.00174155	0.247167	0.565214
IL20	-0.00218828	0.247885	0.565214
SPON2	-0.00147137	0.248886	0.565214
IL1RT2	-0.00166505	0.249113	0.565214
AIF1	-0.00251114	0.251464	0.568161
VWC2	-0.00255425	0.254266	0.571019
RFNG	-0.00189294	0.255584	0.571019
DEFA1	-0.00266567	0.255901	0.571019
BMP4	0.00189338	0.258871	0.57325
PRELP	-0.00105863	0.259024	0.57325
CXCL1	-0.00424217	0.261537	0.574502
TRAP	-0.00174752	0.261718	0.574502
ADAM23	-0.00225241	0.264338	0.576176
UBAC1	-0.00247052	0.264614	0.576176
GDF8	-0.00293862	0.26629	0.577497
ELOA	-0.00444043	0.268228	0.579373
TPMT	0.00237387	0.272974	0.586914
BCAN	0.00199574	0.273893	0.586914
IL24	0.00327181	0.281443	0.599332
Flt3L	0.0020722	0.281908	0.599332
PRSS8	-0.0017493	0.285903	0.603734
FUS	-0.0034337	0.286215	0.603734
PDL2	-0.0017204	0.28966	0.60821
CD46	-0.00194789	0.290589	0.60821
CDH6	0.00122654	0.29471	0.61261
EFEMP1	-0.00185869	0.29496	0.61261
MMP7	-0.00585341	0.301748	0.624306
XCL1	-0.00260958	0.3059	0.630481
GCSF	-0.00265158	0.309948	0.636395
TNXB	-0.00122508	0.31335	0.640943
SCLY	0.0021946	0.318516	0.643192
LIF	0.0019908	0.31906	0.643192
SERPINA7	-0.00134223	0.319076	0.643192
IgGFcreceptorIIb	0.00361132	0.319214	0.643192
ICAM1	-0.00137595	0.320731	0.643846
VEGFA	-0.00211943	0.32398	0.645976
FGF19	-0.00432981	0.324184	0.645976
ACTN4	-0.00141734	0.327732	0.649799
PAI	0.00344774	0.32851	0.649799
VAT1	-0.000996604	0.332166	0.652155
MMP1	0.00523085	0.333173	0.652155
NPY	-0.00244709	0.333637	0.652155
IL7R	-0.00219299	0.334532	0.652155
CCL11	-0.00173359	0.336581	0.653353
MATN3	0.00181703	0.337566	0.653353
PARP1	-0.00400134	0.340017	0.655109
CRTAC1	0.00281771	0.340899	0.655109
MEGF9	0.00111646	0.343343	0.655642
CXCL10	0.00359268	0.344397	0.655642
GRN	-0.00127649	0.345557	0.655642
IL18R1	-0.00167063	0.346033	0.655642
IFNGR2	-0.00252031	0.350528	0.661836
ICAM4	-0.00219774	0.360881	0.678548
LOX1	0.00268913	0.361892	0.678548
IL17F	-0.0027327	0.368257	0.688094
PRSS2	-0.00252137	0.370605	0.690093
hOSCAR	-0.00090813	0.37235	0.690959
IL2RB	0.00186019	0.378821	0.699416
CD200R1	-0.00132228	0.379498	0.699416
TNFB	-0.00172008	0.387029	0.710869
N2DL2	-0.00191022	0.3885	0.711153
GAS6	0.00153557	0.392124	0.71134
AMBP	-0.000766765	0.392583	0.71134
HAGH	-0.00409768	0.393855	0.71134
LCN2	-0.00195021	0.393872	0.71134
CPA2	-0.00222999	0.395829	0.712492
MANSC1	-0.00100268	0.400662	0.718796
LAP3	0.00190907	0.408784	0.7307
ITGB1BP2	0.00411433	0.410004	0.7307
LILRB5	-0.00258255	0.412705	0.733094
COL18A1	-0.00145272	0.415988	0.734016
CCL4	-0.00261598	0.416026	0.734016
WFIKKN1	-0.00162819	0.417302	0.734016
SIGLEC1	-0.00168993	0.419724	0.73588
PTP4A1	0.00179007	0.42815	0.745526
CXCL11	0.00348506	0.43002	0.745526
TNC	0.00201898	0.431378	0.745526
MET	0.000839982	0.43155	0.745526
FOXO3	-0.00309227	0.432131	0.745526
GMCSFRalpha	-0.00238273	0.434309	0.745526
PTX3	0.00174361	0.43489	0.745526
LAPTGFbeta1	0.00166094	0.441982	0.755286
CALCOCO1	0.00377184	0.446741	0.756083
CD6	-0.00201841	0.446944	0.756083
NCAM1	0.00095482	0.448006	0.756083
NEP	0.00252156	0.448173	0.756083
PGLYRP1	-0.00194697	0.449797	0.756083
GOPC	0.00378241	0.45085	0.756083
CGB3	0.00222534	0.45461	0.760028
PRSS27	-0.00153769	0.457957	0.762077
SCARF2	-0.00101539	0.458657	0.762077
TGM2	-0.00213618	0.461666	0.762675
HBQ1	-0.00283111	0.462114	0.762675
Siglec9	-0.00112441	0.46376	0.762675
MEPE	-0.00148332	0.464667	0.762675
IL10RB	-0.00106168	0.467403	0.763402
NRP1	-0.000708911	0.467937	0.763402
LXN	-0.00106335	0.469929	0.76383
PIgR	0.000516483	0.471828	0.76383
VMO1	-0.0023022	0.473194	0.76383
IL2RA	-0.00153027	0.473857	0.76383
ERP44	0.00134037	0.477023	0.764862
FABP2	-0.00222194	0.477635	0.764862
COMP	0.00136287	0.47958	0.764862
PRTG	0.000939999	0.480163	0.764862
CEACAM8	0.00214293	0.481602	0.764897
SPARCL1	-0.000906959	0.485079	0.76816
IL5	0.00273628	0.4884	0.770185
IL13	0.00218896	0.48921	0.770185
ADA	-0.00149024	0.492711	0.773441
CHIT1	-0.00427133	0.494726	0.774354
MMP2	0.00107921	0.51281	0.792284
IL4	-0.00224449	0.515071	0.792284
ST6GAL1	-0.00103764	0.515742	0.792284
IL15RA	-0.00102767	0.515807	0.792284
CXCL6	0.00266281	0.515998	0.792284
CNPY2	0.00192584	0.520302	0.792284
TIMP4	-0.00140784	0.521289	0.792284
BRK1	-0.001122	0.523001	0.792284
VPS53	0.00243531	0.523336	0.792284
CASP3	0.00283305	0.524064	0.792284
TPT1	0.00164153	0.524238	0.792284
S100A16	-0.00194135	0.524987	0.792284
CXCL9	0.0022437	0.525255	0.792284
CA5A	-0.00229755	0.530282	0.797638
TNFAIP8	-0.00129025	0.532521	0.798781
PLTP	0.000785977	0.534108	0.798942
IL5Ralpha	0.00200147	0.53729	0.799445
CA4	-0.000873784	0.537405	0.799445
IL1B	-0.00285188	0.54059	0.801974
CCL17	0.00257128	0.545814	0.807506
HO1	0.000931201	0.548488	0.808441
GLO1	0.00213333	0.54944	0.808441
VCAM1	-0.00088506	0.552301	0.810441
NAAA	-0.00155669	0.555103	0.810948
NOTCH1	-0.000497534	0.55565	0.810948
MMP3	-0.00163029	0.564001	0.820918
REN	-0.00225646	0.566339	0.821975
GPA33	0.00339962	0.568898	0.821975
GP1BA	0.0014196	0.569294	0.821975
AZU1	-0.00232435	0.576223	0.828053
PLXNB3	0.00134199	0.577043	0.828053
GALNT7	0.000629941	0.57862	0.828053
CASP2	0.00218084	0.580326	0.828053
NRP2	0.000476099	0.581171	0.828053
PTPRM	-0.000761662	0.583964	0.829844
SAA4	0.00134125	0.590348	0.834349
LPL	-0.000995818	0.590764	0.834349
NEMO	0.00226467	0.594271	0.834349
EGFR	-0.000458523	0.594847	0.834349
VWA1	0.00105371	0.59486	0.834349
CHI3L1	-0.00225482	0.600301	0.8398
FCN2	0.00133267	0.608703	0.842487
HGF	0.000898108	0.609974	0.842487
PSPD	0.00164531	0.61343	0.842487
THPO	0.000837135	0.613533	0.842487
USO1	0.0022466	0.617114	0.842487
IDUA	-0.00101463	0.617333	0.842487
KYNU	0.00117635	0.61833	0.842487
FS	0.000877823	0.618663	0.842487
DNER	0.000515662	0.619496	0.842487
LACTB2	-0.00173761	0.619691	0.842487
THBS2	0.000519772	0.621385	0.842487
ADAMTS13	-0.000377341	0.621779	0.842487
IL8	-0.00189608	0.622504	0.842487
NRTN	0.000856508	0.62647	0.845735
CPVL	-0.00101773	0.630827	0.848213
MCP1	-0.000994028	0.631464	0.848213
ARTN	-0.001047	0.633018	0.848213
AIMP1	0.00192599	0.636963	0.851386
HSP27	0.000838487	0.641535	0.853047
PAR1	-0.000697253	0.642557	0.853047
PCDH1	-0.000424092	0.642945	0.853047
PROC	0.000665613	0.645841	0.853794
MPO	-0.000908893	0.647552	0.853794
SERPINA5	-0.000661322	0.649413	0.853794
BLMhydrolase	0.000794979	0.651362	0.853794
ANGPTL3	-0.000885999	0.651413	0.853794
NTRK3	0.000487152	0.656875	0.855981
IL6RA	0.000814817	0.657298	0.855981
CCT5	-0.000970154	0.659032	0.855981
TRANCE	-0.00112362	0.661597	0.855981
BNP	0.00259576	0.663053	0.855981
GP6	0.00118582	0.663996	0.855981
CD163	0.000867779	0.664178	0.855981
tPA	0.001253	0.667914	0.858747
HEXA	0.000358228	0.669902	0.859256
FcRL2	-0.00129713	0.67171	0.859534
SLAMF1	0.000665919	0.674038	0.860474
PDL1	-0.000801943	0.678085	0.863599
CD38	-0.000703314	0.681372	0.863736
CPA1	0.00139391	0.682655	0.863736
TNR	0.000970197	0.686093	0.863736
PRCP	0.000583628	0.687117	0.863736
NTproBNP	-0.00207578	0.687413	0.863736
MBL2	0.00226814	0.689645	0.863736
F11	0.000514593	0.690714	0.863736
TNFSF14	0.00126981	0.691206	0.863736
SEPT9	0.000388905	0.692588	0.863736
CD200	0.000530058	0.696083	0.864109
RP2	0.00097214	0.698301	0.864109
C1QTNF1	0.000831959	0.698488	0.864109
ADAM22	-0.00073718	0.699289	0.864109
PCSK9	-0.000606152	0.700962	0.864199
CXCL5	0.00185063	0.704477	0.866555
vWF	0.00139938	0.70656	0.867142
CD40	-0.000733777	0.709468	0.867516
IL1alpha	0.000609355	0.710078	0.867516
MCP4	0.00126845	0.711788	0.867642
FCGR2A	-0.000986507	0.718662	0.872215
IL20RA	0.00071129	0.718769	0.872215
CPB1	0.00111925	0.723191	0.875346
FETUB	-0.00065695	0.726764	0.875346
ST2	-0.00079605	0.727615	0.875346
SIRT2	0.0018512	0.728303	0.875346
NBL1	-0.000288448	0.731371	0.875346
ENG	-0.000333671	0.735571	0.875346
CCL25	-0.00072968	0.737741	0.875346
TFPI	-0.000492145	0.73816	0.875346
CD244	0.000582086	0.739626	0.875346
APN	0.000410877	0.739877	0.875346
STAMBP	0.00140452	0.741617	0.875346
JCHAIN	0.00073727	0.741674	0.875346
PCOLCE	-0.000754765	0.742423	0.875346
NAMPT	-0.00157832	0.748281	0.880331
TNFRSF21	-0.000292915	0.75361	0.884673
ICAM3	0.000432893	0.771213	0.90181
SELP	0.00092835	0.771549	0.90181
SERPINA12	0.00148023	0.777105	0.903985
TNF	-0.000663665	0.778152	0.903985
ARHGAP25	0.00082341	0.778432	0.903985
CDHR2	0.0011872	0.782619	0.906898
TNFSF13B	0.000459976	0.78756	0.910669
PTPRS	-0.000307604	0.791308	0.913048
DCN	-0.000378777	0.793362	0.913383
FCGR3B	0.000648632	0.794981	0.913383
VPS37A	0.000773289	0.799815	0.916985
RSPO1	0.00039903	0.804946	0.920912
NTRK2	-0.000198122	0.807813	0.922239
CDC27	-0.000841285	0.817076	0.930319
CLM1	-0.000972681	0.820027	0.930319
MARCO	0.000494078	0.820059	0.930319
KLK4	-0.000869158	0.823117	0.93183
TBL1X	-0.000714443	0.835811	0.943048
LIFR	0.000228941	0.836845	0.943048
TIE2	-0.000201335	0.838265	0.943048
DRG2	0.00048517	0.842234	0.944561
NMNAT1	-0.00113788	0.845337	0.944561
PAM	0.000256537	0.847247	0.944561
ACAA1	0.00070473	0.847454	0.944561
DLK1	-0.00050978	0.849074	0.944561
ST1A1	-0.000687748	0.852848	0.944561
VEGFD	-0.000284854	0.853216	0.944561
LILRB2	-0.000305988	0.853603	0.944561
GAMT	0.000477993	0.862047	0.949963
DCTPP1	0.00026992	0.863444	0.949963
YTHDF3	-0.000722721	0.86469	0.949963
OSM	-0.000694441	0.865521	0.949963
BOC	-0.000185313	0.868754	0.950997
PECAM1	-0.000432906	0.869986	0.950997
IGFBP2	-0.0004358	0.874358	0.95126
CASP8	0.000508484	0.874704	0.95126
CES1	-0.000488802	0.877391	0.95126
GIF	-0.000730559	0.878723	0.95126
QPCT	0.000248293	0.879034	0.95126
IL18	-0.000452551	0.883623	0.954313
INPP1	-0.000320306	0.887768	0.956876
CDH3	0.000253866	0.890758	0.958094
CNTN1	0.000203999	0.894157	0.958094
SLAMF7	-0.000384565	0.894221	0.958094
ITGAM	-0.000279163	0.89923	0.961553
PSPN	-0.00046073	0.908761	0.969824
SFTPA1	0.000321999	0.914683	0.974219
CTSD	0.000215645	0.918418	0.976271
DDR1	-8.73858e-05	0.923319	0.979552
ATP6V1D	-0.000242243	0.92868	0.980003
NrCAM	6.98127e-05	0.93024	0.980003
L1CAM	-8.56795e-05	0.931592	0.980003
IL17C	-0.000229948	0.932067	0.980003
CTSS	-7.51594e-05	0.932818	0.980003
ACE2	0.000176368	0.936768	0.980886
Alpha2MRAP	0.000240147	0.937292	0.980886
C1QA	0.000112452	0.939827	0.981638
PLXNB2	-8.63567e-05	0.942562	0.982594
MMP9	0.000256045	0.946055	0.982599
uPA	0.000110869	0.946207	0.982599
gal8	0.000181536	0.948468	0.983057
HAOX1	0.000320864	0.954639	0.983966
AGRP	-0.000100666	0.955459	0.983966
COL9A1	-0.000142021	0.957765	0.983966
TGFBI	-7.72558e-05	0.960872	0.983966
IL1RL2	8.44772e-05	0.961949	0.983966
TMPRSS5	-8.05419e-05	0.962593	0.983966
FAP	5.93051e-05	0.962772	0.983966
AKR1B1	0.000138835	0.966664	0.983966
CTSL1	-6.63868e-05	0.968825	0.983966
NT5C3A	-0.000170703	0.969604	0.983966
JAMA	-0.000135783	0.970401	0.983966
IGFBP1	0.000137185	0.973466	0.983966
GGA1	-6.89842e-05	0.975143	0.983966
TGFalpha	-7.10344e-05	0.976246	0.983966
PAPPA	-8.53446e-05	0.976677	0.983966
GFER	5.51681e-05	0.986277	0.991787
TIMP1	-1.76952e-05	0.991012	0.994696
EpCAM	3.8944e-05	0.993208	0.994922
ITGB2	1.18482e-05	0.994922	0.994922

## Sheet: S5. WHI menoage race adj
Table S5. Results of linear models testing associations of age at menopause with proteins in WHI-LLS, adjusted for chronological age, hormone therapy randomization, race and ethnicity.
protein	beta	p	FDR p
TFF3	-0.00995512	5.7444e-06	0.00310198
NELL1	0.0103442	2.83044e-05	0.00622098
UNC5C	-0.00686282	3.62461e-05	0.00622098
CSTB	-0.0106183	5.14585e-05	0.00622098
SKR3	-0.00675084	5.76017e-05	0.00622098
SCARB2	-0.0087239	9.85817e-05	0.00887236
TRAILR2	-0.00662314	0.000153734	0.011625
EDA2R	-0.00858055	0.000187825	0.011625
EFNA4	-0.00609035	0.000193751	0.011625
VSIG2	-0.00942957	0.000287001	0.0146332
TNFRSF12A	-0.00632725	0.000298084	0.0146332
GDF15	-0.00849977	0.000346039	0.0155718
HSPB6	-0.00775265	0.000426961	0.0175946
PLC	-0.00504357	0.000463437	0.0175946
TNFRSF9	-0.00891423	0.000502398	0.0175946
EPHB4	-0.00537817	0.000532717	0.0175946
TNFR2	-0.00730645	0.000553905	0.0175946
TNFR1	-0.00699231	0.00064132	0.0192396
SPINK4	-0.0109192	0.000688732	0.0195745
LAYN	-0.0076588	0.000965565	0.024322
Gal3	-0.00478954	0.000989559	0.024322
TNFRSF14	-0.00642821	0.000990894	0.024322
TNFRSF11A	-0.00763716	0.00129079	0.0303055
FABP4	-0.0110579	0.00160877	0.0361973
IL18BP	-0.00496652	0.00183701	0.0388122
GFRalpha1	-0.005592	0.00192674	0.0388122
CA3	-0.00807716	0.00194061	0.0388122
CTSZ	-0.00554572	0.00201965	0.0389504
RARRES2	-0.00373503	0.00211851	0.0394481
CADM3	-0.0073403	0.0022503	0.0405054
TNFRSF10C	-0.00674657	0.00240795	0.041945
ADM	-0.00575107	0.00273988	0.046093
TNFRSF10A	-0.004956	0.0028168	0.046093
MCP3	-0.00783086	0.00295696	0.0469635
Gal9	-0.00444045	0.00338359	0.0522039
UPAR	-0.00519457	0.00351719	0.0527579
SPOCK1	0.0038692	0.00382701	0.0558537
SCARA5	-0.00331161	0.00397936	0.0565487
Gal4	-0.00669089	0.00506724	0.0696612
CD5	-0.00541454	0.00516009	0.0696612
JAMB	-0.00522449	0.00608414	0.0801326
EPHB6	-0.00433276	0.0067602	0.0869168
CD300E	-0.00689625	0.00741194	0.0930802
CD4	-0.00404491	0.00805056	0.0961942
UMOD	0.00431427	0.00818433	0.0961942
CST3	-0.00572053	0.00819432	0.0961942
VASN	-0.00343881	0.00866189	0.0995196
PGF	-0.00382157	0.00934152	0.105092
FAS	-0.00374125	0.0104413	0.112887
CLM6	-0.00375398	0.0106591	0.112887
IGFBP7	-0.00415442	0.0113338	0.112887
LTBR	-0.00428713	0.0113769	0.112887
CD22	-0.00707504	0.0114132	0.112887
IGFBP3	0.00477086	0.0116063	0.112887
IGFBP6	-0.00499158	0.0116616	0.112887
CD93	-0.0036714	0.012081	0.112887
Dkk4	-0.00624919	0.0121113	0.112887
FGF21	-0.0144017	0.0122315	0.112887
LAIR2	-0.0120484	0.0123687	0.112887
TM	-0.0036639	0.0126275	0.112887
IL6	-0.00954529	0.012752	0.112887
CD8A	-0.00854459	0.0132633	0.115519
MMP12	-0.00687448	0.0138053	0.118277
THY1	-0.0030124	0.014018	0.118277
TF	-0.00361247	0.0158068	0.129662
PVR	-0.00328178	0.0158476	0.129662
MB	-0.00623515	0.0170626	0.134435
IL12	-0.00777809	0.0170725	0.134435
ALCAM	-0.00258214	0.0171779	0.134435
CRTAM	-0.00602705	0.017995	0.137595
SOD2	0.00127755	0.0180912	0.137595
KLK6	-0.00397016	0.0192166	0.144125
MDGA1	-0.00678118	0.0198308	0.146693
CD59	-0.00393144	0.0202954	0.147564
MAPT	-0.00172477	0.020495	0.147564
CSF1	-0.00222097	0.0208119	0.147874
TLT2	-0.00474428	0.0212704	0.149169
CDCP1	-0.00531049	0.021815	0.149579
TR	-0.00517333	0.0218828	0.149579
N2DL2	-0.00486421	0.0224659	0.151645
CLEC10A	-0.00453476	0.024534	0.16356
REG1A	-0.00607654	0.0258116	0.169979
RGMB	-0.00360122	0.0265396	0.172667
IL10	-0.00565976	0.0288137	0.181161
OSMR	-0.00173965	0.0289215	0.181161
IL10RA	-0.00755038	0.0290233	0.181161
NID1	0.00435959	0.029187	0.181161
OPN	-0.0052704	0.029845	0.18199
SHPS1	-0.00407275	0.0299947	0.18199
IL4RA	-0.00364644	0.0309082	0.184996
HLAE	-0.00428988	0.0311753	0.184996
SPON1	-0.00340176	0.0315245	0.185035
EZR	-0.0029357	0.0319514	0.185524
PDGFRalpha	-0.00278925	0.0332756	0.191158
MFAP5	-0.0035065	0.0354367	0.200614
PI3	-0.00636647	0.0359934	0.200614
IL12B	-0.00674669	0.0363955	0.200614
CCL18	-0.00622124	0.0364076	0.200614
CCL16	-0.00662495	0.0378594	0.206506
PRSS8	-0.00334244	0.0388207	0.209632
CCL15	-0.00514091	0.0394157	0.210737
CCL14	-0.00391861	0.0398191	0.210807
SCG2	-0.00395881	0.0404882	0.212268
IL1RT1	-0.00241726	0.0427111	0.221769
TNFRSF13B	-0.00437266	0.0449414	0.231127
CLM1	-0.00787427	0.0460745	0.231608
CNTN5	0.00389096	0.0461963	0.231608
CXCL16	-0.00291926	0.0463216	0.231608
APOM	0.0029941	0.0478188	0.236901
BetaNGF	-0.00287655	0.0482622	0.236923
TWEAK	0.00274771	0.0489314	0.238045
CDH5	-0.00302105	0.0502212	0.238184
IL1ra	-0.00603376	0.0506576	0.238184
THBS4	0.00509826	0.0507086	0.238184
REG3A	-0.00253067	0.0507245	0.238184
TSLP	0.00412999	0.0538106	0.250497
MERTK	-0.00312455	0.0544126	0.251135
HMBS	-0.00565558	0.0572421	0.261955
DPP4	0.00285987	0.0579973	0.263181
MANSC1	-0.00219732	0.0619008	0.276986
NCS1	-0.00302958	0.0620653	0.276986
CNDP1	0.00579212	0.063058	0.279109
BMP6	0.00362499	0.0642065	0.281882
SMOC2	-0.00345133	0.0650114	0.283114
X4EBP1	-0.00711052	0.0690888	0.298464
IL2	0.00154875	0.0703587	0.301537
MMP10	-0.00534545	0.0734345	0.309866
FGF23	-0.00561513	0.0734497	0.309866
PON3	0.00585652	0.074904	0.313552
CA1	-0.00742556	0.0793751	0.329712
NCAM1	0.00217014	0.0817449	0.336964
FLRT2	-0.00219987	0.0831575	0.34019
LTBP2	0.00290618	0.0864442	0.350977
SRC	0.00558395	0.0883299	0.354974
AFP	0.00539495	0.0887436	0.354974
SCGN	-0.00456166	0.0934988	0.369803
GDF2	0.00263635	0.0938203	0.369803
IL10RB	-0.00239306	0.098819	0.383194
SAA4	0.00403167	0.0999294	0.383194
UBAC1	-0.00365946	0.100073	0.383194
IL5Ralpha	0.00523989	0.100763	0.383194
F7	-0.00286312	0.100766	0.383194
IL2RA	-0.0034683	0.101484	0.383228
VWC2	-0.00361183	0.109151	0.409317
IL15RA	-0.00248949	0.111262	0.414357
IL22RA1	0.00417366	0.114036	0.421778
MYO9B	-0.00579608	0.11684	0.429206
CD84	0.00269415	0.118793	0.429758
RGMA	-0.00201916	0.119534	0.429758
NT3	0.00356567	0.120724	0.429758
SCGB3A2	-0.00566381	0.120798	0.429758
XCL1	-0.00396246	0.120969	0.429758
LCN2	-0.0035186	0.124408	0.439086
RFNG	-0.00254671	0.127755	0.447974
COL1A1	-0.00288078	0.130602	0.453358
DNER	0.00154834	0.13097	0.453358
CCL5	0.00689683	0.132231	0.454809
SPON2	-0.00192075	0.13562	0.460569
AMBP	-0.0013406	0.135711	0.460569
GDNFRalpha3	-0.00216939	0.137624	0.460569
MANF	0.00439409	0.139422	0.460569
MSR1	-0.00238287	0.13945	0.460569
IL33	0.00203109	0.139568	0.460569
AXL	-0.00222028	0.139877	0.460569
CX3CL1	-0.0028556	0.142971	0.467904
hOSCAR	-0.00148632	0.144643	0.470525
NCAN	0.00203908	0.146915	0.475055
TRAIL	-0.00176121	0.149034	0.479038
VCAM1	-0.00210764	0.152304	0.484973
ADAM22	-0.00268612	0.152677	0.484973
PRELP	-0.00133911	0.156009	0.487598
MEPE	-0.00285763	0.158845	0.487598
ADAM23	-0.0028652	0.158954	0.487598
IL16	-0.003872	0.160109	0.487598
CCL20	-0.00663468	0.160162	0.487598
IGFBP2	-0.00375598	0.160799	0.487598
IL1RT2	-0.00203582	0.161788	0.487598
OPG	-0.00232864	0.163103	0.487598
CCL19	-0.00567906	0.163511	0.487598
CDH1	-0.00250287	0.163869	0.487598
IL20	-0.00265874	0.164722	0.487598
ANGPTL3	-0.00268991	0.165259	0.487598
SMPD1	-0.00258357	0.165385	0.487598
PGLYRP1	-0.00357657	0.166144	0.487598
PSMD9	-0.00433491	0.167783	0.489746
LAT	0.00621693	0.172285	0.500183
TIE1	0.00155639	0.176454	0.506825
IL17RA	-0.00331531	0.176828	0.506825
AIF1	-0.00297157	0.17807	0.506825
CRTAC1	0.00401345	0.178327	0.506825
DRAXIN	-0.00291499	0.180594	0.508363
GH	0.00874081	0.181947	0.508363
FLT3	0.00237974	0.182397	0.508363
TGM2	-0.00387112	0.183659	0.508363
Siglec9	-0.00203976	0.183916	0.508363
TGFBR3	-0.0022044	0.184779	0.508363
RETN	-0.00326948	0.185458	0.508363
SOD1	-0.00370933	0.188755	0.510605
FUS	-0.00426494	0.188831	0.510605
GMCSFRalpha	-0.00399825	0.189113	0.510605
CR2	-0.0031028	0.190166	0.510894
LYVE1	-0.00209636	0.191598	0.512193
LSP1	-0.00314681	0.192641	0.512445
SCARF2	-0.00178247	0.194055	0.513609
GZMA	-0.00271521	0.194981	0.513609
TNFRSF21	-0.00118877	0.196472	0.515024
ACTN4	-0.00186032	0.203237	0.530182
PRTN3	-0.00364594	0.205064	0.532376
IL17D	-0.00186729	0.218306	0.564043
COL18A1	-0.00218573	0.224108	0.575405
PSGL1	0.00220513	0.224834	0.575405
ELOA	-0.00489272	0.226548	0.576245
CHL1	-0.00174507	0.227297	0.576245
VEGFA	-0.00260334	0.229786	0.579833
DEFA1	-0.00280773	0.235921	0.592204
CD46	-0.0022018	0.236882	0.592204
RAB6A	0.00142733	0.241315	0.599476
CPA2	-0.00309641	0.242011	0.599476
IL18R1	-0.00207063	0.245668	0.605756
NTproBNP	-0.00588535	0.250717	0.610564
CD6	-0.00305341	0.252612	0.610564
IL17A	-0.00364587	0.252782	0.610564
PDL1	-0.00218228	0.255481	0.610564
BMP4	0.00192733	0.255845	0.610564
HBEGF	0.00369082	0.257936	0.610564
STK4	0.00440823	0.257971	0.610564
TGFBI	0.00174773	0.258521	0.610564
WFIKKN1	-0.00227804	0.259817	0.610564
DECR1	0.00596328	0.259876	0.610564
BRK1	-0.00198189	0.260715	0.610564
SERPINA12	0.00583641	0.261186	0.610564
CCT5	-0.00242442	0.268509	0.624146
HAGH	-0.00535973	0.269307	0.624146
FOXO3	-0.00435552	0.27153	0.626607
CST5	-0.00264782	0.273573	0.628555
PDGFsubunitB	0.00365829	0.275186	0.628555
BCAN	0.00200608	0.275866	0.628555
CTRC	0.00411866	0.282252	0.640405
IL8	-0.00413852	0.284111	0.641925
CBLN4	0.00216199	0.287813	0.646491
CXCL1	-0.00404716	0.289379	0.646491
IFNgamma	0.00479573	0.289879	0.646491
MCP1	-0.00217885	0.291946	0.646491
MEGF9	0.00125274	0.292731	0.646491
IL24	0.00322882	0.293315	0.646491
Notch3	-0.00162262	0.301534	0.658469
PRSS2	-0.0029405	0.301926	0.658469
SELL	0.00149155	0.302408	0.658469
CD40	-0.0020041	0.307911	0.667759
RSPO1	-0.00159286	0.309502	0.668525
CD40L	0.00487233	0.313426	0.670951
VMO1	-0.00325439	0.313524	0.670951
LILRB1	-0.00153596	0.318032	0.670951
CTSC	0.00181238	0.318793	0.670951
TNFB	-0.00200377	0.319349	0.670951
KLK4	-0.00384463	0.321319	0.670951
PARP1	-0.0041966	0.322137	0.670951
MMP7	-0.00566712	0.322709	0.670951
AGRP	-0.00175898	0.323205	0.670951
C1QTNF1	0.00212607	0.324263	0.670951
PTPRM	-0.00137652	0.325162	0.670951
PLTP	0.00125032	0.326748	0.670951
EFEMP1	-0.00174582	0.329696	0.670951
CHI3L1	-0.00420871	0.330828	0.670951
Dkk1	0.00278215	0.33259	0.670951
CES1	-0.00303108	0.3328	0.670951
ANGPT1	0.00406038	0.333637	0.670951
PAR1	-0.00145499	0.334112	0.670951
GT	-0.00308187	0.334233	0.670951
LXN	-0.00142142	0.338608	0.677217
VAT1	-0.000986706	0.340424	0.678336
SORT1	0.00112999	0.353772	0.697955
PLXNB1	0.0019941	0.353978	0.697955
ICAM2	-0.00145496	0.354613	0.697955
FLT1	-0.000921711	0.35544	0.697955
LACTB2	-0.00323116	0.357544	0.699543
LIF	0.00185051	0.35998	0.700882
Flt3L	0.00177902	0.360824	0.700882
GRN	-0.00123068	0.368385	0.710097
CCL3	-0.00321709	0.368859	0.710097
SCF	-0.00125421	0.369514	0.710097
NTRK3	0.000983763	0.37265	0.710401
CFHR5	-0.00148195	0.37321	0.710401
ICAM3	0.00132426	0.375879	0.710401
PLA2G7	0.00156945	0.376101	0.710401
IgGFcreceptorIIb	0.00323959	0.376249	0.710401
TIMD4	-0.00207468	0.38021	0.713071
PCDH1	-0.000808209	0.380305	0.713071
AXIN1	0.00406737	0.381773	0.713348
CLIP2	0.00458174	0.387645	0.719437
GIF	-0.00411949	0.387697	0.719437
KIM1	-0.00315552	0.395087	0.73064
CD200R1	-0.00128745	0.396871	0.731434
ICAM1	-0.00117415	0.401353	0.733331
IL4	-0.00292151	0.401969	0.733331
CXCL5	0.00408888	0.404644	0.733331
COMP	0.00162007	0.405481	0.733331
OSM	-0.00341128	0.406175	0.733331
MCP2	-0.00245796	0.406863	0.733331
FCGR2A	0.00220567	0.408099	0.733331
NRP1	-0.000814202	0.408764	0.733331
IDUA	-0.0016867	0.410148	0.733376
PDGFsubunitA	0.0029338	0.41233	0.734845
SLAMF7	0.00232568	0.416387	0.738068
CCL11	-0.00148017	0.416872	0.738068
LEP	-0.00333683	0.420255	0.741627
HBQ1	-0.00310898	0.424515	0.744948
ENRAGE	-0.00309134	0.424896	0.744948
CXCL11	0.00354461	0.427419	0.744966
TNR	0.00191878	0.427666	0.744966
DLK1	-0.00211428	0.431666	0.747826
SERPINA5	-0.00114983	0.432077	0.747826
TCN2	-0.00133966	0.436073	0.7515
TXNDC15	0.000721697	0.436983	0.7515
SELE	-0.00201257	0.439024	0.751648
MET	0.000833137	0.439853	0.751648
VEGFD	-0.00118311	0.442617	0.753984
CDH3	-0.00138822	0.448973	0.760776
PRSS27	-0.0015832	0.449422	0.760776
CCL24	0.00302703	0.452372	0.763378
FGF19	-0.0033182	0.454271	0.764194
AOC3	0.00107394	0.45697	0.766348
CCL25	-0.00161001	0.46269	0.773537
TNFAIP8	-0.00152352	0.465622	0.776037
IGLC2	-0.00182664	0.470866	0.782362
HEXA	-0.000585413	0.472936	0.783391
IL6RA	-0.00127472	0.475076	0.784529
PTP4A1	0.00161648	0.477819	0.786654
IGFBP1	-0.00289915	0.481318	0.790005
ADAMTS13	-0.000541049	0.484065	0.790455
GDF8	-0.00184719	0.48452	0.790455
CCL4	-0.00224113	0.490055	0.795099
IL17F	-0.0021129	0.490946	0.795099
JCHAIN	0.00154945	0.491784	0.795099
INPP1	-0.00153804	0.49862	0.800246
TMPRSS5	0.0011551	0.500325	0.800246
TPMT	0.00145673	0.50352	0.800246
GNLY	-0.00160497	0.503949	0.800246
MLN	0.00298731	0.509731	0.800246
NPY	-0.00168014	0.510604	0.800246
IL2RB	0.0013997	0.511979	0.800246
YTHDF3	-0.00277623	0.514217	0.800246
PRCP	0.000952541	0.514274	0.800246
PDL2	-0.00106387	0.515363	0.800246
CCL28	-0.00112207	0.516998	0.800246
MMP1	0.00351114	0.519661	0.800246
GCP5	0.00176781	0.519713	0.800246
CA4	-0.000920264	0.520427	0.800246
FABP2	-0.00202201	0.522201	0.800246
MMP2	0.0010644	0.523044	0.800246
KIT	-0.00096054	0.523879	0.800246
CDC27	-0.00232675	0.523903	0.800246
VWA1	0.00127642	0.524018	0.800246
C2	-0.000967905	0.524606	0.800246
CA5A	-0.00233792	0.527872	0.802961
CCL17	0.002682	0.532893	0.807914
SERPINA7	-0.000842493	0.534121	0.807914
F11	0.00080711	0.536566	0.809346
LDLreceptor	0.00144495	0.543574	0.813174
PIgR	-0.000420625	0.543996	0.813174
FcRL2	-0.00187111	0.545148	0.813174
ENG	-0.000600353	0.545747	0.813174
IL5	0.0024088	0.546634	0.813174
PTX3	-0.00127456	0.550396	0.816522
GCSF	-0.00155183	0.554464	0.81947
vWF	0.00221213	0.555419	0.81947
PAPPA	-0.00171105	0.557938	0.820063
ROBO2	0.000873461	0.558858	0.820063
GPA33	0.00347885	0.563615	0.822838
NT5C3A	-0.00259074	0.564012	0.822838
IL7	0.0018122	0.56532	0.822838
AZU1	-0.00239651	0.567923	0.823824
TRAP	-0.000887654	0.570329	0.823824
ARTN	-0.00125756	0.570575	0.823824
IL13	0.0018045	0.572778	0.8248
CLEC1B	0.00193504	0.575606	0.826669
GALNT7	0.000634899	0.579279	0.829633
TRANCE	-0.00143013	0.580743	0.829633
NAAA	-0.00146061	0.582951	0.829973
PROC	0.000802182	0.584055	0.829973
CEACAM8	-0.00160953	0.58711	0.832124
MMP9	-0.0020367	0.591376	0.833794
ATP6V1D	-0.00145932	0.591376	0.833794
ITGB1BP2	0.00263872	0.599519	0.843073
CPB1	-0.0016168	0.605421	0.849162
MARCO	0.0011121	0.611653	0.855309
SLAMF1	0.000808645	0.612983	0.855309
CHIT1	-0.00317995	0.614555	0.855309
TNC	0.00128118	0.619685	0.860231
NBL1	-0.000413193	0.625497	0.866073
ST2	-0.00111223	0.629257	0.869051
ITGB2	0.000893101	0.632383	0.87114
NRP2	0.00041141	0.637137	0.874097
ADA	-0.001031	0.637767	0.874097
TIE2	-0.000464878	0.640152	0.875144
NOTCH1	-0.00039629	0.642128	0.87563
uPA	-0.000759758	0.644837	0.877109
LPL	-0.000855949	0.647288	0.877349
CDHR2	0.00197008	0.650544	0.877349
ANG	-0.000840637	0.651897	0.877349
THPO	0.000754602	0.65198	0.877349
PSPN	-0.00182129	0.653137	0.877349
CD200	-0.000599943	0.654925	0.877567
TGFalpha	-0.00106109	0.659147	0.881038
GDNF	-0.000811862	0.661846	0.882462
IFNGR2	-0.00116029	0.668237	0.884823
CXCL9	-0.00146662	0.67194	0.884823
NCDase	-0.00111572	0.673969	0.884823
LILRB2	-0.00069168	0.677339	0.884823
FGF5	0.000514085	0.679448	0.884823
IL1B	-0.00193924	0.680438	0.884823
DRG2	-0.00100298	0.680746	0.884823
TBL1X	-0.00141553	0.683211	0.884823
APN	0.000509191	0.683657	0.884823
ALPP	-0.00199901	0.686135	0.884823
TNXB	-0.000491308	0.686183	0.884823
GAS6	0.000728846	0.686414	0.884823
DCTPP1	-0.000630043	0.686904	0.884823
CASP3	0.00179522	0.688412	0.884823
FAP	0.000510323	0.689853	0.884823
CD38	-0.000690045	0.690414	0.884823
PAM	0.000533851	0.691472	0.884823
IL20RA	0.000778343	0.696584	0.887521
GFER	-0.00125342	0.696916	0.887521
LAP3	0.000896741	0.698512	0.887521
FETUB	0.000712193	0.703496	0.887985
FCGR3B	0.00095373	0.70536	0.887985
MATN3	0.000714536	0.70632	0.887985
SCLY	0.000821049	0.707478	0.887985
QPCT	0.000609873	0.708822	0.887985
PCOLCE	-0.000852742	0.713551	0.887985
TPT1	0.000950332	0.713991	0.887985
IL18	-0.00114169	0.714777	0.887985
CALCOCO1	0.00182069	0.714906	0.887985
TIMP4	-0.000807632	0.715321	0.887985
NRTN	0.000638729	0.719749	0.891433
CDH6	0.000401134	0.730392	0.899304
BLMhydrolase	0.00060666	0.73174	0.899304
PRTG	-0.00044512	0.732478	0.899304
PCSK9	-0.000545151	0.732766	0.899304
FS	-0.000590251	0.734505	0.899394
GLO1	0.00120821	0.736663	0.899996
DDR1	-0.000303593	0.739869	0.90038
MPO	-0.000664588	0.740313	0.90038
EpCAM	0.00149144	0.745462	0.900679
NTRK2	-0.000265422	0.746565	0.900679
tPA	0.00095109	0.74716	0.900679
NEMO	0.00137762	0.747433	0.900679
CNTN1	0.000493897	0.749479	0.900679
EGFR	-0.000273402	0.753161	0.900679
PTPRS	-0.000367954	0.754206	0.900679
MMP3	-0.000883288	0.756497	0.900679
C1QA	-0.00046526	0.756649	0.900679
GP1BA	0.000775949	0.7579	0.900679
PLXNB3	0.000744037	0.759014	0.900679
TIMP1	-0.000482819	0.760574	0.900679
TNFSF14	-0.000942464	0.767587	0.906996
CD163	0.000574818	0.775517	0.914365
ERP44	-0.000509205	0.782947	0.919158
VPS37A	-0.000826443	0.786744	0.919158
CXCL10	0.00102126	0.787433	0.919158
HSP27	0.000487126	0.788785	0.919158
LIFR	0.000297931	0.790909	0.919158
CGB3	0.000793141	0.790931	0.919158
LILRB5	-0.000833617	0.791497	0.919158
JAMA	-0.000944762	0.797473	0.921261
HO1	0.000401005	0.797494	0.921261
VPS53	0.000977078	0.798715	0.921261
CPA1	-0.000862482	0.800498	0.921261
S100A16	-0.000771105	0.801839	0.921261
NMNAT1	-0.00141739	0.808837	0.926477
SFTPA1	-0.000726371	0.81056	0.926477
ARHGAP25	0.00068768	0.81599	0.926477
RP2	0.00057095	0.821305	0.926477
L1CAM	0.000225279	0.822371	0.926477
DCN	0.00032647	0.822456	0.926477
LOX1	0.000659122	0.823025	0.926477
ITGAM	0.000495406	0.823627	0.926477
CNPY2	0.000670433	0.823675	0.926477
REN	-0.000869219	0.826421	0.926477
GP6	0.000599635	0.827682	0.926477
GOPC	0.00108615	0.828524	0.926477
GGA1	-0.000483349	0.828682	0.926477
IL1RL2	-0.000377045	0.832529	0.927889
IL1alpha	0.000345167	0.834954	0.927889
PAI	0.00071759	0.837251	0.927889
LAPTGFbeta1	0.000442495	0.837434	0.927889
PLXNB2	0.00024673	0.838537	0.927889
HGF	0.000356756	0.840546	0.928211
sFRP3	0.000338704	0.846104	0.932441
FCN2	0.000493697	0.850989	0.93297
CTSS	-0.000167699	0.851982	0.93297
IL27	0.000357208	0.852178	0.93297
GAMT	0.000513251	0.853495	0.93297
TNF	-0.000431188	0.856285	0.933122
Alpha2MRAP	-0.000553012	0.85709	0.933122
ACAA1	-0.000590736	0.872695	0.9482
SPARCL1	0.000197776	0.878431	0.952516
CCL23	-0.000306713	0.881666	0.954107
SIGLEC1	-0.000303528	0.884848	0.954521
AKR1B1	-0.000481672	0.885583	0.954521
gal8	-0.000394183	0.889204	0.956514
CXCL14	0.000298308	0.891093	0.956641
ICAM5	-0.000212528	0.899772	0.963139
ICAM4	0.000294169	0.900714	0.963139
TFPI	-0.000178037	0.904513	0.964751
ACE2	0.000264467	0.906267	0.964751
CTSD	-0.000246629	0.90758	0.964751
ST1A1	-0.000423058	0.910071	0.965498
ST6GAL1	-0.000177113	0.912065	0.965716
CPVL	-0.000224951	0.916092	0.968082
IL7R	-0.000233126	0.91795	0.968151
CXCL6	0.0003995	0.922643	0.971203
NrCAM	7.19811e-05	0.928741	0.973734
NEP	0.00028711	0.930895	0.973734
SELP	-0.00027737	0.931237	0.973734
SEPT9	8.29704e-05	0.933285	0.973734
BNP	-0.000492046	0.934063	0.973734
PSPD	-0.000259816	0.936373	0.974261
IL17C	-0.000201496	0.941086	0.976898
CASP2	0.000285086	0.942526	0.976898
BOC	-7.09409e-05	0.95014	0.982903
MBL2	-0.000330789	0.953756	0.984758
PECAM1	-0.000137809	0.958802	0.98595
NAMPT	-0.000250317	0.959728	0.98595
USO1	0.000217802	0.961447	0.98595
RAGE	9.18372e-05	0.962215	0.98595
CTSL1	7.73454e-05	0.96409	0.986001
CASP8	0.00013845	0.966047	0.986135
TNFSF13B	-6.44021e-05	0.970043	0.987087
CPM	-4.2473e-05	0.970635	0.987087
COL9A1	-9.21492e-05	0.972883	0.987513
STAMBP	0.000117612	0.978066	0.990844
MCP4	-7.39939e-05	0.982905	0.990844
KYNU	5.01635e-05	0.983019	0.990844
AIMP1	8.39066e-05	0.983687	0.990844
THBS2	1.93582e-05	0.985339	0.990844
SIRT2	-8.09085e-05	0.987942	0.991615
CD244	1.42958e-05	0.993531	0.995374
HAOX1	1.64145e-05	0.997699	0.997699

## Sheet: S6. UKB menoage race adj
Table S6. Results of linear models testing associations of age at menopause with proteins in UKB, adjusted for chronological age and race/ethnicity.
protein	beta	p	FDR p
GDF15	-0.0106459	6.73853e-37	1.96361e-33
PLAUR	-0.00583152	4.81364e-25	7.01347e-22
LAMP3	-0.0112256	3.34825e-24	3.25227e-21
CXCL17	-0.00939092	2.30153e-23	1.60039e-20
WFDC2	-0.00803481	2.74604e-23	1.60039e-20
ALPP	-0.0222673	1.4436e-20	7.0111e-18
PRSS8	-0.00758855	6.67942e-19	2.78055e-16
OMD	0.00758217	4.07785e-18	1.48536e-15
LGALS4	-0.0092241	4.66838e-18	1.51152e-15
FAP	0.00461448	5.64293e-18	1.64435e-15
TNFSF13B	-0.00462638	2.30194e-17	6.09805e-15
IGFBP4	-0.00735554	6.6987e-17	1.62667e-14
EDA2R	-0.00581713	3.50117e-16	7.84801e-14
TNFRSF10A	-0.00539609	9.49816e-16	1.97697e-13
WFIKKN2	0.00587389	1.22002e-15	2.37009e-13
FSTL3	-0.00549986	1.56714e-15	2.85415e-13
TNR	0.00692915	2.14962e-15	3.6847e-13
FABP1	-0.0151505	2.51398e-15	4.06985e-13
PIGR	-0.0059051	3.88685e-15	5.9612e-13
VSIG4	-0.00663854	4.41683e-15	6.43531e-13
MSLN	-0.00920161	5.68353e-15	7.88658e-13
TFF2	-0.00892612	6.36941e-15	8.21596e-13
CHI3L1	-0.0119847	6.4848e-15	8.21596e-13
AREG	-0.0065906	1.32409e-14	1.60766e-12
ADM	-0.00466107	1.94025e-14	2.26156e-12
REG4	-0.00725896	5.90963e-14	6.62333e-12
HAVCR2	-0.00548259	7.07864e-14	7.63968e-12
TNFRSF1A	-0.0045475	1.74323e-13	1.8142e-11
FSHB	-0.00904659	2.41178e-13	2.42342e-11
CD302	-0.00455159	2.79776e-13	2.68575e-11
TFF3	-0.00615333	2.85718e-13	2.68575e-11
COL1A1	0.00373216	4.44076e-13	4.04386e-11
ACVRL1	-0.00370692	4.96408e-13	4.33662e-11
NPDC1	-0.00459582	5.05989e-13	4.33662e-11
IL1RN	-0.00908055	5.46596e-13	4.5508e-11
FGF21	-0.0172441	7.10198e-13	5.74866e-11
NECTIN2	-0.00416963	8.5553e-13	6.73788e-11
TFF1	-0.0114552	8.83399e-13	6.77428e-11
TREM2	-0.00730462	9.25952e-13	6.91852e-11
REG3A	-0.00886166	9.64353e-13	7.02531e-11
TNFRSF12A	-0.00492551	1.5677e-12	1.11421e-10
SPON2	-0.00498154	1.63254e-12	1.13268e-10
ICAM1	-0.00404726	3.78447e-12	2.56464e-10
SOST	0.0052819	4.5318e-12	3.00129e-10
TNFRSF1B	-0.0051361	1.01269e-11	6.5577e-10
TNFRSF11A	-0.00545522	1.21268e-11	7.68207e-10
MSMB	-0.00976834	1.52519e-11	9.45615e-10
CSF1	-0.00374394	1.67228e-11	1.01521e-09
ASGR1	-0.00419469	2.2014e-11	1.30916e-09
PTPRN2	-0.00435895	2.59551e-11	1.51266e-09
SPINK1	-0.00557326	2.86159e-11	1.63503e-09
TNFRSF10B	-0.00548875	3.39304e-11	1.90141e-09
LGALS9	-0.00463582	3.63574e-11	1.99897e-09
CHCHD10	-0.00533621	5.24225e-11	2.82887e-09
CD83	-0.00451987	5.45267e-11	2.88892e-09
IL15	-0.00429883	5.65466e-11	2.94244e-09
COLEC12	-0.0035636	6.07851e-11	3.10751e-09
CST3	-0.00391676	6.7543e-11	3.39345e-09
RNASE6	-0.00401724	8.313e-11	4.10578e-09
EFEMP1	-0.00408261	8.87399e-11	4.3098e-09
CDCP1	-0.00640286	9.84518e-11	4.70309e-09
AGRN	-0.00448879	1.0091e-10	4.74278e-09
MMP12	-0.0069301	1.02765e-10	4.75327e-09
WFIKKN1	0.0053527	1.12647e-10	5.12895e-09
TGFA	-0.00607993	1.48066e-10	6.6379e-09
CNTN5	0.00491887	1.70034e-10	7.50724e-09
OCLN	-0.00564655	2.61919e-10	1.13915e-08
FAM3C	-0.00371412	3.23301e-10	1.38544e-08
LILRA5	-0.00416837	3.51453e-10	1.48425e-08
CA6	0.00808318	3.67481e-10	1.52977e-08
FGFR2	-0.00272411	4.15783e-10	1.6975e-08
TIMP1	-0.00362699	4.19424e-10	1.6975e-08
RBP2	-0.00957766	4.32754e-10	1.72746e-08
PIK3IP1	-0.00331916	5.30215e-10	2.0879e-08
CLEC5A	-0.00360524	6.00217e-10	2.33204e-08
FABP4	-0.00752343	6.11201e-10	2.34347e-08
FASLG	0.0045759	6.61771e-10	2.50442e-08
CGA	0.0075255	6.7645e-10	2.52715e-08
CHAD	0.00647473	7.89484e-10	2.9121e-08
CTSZ	-0.00391018	8.28425e-10	3.01754e-08
CCL15	-0.00532586	8.90539e-10	3.20374e-08
CXCL16	-0.00296571	9.0184e-10	3.20483e-08
DCBLD2	-0.00418516	9.47625e-10	3.32696e-08
SPINK6	-0.00664716	1.03996e-09	3.60768e-08
LRP11	-0.00439435	1.35912e-09	4.65938e-08
ANGPT2	-0.00450215	1.42907e-09	4.84221e-08
NECTIN4	-0.00369246	1.61321e-09	5.40333e-08
TGFBR2	-0.00403341	1.80175e-09	5.96626e-08
CTSD	-0.00497991	2.10367e-09	6.8693e-08
SIGLEC1	-0.00531011	2.12161e-09	6.8693e-08
RELT	-0.00339447	2.19228e-09	7.02011e-08
CD300C	-0.00417061	2.54213e-09	8.05192e-08
TNFRSF4	-0.00460097	2.92344e-09	9.16011e-08
RNASET2	-0.00315085	3.48663e-09	1.08086e-07
AMBP	-0.00242066	3.53109e-09	1.08312e-07
ICAM5	-0.00527621	3.94253e-09	1.19672e-07
LAIR1	-0.00468255	4.00242e-09	1.20238e-07
GAL	0.00727579	4.28974e-09	1.27554e-07
TNFRSF14	-0.00357518	4.44176e-09	1.3074e-07
CD59	-0.00278914	4.7652e-09	1.38858e-07
CEACAM6	-0.00472803	5.847e-09	1.68694e-07
ADAMTS15	-0.00563977	6.07483e-09	1.73549e-07
APOF	0.0028476	6.17045e-09	1.73696e-07
CA4	-0.00278304	6.19919e-09	1.73696e-07
CD27	-0.0047969	6.8456e-09	1.89982e-07
EFNA1	-0.00323527	7.83746e-09	2.15456e-07
TNFRSF6B	-0.00654492	8.24067e-09	2.24423e-07
HGF	-0.00421075	8.43934e-09	2.27706e-07
IL1RAP	0.00506093	9.4335e-09	2.52195e-07
KLK4	0.0066721	9.85656e-09	2.61109e-07
CSTB	-0.00498287	1.10005e-08	2.88787e-07
CD99L2	-0.00276818	1.22336e-08	3.18293e-07
CKAP4	-0.00307498	1.44993e-08	3.73903e-07
DPP4	0.00319595	1.50862e-08	3.85625e-07
CHRDL1	-0.00343423	1.6487e-08	4.14834e-07
LEFTY2	0.00528172	1.65136e-08	4.14834e-07
EPHA1	-0.00400762	1.71947e-08	4.2825e-07
PLA2G15	-0.00295373	1.85166e-08	4.5681e-07
CAPG	-0.0066142	1.86549e-08	4.5681e-07
IL10RB	-0.00329995	1.95392e-08	4.74478e-07
GFRA1	-0.00319398	2.00583e-08	4.83057e-07
FOLR2	-0.00338246	2.05553e-08	4.90968e-07
EGFR	0.00180493	2.08359e-08	4.93624e-07
CRELD1	-0.00434492	2.13101e-08	5.00786e-07
LY6D	-0.00420811	2.18256e-08	5.08799e-07
ADAMTS13	0.00254288	2.2851e-08	5.28475e-07
PILRA	-0.00477113	2.32554e-08	5.31063e-07
IL2RA	-0.00461126	2.33274e-08	5.31063e-07
NTRK3	0.00256156	2.35845e-08	5.32753e-07
BTN2A1	-0.00287441	3.04094e-08	6.80571e-07
LILRB4	-0.00509811	3.05953e-08	6.80571e-07
REN	-0.00810312	3.14794e-08	6.94932e-07
CPM	-0.00397606	3.27859e-08	7.18332e-07
CD300E	-0.00471827	3.51952e-08	7.65365e-07
SHISA5	-0.00300624	3.6478e-08	7.86836e-07
CD74	-0.00393151	3.67226e-08	7.86836e-07
TNFSF13	-0.00286619	3.9417e-08	8.38403e-07
EFNA4	-0.0033491	4.14942e-08	8.76188e-07
LGALS1	-0.00392891	4.18363e-08	8.77057e-07
SPINK4	-0.00719108	4.3839e-08	9.04136e-07
CCDC80	-0.00399119	4.40144e-08	9.04136e-07
LAYN	-0.00372071	4.40588e-08	9.04136e-07
COL18A1	-0.00260013	4.65679e-08	9.48943e-07
SPINT1	-0.00266312	5.57771e-08	1.12351e-06
GPR37	-0.00743387	5.59054e-08	1.12351e-06
TNC	-0.00515246	5.64178e-08	1.12604e-06
SCARB2	-0.00352429	5.77955e-08	1.14569e-06
UMOD	0.0060831	6.58906e-08	1.29733e-06
PGF	-0.00266998	7.22533e-08	1.41306e-06
OSM	-0.00785366	8.43598e-08	1.63883e-06
CLEC10A	-0.00384772	8.60023e-08	1.65967e-06
YAP1	-0.00310537	9.06242e-08	1.73736e-06
NCR3LG1	-0.00346403	9.9947e-08	1.90357e-06
NPC2	-0.00358174	1.01225e-07	1.91538e-06
CDH3	0.00373538	1.0794e-07	2.02644e-06
CDH2	-0.00379852	1.08485e-07	2.02644e-06
ADAM9	-0.00311606	1.34257e-07	2.49188e-06
MZB1	-0.0055699	1.36193e-07	2.51181e-06
CLEC6A	-0.00496258	1.41118e-07	2.58628e-06
STC1	-0.00451115	1.43122e-07	2.60661e-06
INHBB	-0.00568473	1.47041e-07	2.66134e-06
IL6	-0.00817888	1.59952e-07	2.87716e-06
IGFBP6	-0.00315964	1.61628e-07	2.88948e-06
LRRN1	0.00406095	1.71588e-07	3.04882e-06
TNFSF11	0.00634407	1.89106e-07	3.33973e-06
FAM3B	-0.00364175	1.91433e-07	3.36046e-06
CRHBP	-0.0029505	1.93855e-07	3.36908e-06
TGOLN2	-0.00271308	1.94237e-07	3.36908e-06
BOC	0.00244471	2.23279e-07	3.8499e-06
CCL7	-0.00629711	2.39119e-07	4.09879e-06
THY1	-0.0030775	2.45537e-07	4.18418e-06
RSPO3	-0.00286603	2.66474e-07	4.51456e-06
SORCS2	-0.00367039	2.70053e-07	4.54875e-06
RNASE1	-0.00277041	3.18585e-07	5.33538e-06
SDC1	-0.00397088	3.41019e-07	5.67845e-06
NTPROBNP	-0.0102106	3.46457e-07	5.73622e-06
CCL3	-0.00619444	3.50385e-07	5.76848e-06
ADAMTSL2	-0.00330866	3.65447e-07	5.98266e-06
ACE2	-0.00509358	4.04936e-07	6.59209e-06
VSIG2	-0.00598776	4.08903e-07	6.61969e-06
S100G	-0.0045431	4.25604e-07	6.85199e-06
COL9A1	-0.00487924	4.31329e-07	6.906e-06
DSC2	-0.00342089	4.35263e-07	6.93091e-06
LTBR	-0.00280066	4.92927e-07	7.80646e-06
GPD1	-0.00545461	5.19345e-07	8.18039e-06
LCN2	-0.00396384	5.93486e-07	9.29795e-06
MRC1	-0.0029754	7.98655e-07	1.24453e-05
RARRES2	-0.00492853	9.34289e-07	1.44815e-05
DLL1	-0.00293724	9.51054e-07	1.46633e-05
PILRB	-0.00564609	1.01263e-06	1.55305e-05
ADAMTS8	0.00441401	1.0219e-06	1.55907e-05
CD14	-0.00400435	1.11132e-06	1.68665e-05
NEFL	-0.00410529	1.1412e-06	1.72303e-05
FABP3	-0.00494051	1.18984e-06	1.78722e-05
SCG2	-0.00310248	1.235e-06	1.84553e-05
CD300LF	-0.00587194	1.2621e-06	1.87641e-05
POLR2F	-0.0033703	1.3525e-06	2.0006e-05
HLA_E	-0.00280954	1.38295e-06	2.0353e-05
EFCAB14	-0.00265232	1.47335e-06	2.15746e-05
CD79B	-0.00434202	1.56804e-06	2.28463e-05
TAFA5	-0.0034608	1.59062e-06	2.306e-05
KRT19	-0.00647888	1.73989e-06	2.50991e-05
SELENOP	0.00210868	1.76264e-06	2.53021e-05
FUT3_FUT5	-0.00435494	2.13281e-06	3.04657e-05
LMNB2	-0.00275883	2.14416e-06	3.04784e-05
NCAM1	0.00269092	2.21647e-06	3.13534e-05
BST2	-0.00506736	2.26387e-06	3.18691e-05
FOLR1	-0.00268132	2.32384e-06	3.25561e-05
PRTN3	-0.00461277	2.63083e-06	3.66806e-05
HJV	-0.00424178	2.71025e-06	3.7608e-05
CCL21	-0.00406885	2.82579e-06	3.90253e-05
CEACAM5	-0.0065349	2.97521e-06	4.07773e-05
NHLRC3	-0.003001	2.98063e-06	4.07773e-05
DDAH1	-0.00415871	3.22002e-06	4.38465e-05
CLEC4D	-0.00582052	3.32201e-06	4.50249e-05
TIMD4	-0.00421192	3.34293e-06	4.50986e-05
MSR1	-0.00423888	3.6104e-06	4.84825e-05
FAS	-0.00301823	3.95347e-06	5.2846e-05
IL18BP	-0.00284754	3.98889e-06	5.29777e-05
RNF149	-0.00291842	3.99969e-06	5.29777e-05
HYAL1	-0.00206561	4.09066e-06	5.39374e-05
OSCAR	-0.00310513	4.11018e-06	5.39507e-05
APOC1	0.00325146	4.12985e-06	5.39658e-05
REG1A	-0.00453959	4.53877e-06	5.90445e-05
SDK2	0.00344375	4.73013e-06	6.12605e-05
RBP5	-0.0054167	5.04634e-06	6.50666e-05
PALM2	-0.00365653	5.12904e-06	6.58415e-05
SPP1	0.00421591	5.3021e-06	6.74885e-05
LCN15	-0.00560914	5.30366e-06	6.74885e-05
SPON1	-0.00290656	5.39282e-06	6.82862e-05
EZR	-0.00219051	5.41321e-06	6.82862e-05
NBL1	-0.0024298	5.44805e-06	6.84293e-05
CCL17	-0.00827493	5.8725e-06	7.33714e-05
ANXA10	-0.00756773	5.89546e-06	7.33714e-05
TIMP4	-0.00369746	5.91705e-06	7.33714e-05
IFI30	-0.00363865	6.06696e-06	7.49115e-05
EPHA2	-0.0028093	6.29655e-06	7.74184e-05
HSPG2	-0.00249755	6.41204e-06	7.85071e-05
B4GALT1	-0.00247253	7.15173e-06	8.7092e-05
TNFRSF11B	-0.00252831	7.17299e-06	8.7092e-05
CLMP	-0.00200196	7.4451e-06	9.00208e-05
IGFBPL1	-0.00305371	7.91513e-06	9.53086e-05
PTGDS	-0.00267444	8.6999e-06	0.000104327
HSPB6	-0.0033177	9.31554e-06	0.000111252
MDK	-0.00456639	9.5816e-06	0.000113962
PRAP1	-0.00413448	9.9113e-06	0.000117405
TOP1	0.00912898	1.0276e-05	0.000121231
FLT3LG	-0.0028547	1.03343e-05	0.000121428
CCL23	-0.00358656	1.06433e-05	0.000124557
MMP1	-0.0081481	1.07694e-05	0.000125528
PRRT3	-0.00339616	1.08826e-05	0.000126342
ATRAID	-0.00267804	1.10941e-05	0.000128287
CHGB	-0.00357331	1.17706e-05	0.000135572
RETN	-0.00371124	1.25386e-05	0.000143848
ADGRG1	-0.00519872	1.25913e-05	0.000143886
AGR2	-0.0089307	1.2938e-05	0.000147271
DLK1	-0.0044735	1.41095e-05	0.000159981
PPP1R14D	-0.00330826	1.44331e-05	0.000163016
ALDH3A1	-0.00571724	1.45038e-05	0.000163182
SERPINB8	-0.00502733	1.47453e-05	0.000165261
ULBP2	-0.00324548	1.5433e-05	0.000172306
SLAMF8	-0.0046421	1.56871e-05	0.000174475
PTPRR	-0.00312463	1.58023e-05	0.000175087
CALCB	-0.0033504	1.5981e-05	0.000176396
VGF	-0.00266468	1.63791e-05	0.000180108
COL6A3	-0.00321335	1.66599e-05	0.000182507
CREG1	-0.00312922	1.69659e-05	0.000185163
CALCA	-0.00472074	1.76463e-05	0.00019187
PON3	0.00266368	1.92517e-05	0.000208548
SMPD1	-0.00401178	1.93326e-05	0.000208649
DEFA1_DEFA1B	-0.00465014	1.95057e-05	0.000209741
SIRPB1	-0.00390009	2.03724e-05	0.000218254
CHGA	-0.00769665	2.08352e-05	0.000222395
CRIM1	-0.00171291	2.17182e-05	0.000230974
CST6	0.00403676	2.28352e-05	0.00024197
GAST	-0.0112296	2.31612e-05	0.000244535
PLTP	0.00294558	2.59937e-05	0.00027345
LHB	-0.00687468	2.67293e-05	0.000280177
ITGAV	0.00135952	2.68602e-05	0.00028054
CCL25	-0.003982	2.75142e-05	0.000286344
CCL16	-0.00440174	2.82106e-05	0.000292547
BSG	-0.00175418	2.91072e-05	0.000300774
LBP	-0.00488651	3.03585e-05	0.000312596
IL4R	-0.00295429	3.12154e-05	0.000320287
PALM	-0.00268152	3.16782e-05	0.000323896
NT5C1A	-0.00280855	3.39161e-05	0.000345565
SERPINF1	-0.00243398	3.61205e-05	0.000366743
MMP9	-0.00504119	3.68096e-05	0.000372441
CALB2	-0.0027445	3.72522e-05	0.000375616
KLK11	-0.00249339	3.76739e-05	0.000377256
MERTK	-0.00209809	3.78112e-05	0.000377256
RTBDN	-0.00239412	3.78671e-05	0.000377256
TNF	-0.00330953	3.79328e-05	0.000377256
ITGA11	0.00282592	3.90158e-05	0.000386707
CGREF1	-0.00345131	4.054e-05	0.000400453
NOS3	-0.00446333	4.3691e-05	0.00043012
EDIL3	-0.00292561	4.66998e-05	0.000457201
TNFRSF19	-0.00253652	4.67556e-05	0.000457201
LTA4H	-0.0047016	4.85586e-05	0.000473243
GUSB	-0.00512687	5.07673e-05	0.000493119
ADAM8	-0.002322	5.46593e-05	0.00052916
GGH	-0.00291204	5.49079e-05	0.000529806
CA14	0.00285367	5.70772e-05	0.000548921
CLUL1	0.00370436	5.97595e-05	0.000572826
CXCL9	-0.00539334	6.3446e-05	0.00060617
IL7R	0.00430562	6.4271e-05	0.000612044
GOLM2	-0.00183695	6.52091e-05	0.000618955
NOS1	-0.0039127	6.55439e-05	0.000620114
NPPB	-0.010297	6.62655e-05	0.000624911
LRIG1	-0.00267838	6.89124e-05	0.000647777
CALB1	-0.0034351	7.27549e-05	0.000681697
CCL4	-0.00551776	7.85732e-05	0.000732085
RBFOX3	-0.00302324	7.87332e-05	0.000732085
CLEC7A	-0.00467378	7.88864e-05	0.000732085
CCL18	-0.00563981	8.06995e-05	0.00074636
KRT8	-0.00508003	8.09368e-05	0.00074636
CHRDL2	0.00399085	8.39604e-05	0.0007718
HIP1R	-0.00336468	8.77676e-05	0.00080426
LUZP2	-0.00348951	8.85668e-05	0.000809039
B2M	-0.00267259	8.91185e-05	0.000811536
CANT1	-0.00160168	8.99788e-05	0.000815248
TGFB1	-0.00294827	9.00858e-05	0.000815248
PHOSPHO1	-0.00234294	9.41953e-05	0.000848496
IGFBP3	0.00212559	9.4342e-05	0.000848496
CD4	-0.00234592	9.55853e-05	0.000857033
MPO	-0.00371872	9.5921e-05	0.000857405
EPHB4	-0.00193253	9.78e-05	0.000871527
LILRB1	-0.00215228	9.87283e-05	0.000877117
OLR1	-0.00460233	9.93476e-05	0.000879936
EDN1	-0.00227717	0.000105419	0.000930879
PGLYRP1	-0.00331496	0.0001154	0.00101594
CCL22	-0.00411856	0.000124587	0.00109351
PVR	-0.00276055	0.000126012	0.0011027
HNMT	-0.00375286	0.000130287	0.00113669
CD46	-0.00216511	0.000135207	0.0011761
CLEC14A	-0.00235689	0.000137817	0.00119523
GM2A	-0.00308422	0.000138359	0.00119638
TPK1	-0.00205842	0.000139124	0.00119762
CCER2	-0.00471218	0.000139325	0.00119762
EGLN1	-0.00421906	0.000154328	0.00131946
CXCL13	-0.00451435	0.000154405	0.00131946
KIAA0319	-0.0023411	0.000156234	0.00133118
LGALS3	-0.00225069	0.000158868	0.00134968
CD80	-0.00253009	0.000162543	0.00137689
TNFRSF21	-0.00203035	0.000163275	0.00137908
SCGB1A1	0.00432303	0.000176436	0.00148594
SULT2A1	-0.00397397	0.000188599	0.00158042
ITPR1	-0.0052523	0.000188739	0.00158042
PENK	-0.00233753	0.000193413	0.00161492
TXNDC15	-0.00201015	0.000194316	0.00161782
SNCG	-0.00531486	0.000196544	0.00162768
TCN2	-0.00224881	0.000196617	0.00162768
HYOU1	-0.00162466	0.000198275	0.00163675
MATN3	-0.00226646	0.000206686	0.00170137
CD99	-0.00142977	0.00022501	0.00184698
VWA1	-0.00307367	0.000235203	0.00192523
LAMP2	-0.0013544	0.000238701	0.00194839
OSMR	-0.00152388	0.000240031	0.00195186
THBS2	-0.00263031	0.000240466	0.00195186
SMOC1	-0.00244352	0.000244281	0.00197732
SEL1L	-0.00237006	0.00026344	0.00212649
VMO1	-0.0048981	0.000265887	0.00214032
GRN	-0.00173549	0.000272767	0.00218391
PM20D1	0.0129159	0.000272882	0.00218391
KAZALD1	0.00327923	0.000273551	0.00218391
TMSB10	-0.0054971	0.000297008	0.0023647
LRRC25	-0.00284857	0.000306117	0.00243059
PON1	0.00187512	0.000314329	0.00247729
SEMA3F	-0.00198516	0.000314382	0.00247729
KLK10	-0.00288494	0.00031455	0.00247729
KLF4	-0.00288229	0.000315798	0.00248042
ADGRG2	0.00201361	0.000318504	0.00249495
OGN	-0.00297714	0.000322948	0.00252298
SPINT2	-0.00296284	0.000325279	0.00253439
CBLN4	0.0022163	0.000328451	0.00254565
SCGB3A2	-0.00656814	0.000328471	0.00254565
APOE	0.00516046	0.000341573	0.00264017
SOD2	-0.00268262	0.000343838	0.00265065
ADAM12	-0.00246136	0.000346334	0.00266285
REG1B	-0.00399762	0.000347626	0.00266575
DDR1	-0.00157586	0.000353564	0.00270188
BCAN	0.00253235	0.000354193	0.00270188
CCL11	-0.00263164	0.00035961	0.00273604
CD300A	-0.0021856	0.000364229	0.00276153
FGL1	-0.00455544	0.000364856	0.00276153
ODAM	0.00399259	0.000375263	0.00283295
NXPH1	-0.00269573	0.000379176	0.00285509
CCL5	-0.00720051	0.000385586	0.00289587
CDH1	-0.00283353	0.000400361	0.0029991
SUMF2	-0.00373329	0.000409745	0.00306035
SEPTIN8	-0.00231227	0.000410637	0.00306035
MAD1L1	-0.00349668	0.000415746	0.00309052
KLK13	-0.00317423	0.000425716	0.00315658
DMP1	0.00444493	0.000431421	0.00319076
OXT	-0.00974597	0.000436744	0.00322196
APOD	0.00307873	0.000445584	0.00327887
L1CAM	-0.0019782	0.000452877	0.00332414
CYTL1	-0.00163996	0.000472098	0.00345652
IL1R1	-0.00153689	0.000502338	0.00366871
TPP1	-0.00311373	0.000506551	0.00369022
ASGR2	-0.00182827	0.000518045	0.00376454
SERPINE1	-0.00470483	0.000526969	0.00381987
SUSD2	-0.00207737	0.000530965	0.00383669
PFDN4	-0.00376574	0.000531923	0.00383669
RAB6A	0.00327734	0.000543899	0.00391338
SCARA5	-0.00200694	0.000551438	0.00395786
GCHFR	-0.00348179	0.000558224	0.00399672
GFOD2	0.00861069	0.000566474	0.00404585
VEGFA	-0.00411045	0.000591693	0.00421563
CDHR2	-0.00565669	0.000621225	0.00441524
MXRA8	0.00220245	0.000641618	0.00454909
IL1RL1	-0.00304473	0.000646274	0.00457098
DPP6	0.0023547	0.000652635	0.00460479
DPY30	-0.004147	0.000676295	0.0047602
IGSF8	-0.00201791	0.000680603	0.00477898
CD38	-0.00210831	0.000701108	0.00491113
PDZK1	-0.00299552	0.000708496	0.00494212
ENPP7	-0.00588578	0.000708924	0.00494212
ANGPTL7	-0.00235661	0.000717573	0.00499047
KRT18	-0.00545054	0.000743396	0.00514161
DKK3	-0.00202692	0.000743409	0.00514161
FABP2	-0.00521829	0.000744598	0.00514161
BPIFB2	-0.00502055	0.000763763	0.00526148
ESAM	-0.00208742	0.000769529	0.00528869
MUC13	-0.00331266	0.000773977	0.00530675
CD48	-0.00196985	0.000796763	0.00545016
CFD	-0.00141692	0.000804607	0.00549093
SCG3	-0.00231242	0.000817118	0.00556328
SLC39A5	-0.00369978	0.000821861	0.00558252
CES2	-0.00364177	0.00084416	0.00572065
GPR158	-0.00248306	0.000855012	0.00578076
BGN	0.00803404	0.000866328	0.0058437
ADAMTS4	-0.00232996	0.000885657	0.00596028
CES1	-0.00544022	0.000892762	0.00599426
CCL14	-0.0026469	0.000897026	0.00600904
FURIN	-0.00243413	0.000902058	0.00602889
EPS8L2	-0.001972	0.000912058	0.00608178
LPCAT2	-0.00269245	0.000937659	0.00623822
IL13RA1	-0.00138755	0.000946335	0.00628159
IL19	-0.00461657	0.000954651	0.00632239
LEP	-0.00622862	0.000958565	0.00633392
HPGDS	0.00246861	0.00103232	0.00680583
CTSV	0.00265857	0.00109378	0.00719476
EPHB6	-0.00204399	0.00111657	0.00732812
IGFBP7	-0.00188692	0.00112525	0.00736851
CCL8	-0.00394099	0.0011324	0.0073987
BLNK	-0.00248234	0.00116803	0.0076144
F9	-0.00124804	0.00117687	0.00765489
TYRP1	-0.00407783	0.00120802	0.00784001
MMP8	-0.00481933	0.00122912	0.00795925
IGSF9	-0.00561238	0.00126836	0.00819515
RRM2	-0.00337054	0.00130604	0.00841994
NPPC	-0.00272472	0.00131113	0.00843406
SERPINA7	-0.00118602	0.00132539	0.00850704
KLKB1	0.00159068	0.00134893	0.0086215
CDH15	0.00287123	0.00134914	0.0086215
MMP10	-0.00370575	0.00139645	0.00890428
SFTPA2	-0.00336558	0.00140333	0.00892859
CEACAM21	-0.00544688	0.00142058	0.00901868
QPCT	-0.00172179	0.00148449	0.0094039
RNASE4	-0.00177441	0.001526	0.00964591
IMMT	-0.00283463	0.0015705	0.00990571
TPR	-0.00308482	0.00158161	0.00995422
TNFRSF9	-0.00261095	0.00159593	0.0100225
ELOA	-0.00343782	0.00160026	0.0100225
SELL	0.00143439	0.00160278	0.0100225
CNTN1	0.00177082	0.00160718	0.0100285
IL16	-0.00265522	0.00163969	0.0102095
TNFRSF10C	-0.00314532	0.00165388	0.0102759
AZU1	-0.00502431	0.0016791	0.0104104
HAVCR1	-0.00387278	0.00172405	0.0106664
IFNL1	-0.00279555	0.00175303	0.0108228
IL15RA	-0.00221272	0.00182203	0.011225
UNC5D	-0.00166646	0.00185586	0.0114092
FGFBP2	0.00307029	0.00187272	0.0114751
IGF2R	-0.00140523	0.00187445	0.0114751
LGMN	-0.00222562	0.00188375	0.0115078
PCSK9	-0.00239546	0.00193779	0.0118132
AHNAK	-0.0020206	0.00197625	0.0120225
CST7	-0.00583098	0.00203642	0.0123628
GPR15L	-0.00369809	0.00204721	0.0124024
IFIT3	-0.00230496	0.00207021	0.0125158
KIR2DL3	-0.00480802	0.00211033	0.0127319
FCGR3B	-0.00309303	0.00211561	0.0127374
LSP1	-0.00249353	0.00213496	0.0128274
TNXB	0.00151586	0.00216497	0.012971
VCAN	-0.00185938	0.00216777	0.012971
MOG	-0.00203578	0.00219364	0.0130989
SFTPD	-0.00406271	0.00220646	0.0131485
ZBTB17	-0.00256574	0.00224274	0.0133374
CRIP2	-0.00227447	0.00225802	0.0134009
TFPI2	-0.0022289	0.00226574	0.0134162
CSPG4	0.00201084	0.0022698	0.0134162
PXN	-0.00322545	0.00227723	0.0134329
ADAMTSL4	-0.00138722	0.0022955	0.0134881
MET	0.00124773	0.00229584	0.0134881
IL4	0.00552818	0.00233217	0.0136739
CD5	-0.00207548	0.00240362	0.0140619
CD7	-0.00265142	0.00240799	0.0140619
CRELD2	-0.00317829	0.00247701	0.014436
BGLAP	0.00549431	0.00248556	0.0144569
ANGPTL4	-0.00273512	0.00251876	0.0146208
CNDP1	0.00273565	0.00255343	0.0147926
SNX2	-0.00477973	0.00258607	0.014952
CD1C	0.00144123	0.00260406	0.0150262
LRG1	-0.00156988	0.0026288	0.0151096
IL18	-0.00291787	0.00262889	0.0151096
APP	-0.00399074	0.00271787	0.0155903
WDR46	-0.0021838	0.00276021	0.0158021
CCL20	-0.00541486	0.00281909	0.0161075
SYT1	-0.00226076	0.00288716	0.0164642
PLXDC1	0.00198857	0.00296315	0.0168645
ACAN	0.00169234	0.00305224	0.0173097
FDX1	-0.00375138	0.00305642	0.0173097
CCN2	-0.00336298	0.00305919	0.0173097
IGSF3	-0.00201222	0.00313575	0.0177085
MANSC1	-0.00160236	0.00318447	0.0179489
APOA1	0.00160237	0.0031935	0.017965
ERP44	-0.00152316	0.00326528	0.0183334
MMP3	-0.00280545	0.00328052	0.0183835
SIGLEC7	-0.00165435	0.00334382	0.0187023
GFAP	-0.00279331	0.00337393	0.0188346
KLK12	-0.00825545	0.00339774	0.0189312
SIGLEC10	-0.00198388	0.00343669	0.0191117
RSPO1	-0.00197523	0.00355164	0.0197133
SNRPB2	-0.00255904	0.00356238	0.0197353
PLIN1	-0.00216284	0.00360236	0.019919
SERPIND1	-0.00163507	0.00363958	0.0200866
CRISP2	0.00363622	0.00366807	0.0202056
PTPRH	0.0027806	0.00368386	0.0202543
IL18RAP	0.0101601	0.00379828	0.0208191
FETUB	-0.0018811	0.00380087	0.0208191
RGMB	-0.00148466	0.00384685	0.0210314
TNFSF14	-0.00335324	0.0038613	0.0210708
SLC13A1	0.00358185	0.00394819	0.0215047
GZMH	-0.00438611	0.0039766	0.0216191
PARP1	-0.00323076	0.00408181	0.0221497
GALNT3	0.00239523	0.0041005	0.0222098
IDUA	-0.00260022	0.00416411	0.0225125
CEACAM8	-0.00286225	0.00418825	0.022601
KIT	0.0017199	0.00419811	0.0226124
PYY	-0.00565562	0.00423871	0.0227889
EPHA10	-0.00372265	0.00425988	0.0228606
NCAM2	0.0015924	0.00429036	0.0229818
S100A11	-0.00271182	0.00440815	0.0235694
PBXIP1	-0.00171141	0.00454977	0.0242821
ENTPD2	0.00249703	0.00470153	0.0250462
GDF2	0.00205839	0.00478589	0.025449
FAM20A	-0.00163168	0.00484724	0.0257283
CLEC3B	0.0011656	0.00488188	0.0258651
ADA2	-0.00235396	0.00490806	0.0259266
CXCL10	-0.00380773	0.00491128	0.0259266
SRP14	-0.00344364	0.00493254	0.0259917
PLAT	-0.00298991	0.00496998	0.0261418
MFAP5	-0.00240946	0.00500274	0.0262667
THBS4	0.00260222	0.00502823	0.026353
LILRB2	-0.00194464	0.00506179	0.0264812
SPOCK1	0.00141509	0.0051416	0.0268506
POF1B	-0.00259419	0.00542735	0.0282921
LYPD8	-0.00280772	0.00547058	0.0284666
RASSF2	-0.00314646	0.00553206	0.0287352
STX1B	-0.00238669	0.00568832	0.0294942
ALCAM	-0.00106131	0.00575326	0.029778
TNFSF10	0.00137451	0.0059554	0.0307696
MAPK13	-0.00234495	0.00610383	0.0314806
ACP5	-0.00165799	0.00628596	0.0323627
APBB1IP	-0.00250207	0.00632153	0.0324884
RTN4R	-0.00201146	0.00655549	0.0336315
CTSH	-0.0039466	0.00657615	0.0336782
NID1	-0.00214731	0.00662096	0.033834
INSL5	-0.00511712	0.00662979	0.033834
PRSS2	-0.00273164	0.00667826	0.0340218
F3	-0.00149496	0.00680534	0.0346087
SIGLEC8	-0.00241647	0.00689316	0.0349942
CA12	-0.00168411	0.00690792	0.0350081
ITGA5	-0.00137908	0.00696146	0.0352182
ZBP1	-0.00220381	0.00712095	0.0359627
DTNB	-0.00225317	0.00721119	0.0363554
INSL4	-0.00271855	0.00734842	0.0369733
CLEC4M	0.00260018	0.00736225	0.0369733
LILRA3	-0.00734603	0.00737666	0.0369733
PCDH17	0.00185818	0.00738451	0.0369733
SFTPA1	-0.0031144	0.00741514	0.037063
LEO1	-0.00168588	0.00750187	0.0374323
CD36	-0.00239118	0.00751647	0.037441
NOMO1	-0.00129308	0.00754307	0.0374528
ISM1	-0.0020469	0.00754454	0.0374528
DEFB4A_DEFB4B	-0.00807815	0.00756432	0.0374683
BTD	0.00110303	0.00757337	0.0374683
COCH	-0.00247454	0.0076504	0.0377731
ISLR2	-0.00197667	0.00766091	0.0377731
NPHS1	0.00177038	0.00772558	0.0380276
NPTXR	-0.00182745	0.00795272	0.0390796
INHBC	-0.00248657	0.00802974	0.0393917
ASPN	0.00146755	0.00805417	0.0393923
IGLC2	-0.00130706	0.0080569	0.0393923
ECI2	-0.00330476	0.00815548	0.0398075
PAM	-0.00146639	0.00836978	0.0407852
CCL28	-0.00306057	0.00841503	0.0409372
CHCHD6	-0.00148605	0.00856443	0.0415946
THBD	-0.00146197	0.00862403	0.0418143
MTUS1	-0.00289319	0.00883017	0.0427427
ACHE	0.00167761	0.00899482	0.0434675
ARSA	-0.0023121	0.00911029	0.0439526
CLEC4A	0.00178836	0.0092654	0.0446271
MEP1A	-0.00356191	0.00929325	0.0446874
STAB2	-0.00151711	0.00931081	0.044698
FCAR	-0.00248834	0.00936564	0.0448873
MILR1	-0.00263594	0.00944328	0.0451851
GAS6	-0.00132141	0.00947115	0.0452441
FSTL1	-0.00116047	0.0095548	0.045568
CTSO	-0.00157432	0.00957022	0.045568
PSIP1	-0.00330445	0.00963431	0.0457983
BMP10	0.00152067	0.009699	0.0459726
PPBP	-0.00433089	0.00970253	0.0459726
MRPL58	-0.00377604	0.00976476	0.0461924
VEGFB	-0.00153325	0.00982369	0.046267
SORBS1	-0.00209642	0.00982675	0.046267
CWC15	-0.00313984	0.00982816	0.046267
FCAMR	-0.00395433	0.0099807	0.0469093
PDCD1	-0.00224561	0.0100936	0.0473633
EGFL7	-0.00209815	0.0102369	0.0479585
DTX2	0.00329037	0.0103622	0.0484678
CD70	-0.00211643	0.0106624	0.049792
MEPE	0.00133708	0.0107612	0.050173
ARHGAP1	0.00234635	0.0109444	0.0509441
DUSP29	-0.00334413	0.0109616	0.0509441
REXO2	0.00255195	0.0110446	0.0512484
FCRLB	-0.00304127	0.0111187	0.0515104
LAMA4	-0.00163896	0.0111787	0.0516561
AGR3	-0.00304524	0.0111856	0.0516561
PODXL2	-0.00141142	0.0113986	0.052556
FCN1	-0.00288965	0.01165	0.0536307
WNT9A	-0.00142741	0.0117416	0.0539669
CRH	-0.00434441	0.011812	0.0541331
FABP5	-0.00353565	0.0118149	0.0541331
CXADR	-0.00269032	0.0120118	0.054949
BCL2L15	-0.00294856	0.0120722	0.0551384
ANXA5	-0.00150736	0.0122679	0.0558442
CR2	0.00235205	0.0122731	0.0558442
SCRG1	-0.00135773	0.0122931	0.0558442
BPIFB1	-0.00311683	0.0123034	0.0558442
VNN2	-0.00228817	0.0124719	0.0565212
DGKZ	0.00176698	0.0126099	0.0570576
LECT2	-0.00325755	0.012651	0.0571171
CLU	0.00157281	0.0126622	0.0571171
MFAP4	0.00156311	0.0128975	0.0580886
TRIM21	0.00403472	0.0131587	0.0591735
CNTN4	0.00119598	0.0132386	0.0594147
SLURP1	-0.00189717	0.0132531	0.0594147
ANG	-0.00169548	0.0133185	0.0596163
DDC	0.00244041	0.013417	0.0599176
CD55	-0.00127619	0.0134409	0.0599176
GIPC2	-0.00147069	0.0134475	0.0599176
PRG2	-0.00256539	0.0134935	0.0600307
CDON	0.00126693	0.0135472	0.0601775
SFRP1	-0.0022116	0.0136844	0.0606289
CXCL12	-0.00197604	0.0136904	0.0606289
HS6ST2	-0.00149891	0.0138536	0.0612588
SLC9A3R2	-0.00250634	0.0138942	0.0613449
SELE	-0.00254344	0.0139667	0.0615718
SMNDC1	-0.00299228	0.0140199	0.061713
PTGR1	-0.00401456	0.0140697	0.0618389
MFGE8	-0.00203711	0.0143147	0.0628207
SLAMF1	-0.00292477	0.0144804	0.0634524
GNPDA2	0.00177954	0.0145921	0.0637273
ROBO1	-0.001184	0.014608	0.0637273
PCBD1	-0.00232593	0.0146087	0.0637273
FKBP4	-0.00219411	0.0149344	0.0649815
VAMP5	0.00281725	0.0149408	0.0649815
PRSS22	-0.00172494	0.0151843	0.0659421
AKR7L	-0.00340035	0.0152144	0.0659745
SLITRK2	0.00189021	0.0152819	0.0661687
WIF1	0.00167122	0.0153444	0.0663406
TFPI	-0.00147126	0.0154507	0.0667013
A1BG	-0.000828332	0.0155981	0.0672381
GLO1	-0.00288759	0.0156772	0.0674792
DCC	0.00110165	0.0158564	0.0681498
SLAMF7	-0.00275929	0.0159382	0.0684003
SDHB	0.00339589	0.0159678	0.0684265
CD207	-0.00186275	0.0160411	0.0686398
XG	-0.00150497	0.0161281	0.068823
MICB_MICA	-0.00716187	0.0161311	0.068823
SSNA1	-0.00250297	0.0162201	0.0691015
SEZ6L	-0.00135753	0.0162733	0.0691958
PDE1C	-0.00269735	0.0162897	0.0691958
STXBP3	0.00209194	0.0164016	0.0695414
LY9	-0.00138685	0.0164188	0.0695414
CD93	-0.00149649	0.0165078	0.0698169
ECM1	0.00175311	0.0165971	0.0700929
PTPRZ1	0.00159089	0.0166437	0.0701877
CCL27	-0.00277368	0.0167198	0.0704067
NTF3	0.00171722	0.0169027	0.0710743
NFASC	-0.00127029	0.0169853	0.0713187
TRIM24	-0.00314151	0.0171162	0.0717647
MNDA	-0.00483614	0.0174763	0.0731621
XCL1	-0.00264105	0.0174997	0.0731621
BTN3A2	-0.00180284	0.0176364	0.0736132
RIDA	-0.00245038	0.0176581	0.0736132
THOP1	-0.00148248	0.0178337	0.0742392
PRTG	0.00115695	0.0179573	0.0746472
ATRN	0.000787663	0.0180431	0.0748968
VWC2L	-0.00221678	0.018336	0.0760044
CGB3_CGB5_CGB8	-0.00177101	0.0183912	0.0760377
IGDCC4	0.00121738	0.0183962	0.0760377
HEG1	-0.00123988	0.0184379	0.0761
CEACAM1	-0.00102897	0.0184635	0.0761
DTX3	-0.00112723	0.018537	0.0762949
SAFB2	-0.00132766	0.0186965	0.0768382
SERPINA9	-0.00330921	0.0187217	0.0768382
S100P	-0.00255397	0.0189079	0.0774933
PDGFB	-0.00401425	0.0189503	0.0775578
KLK8	-0.00170018	0.0191464	0.0782506
PRL	0.00337041	0.0195035	0.0795984
PTP4A3	-0.00255363	0.0195906	0.0798418
ANGPT1	-0.00394795	0.0199018	0.0809969
SNAP25	-0.00215716	0.020155	0.0817366
APOM	0.00126557	0.0201716	0.0817366
IFIT1	-0.00242051	0.0201934	0.0817366
CFHR4	0.00337368	0.0201957	0.0817366
IL20	0.00233732	0.0203152	0.0820264
BAP18	-0.00314237	0.0203236	0.0820264
BAG6	0.0016717	0.0205398	0.0827843
SLC4A1	0.0021883	0.0207626	0.08351
NT5C3A	0.00406601	0.020799	0.08351
SCN4B	-0.00194792	0.0208059	0.08351
PSAP	-0.00133584	0.0208539	0.0835234
PEAR1	0.00102737	0.0208665	0.0835234
CD5L	0.00212095	0.0211331	0.0844743
SIAE	-0.00214719	0.0217123	0.0866708
SCGN	-0.0020484	0.0218112	0.0869466
HLA_A	-0.0014709	0.0219707	0.0874625
TOP2B	-0.00367337	0.0221363	0.0880016
DEFB118	-0.00273329	0.0222285	0.0882477
AKR1B10	-0.0027485	0.0223054	0.0884325
RRM2B	0.00308874	0.0224024	0.0886963
ASRGL1	0.00465022	0.0224615	0.0888097
IGFBP1	-0.00574062	0.0226533	0.0893914
ANXA1	-0.00197781	0.0226734	0.0893914
FUS	-0.00182248	0.0227006	0.0893914
ADGRF5	-0.00133851	0.0228297	0.0897785
CD163	-0.00201259	0.0228686	0.0898102
ERI1	-0.00155148	0.0229761	0.0901107
PROS1	0.0011089	0.0231197	0.090552
EDAR	0.00413313	0.0232327	0.0908725
GET3	0.00248737	0.0232807	0.0909384
THSD1	0.001533	0.0235517	0.0918738
TCP11	0.00263916	0.0239563	0.0933272
MATN2	-0.00130924	0.0244315	0.0950514
MAPK9	-0.00192103	0.0246141	0.095634
MMP13	0.00148377	0.024723	0.0959291
TG	0.00536641	0.0248245	0.0961942
MB	-0.00222646	0.0248573	0.0961942
BAG3	-0.00180593	0.024917	0.0962971
CSF3R	-0.00140279	0.0249842	0.0963937
TNFRSF8	-0.00204607	0.0250287	0.0963937
COQ7	0.00203371	0.0250412	0.0963937
MMP7	-0.0021229	0.0252384	0.0970245
GLA	-0.00165573	0.0253571	0.097256
ICAM4	0.0023544	0.0253653	0.097256
NUDT15	-0.00229712	0.0254771	0.0975563
NID2	-0.00332203	0.0256211	0.0979789
CEACAM20	-0.00196587	0.0259958	0.0992814
LTBP3	-0.00239868	0.0260999	0.0995486
CRYBB2	-0.00325312	0.0262869	0.100131
SKAP1	-0.00334664	0.0263552	0.10026
CLEC12A	-0.000904708	0.0269362	0.102336
KIF1C	-0.00161763	0.0272078	0.103234
PLA2G2A	-0.0026149	0.0273345	0.10358
LY96	-0.00154386	0.0277165	0.104891
TIGIT	-0.00157111	0.0278534	0.105096
FCGR2B	0.00255076	0.0278634	0.105096
CEP164	-0.00282679	0.027879	0.105096
GSN	0.00083381	0.0280318	0.105536
CD248	0.00174593	0.0283613	0.106638
GKN1	-0.00120501	0.028459	0.106789
TLR2	-0.00101052	0.0284746	0.106789
CPXM1	-0.00305219	0.0285575	0.106962
SPRED2	0.00192824	0.0286887	0.107194
GFRA2	-0.000914644	0.0286929	0.107194
FGFBP1	0.00136678	0.0289696	0.108089
MASP1	0.00100382	0.0290492	0.108247
PI3	-0.0024125	0.0292254	0.108765
SLAMF6	-0.00163398	0.0295932	0.109993
SPRR3	0.00315019	0.0296661	0.110124
TACSTD2	0.00136476	0.0299039	0.110865
SBSN	-0.00147177	0.0299491	0.110892
GHRL	0.00358969	0.0302084	0.11171
JAM2	-0.00110716	0.0303058	0.111928
CCN1	-0.00329012	0.0304588	0.112351
BRK1	-0.0019272	0.030542	0.11239
PKD1	0.00111251	0.0305467	0.11239
TNFRSF13B	-0.00144149	0.0306702	0.112702
CD200R1	0.00147719	0.0308937	0.113288
ACADSB	0.0038563	0.0309259	0.113288
NELL2	-0.00122955	0.0309461	0.113288
DDX58	-0.00249162	0.0310087	0.113374
VWC2	-0.001706	0.0312455	0.114097
FLT1	-0.00090594	0.0315586	0.115069
LETM1	-0.00228352	0.0315907	0.115069
RNF43	-0.00253366	0.0316896	0.115145
SCGB3A1	-0.00111252	0.0316975	0.115145
CLEC4G	-0.00142936	0.0317638	0.115145
NUCB2	-0.00161514	0.0317697	0.115145
CFP	0.000979298	0.0319808	0.115766
TGFBR3	-0.00137625	0.0320744	0.115844
ACP1	0.00193477	0.0320818	0.115844
AKR1C4	0.00233568	0.0321873	0.116081
DHPS	-0.00174841	0.0325297	0.117171
DNM3	-0.00236041	0.0327089	0.117671
COL9A2	-0.00197585	0.0329002	0.118214
SIT1	-0.00246902	0.0331387	0.118924
DPP7	-0.00250411	0.0334517	0.119899
PRSS27	-0.00172312	0.0335231	0.120008
ITIH1	0.000803745	0.033592	0.120107
COL15A1	-0.00118925	0.0337431	0.120499
MCAM	0.0014425	0.0339957	0.121253
HHEX	-0.00321814	0.0340907	0.121443
F2	0.000615497	0.0345336	0.122861
CSNK1D	0.0026838	0.0345986	0.122861
OSTN	0.0017619	0.0346151	0.122861
CDNF	-0.00134669	0.0349183	0.123719
SIGLEC9	-0.00122732	0.0349695	0.123719
BMP4	-0.00189004	0.0350114	0.123719
SSC5D	-0.00180777	0.0350267	0.123719
KLK14	-0.00196315	0.0351874	0.124136
CDSN	-0.00180962	0.0353398	0.124523
LGALS3BP	-0.00131308	0.0357914	0.125961
ITIH3	-0.00156567	0.0365127	0.128345
PDGFA	-0.00300589	0.0365906	0.128427
APLP1	0.00221911	0.0366243	0.128427
BCL2	-0.002346	0.0367408	0.128681
RBP7	-0.00252645	0.0369396	0.129222
DNER	0.00105901	0.0370395	0.129416
SPARC	-0.00292795	0.0374401	0.130659
NOTCH3	0.00141995	0.0376942	0.131389
PTPRF	0.0011893	0.0380869	0.132599
RANGAP1	0.00202666	0.0384717	0.133779
ELOB	-0.00159444	0.0386442	0.134218
MARCO	-0.00109879	0.0388488	0.134768
MANSC4	-0.00276248	0.039092	0.135451
USP28	-0.00152133	0.0393208	0.136082
SFRP4	0.00168591	0.0397275	0.137326
PRCP	-0.00128931	0.0405456	0.139988
DPT	-0.00108304	0.040635	0.140131
STAT2	-0.00314116	0.0413831	0.142542
NCF2	-0.00349588	0.0414872	0.142732
PAXX	-0.00188855	0.041601	0.142954
LTO1	0.0017121	0.0420457	0.144312
ZPR1	0.00393338	0.0423736	0.145267
CXCL8	-0.00280023	0.0426533	0.146054
TNFSF8	-0.00144392	0.042836	0.146507
AHSP	-0.00356157	0.0434228	0.14834
SH2D1A	-0.00223168	0.0441643	0.150697
IFNGR1	-0.000819934	0.0443929	0.151274
PDCD5	-0.00239657	0.0444418	0.151274
FCRL6	-0.00273124	0.0444892	0.151274
GPKOW	-0.00114619	0.0447663	0.152038
RNASE10	-0.00196089	0.045209	0.153275
GPC1	-0.00116063	0.0452356	0.153275
WARS	-0.00149093	0.0455136	0.154038
VSIG10L	-0.00131812	0.0459738	0.155415
GALNT2	0.00102579	0.0466127	0.157392
WASL	0.00248629	0.0469694	0.158413
ALDH1A1	-0.00220395	0.047134	0.158745
ELN	-0.00139266	0.0471768	0.158745
CD86	0.00111289	0.0472484	0.158803
STX6	0.00271594	0.0474198	0.159149
HPSE	-0.00368528	0.0475091	0.159149
MRI1	0.00271203	0.0475153	0.159149
ARHGAP5	-0.00308826	0.048759	0.163127
GRK5	0.00200837	0.0491126	0.164122
PON2	-0.00139182	0.0498313	0.166333
PDCD1LG2	-0.00121555	0.050116	0.167092
GIP	-0.00222192	0.0502703	0.167415
NPR1	0.00153764	0.0510376	0.169776
APOA2	-0.00187108	0.0511906	0.17009
SART1	-0.00141401	0.0521169	0.172769
ARHGAP30	-0.00146359	0.0522431	0.172769
LGALS7_LGALS7B	-0.00156384	0.0522651	0.172769
CEACAM3	0.0018548	0.0522685	0.172769
THPO	-0.00149102	0.0522933	0.172769
STOML2	0.00352085	0.0525539	0.173434
COL5A1	0.00153238	0.0528359	0.174167
MLN	-0.00344813	0.0531501	0.17487
ANGPTL1	-0.00112844	0.0531691	0.17487
PLIN3	-0.00166389	0.0536351	0.176204
CTHRC1	-0.00112006	0.0537415	0.176355
FST	-0.00192061	0.0542118	0.177698
EIF4EBP1	-0.00256565	0.0545549	0.178621
NPTN	0.0031811	0.0548354	0.179338
LRIG3	-0.00109103	0.0552494	0.18049
PRR4	-0.00266598	0.0553577	0.180641
IL18R1	-0.00131004	0.0559551	0.182386
SERPINF2	0.000523352	0.0562836	0.183252
TMPRSS15	-0.00350395	0.056469	0.18365
BNIP3L	-0.00172894	0.0565735	0.183785
NECTIN1	-0.00124564	0.0568247	0.18436
NT5E	0.0022524	0.0568771	0.18436
BTC	0.00281037	0.0572618	0.185401
C2	-0.000910202	0.0573904	0.185611
SUSD4	-0.00161433	0.0575042	0.185773
RNF41	0.00258185	0.0578293	0.186616
EFHD1	-0.00132907	0.0583197	0.187991
TBL1X	0.00322426	0.0584713	0.188237
MTHFD2	-0.000999668	0.0585253	0.188237
B3GNT7	-0.00135111	0.0586743	0.188508
F11R	-0.00214283	0.0588543	0.188878
LBR	-0.00257639	0.0599694	0.192245
SMOC2	-0.00140604	0.0607802	0.19463
LTB	0.00130473	0.0616463	0.197187
RNASE3	-0.00422455	0.0620877	0.198381
EREG	-0.00295711	0.0624551	0.199337
MAGEA3	-0.00312784	0.0629656	0.200744
PEPD	0.000955304	0.0630338	0.200744
HEPACAM2	0.00151088	0.0633315	0.201472
IFNG	-0.00422101	0.0634079	0.201495
IL10RA	-0.00222445	0.0638134	0.202562
POSTN	0.00136119	0.0639426	0.202752
HS3ST3B1	-0.00138741	0.0643111	0.203514
RFC4	-0.000758449	0.0643228	0.203514
CSF2RA	-0.00225845	0.0644013	0.203542
CILP	-0.00201004	0.0644929	0.20361
CLNS1A	0.00125651	0.0648822	0.204618
LHPP	-0.00222147	0.0652057	0.205416
TK1	-0.00162151	0.0660891	0.207974
FBP1	-0.00271666	0.0661886	0.208062
BMPER	-0.000831214	0.0674472	0.21179
PCSK7	-0.0016391	0.0678555	0.212843
KLK6	-0.00112469	0.0682831	0.213954
GIPR	-0.00179604	0.0685705	0.214624
CXCL11	-0.00292789	0.06868	0.214735
KCTD5	-0.0015779	0.0691178	0.215873
C1QA	-0.000791643	0.0697704	0.217595
ARG2	-0.00157653	0.0698185	0.217595
OPTC	-0.00167787	0.0701531	0.218404
HMMR	-0.00177999	0.0703417	0.218757
SCPEP1	-0.0017766	0.0704206	0.218769
KRT5	-0.00174749	0.0707474	0.21955
MDGA1	0.0024833	0.0710249	0.219856
FUT8	-0.00208331	0.0710993	0.219856
PAG1	-0.00205537	0.0711968	0.219856
NADK	-0.00203286	0.0712133	0.219856
GALNT10	-0.000983577	0.0712232	0.219856
CXCL14	-0.00223772	0.0713451	0.22
LRCH4	-0.00249571	0.0717783	0.221101
CRACR2A	0.00315056	0.0724911	0.223061
MZT1	0.00189338	0.0726241	0.223235
GUCA2A	-0.00118862	0.0729484	0.223995
FGF23	-0.001907	0.0731423	0.224354
CEP290	-0.0019505	0.073387	0.224868
IL9	0.00206153	0.0735385	0.225096
UNC79	-0.00200668	0.0751053	0.229513
RABEPK	0.00209188	0.0751391	0.229513
TNFRSF17	-0.00145076	0.0761273	0.232288
RAB37	0.00293994	0.076223	0.232337
DNPEP	-0.00203783	0.0764535	0.232796
SLC39A14	-0.00119958	0.0766614	0.233185
YY1	-0.00100015	0.07729	0.234852
RAP1A	0.00244136	0.0775486	0.235392
TPT1	0.00229662	0.0776661	0.235433
GSTA1	-0.00309607	0.0777236	0.235433
NTRK2	0.000883728	0.0783181	0.236987
CRISP3	0.000945516	0.0784711	0.237204
RCC1	-0.00181765	0.0785543	0.23721
GNLY	-0.0018125	0.0787772	0.237636
SEMA3G	-0.00152188	0.0792035	0.238675
PCDHB15	0.00137008	0.0793288	0.238806
PRKAR1A	0.00296843	0.0794384	0.238889
ARSB	-0.0019198	0.0799898	0.240261
INPP5D	-0.00203718	0.0800597	0.240261
GP5	0.00126458	0.0802242	0.240485
PADI2	0.00192438	0.0803522	0.240485
BCL2L11	-0.00153547	0.0803817	0.240485
TP53BP1	0.00310922	0.0807153	0.241235
TTR	0.000877417	0.0809505	0.24169
CCN5	-0.00139731	0.0814458	0.24292
BRD2	-0.00118871	0.0817004	0.243404
APOL1	0.0021429	0.081775	0.243404
PRDX6	0.0021175	0.0818618	0.243414
FAM171A2	0.00555627	0.0820369	0.243686
PHLDB1	-0.00187162	0.0821669	0.243823
CD63	-0.00180146	0.0824294	0.244353
APEX1	-0.00207259	0.0825877	0.244574
IL34	0.001248	0.0827796	0.244893
EDNRB	0.00160488	0.0831748	0.245813
DNAJA1	-0.0016222	0.0837017	0.247119
LMOD1	-0.00121339	0.0839784	0.247685
CLSTN2	0.00131377	0.0841518	0.247946
TFAP2A	-0.00202816	0.084253	0.247993
ING1	-0.00158448	0.0843531	0.248037
HNRNPUL1	-0.0016848	0.0848643	0.249289
CLEC1A	-0.00112603	0.0850698	0.249641
GLRX	-0.00200902	0.085395	0.250343
SMAD5	-0.000693732	0.0859009	0.251573
SPINK8	0.00127445	0.0861051	0.251918
GBP1	-0.00228144	0.0865002	0.25258
MOCS2	-0.00229051	0.0865048	0.25258
SCRIB	-0.00316422	0.0866752	0.252824
BRSK2	0.00136043	0.0869759	0.253372
RAB44	-0.00149325	0.0870367	0.253372
ICAM2	-0.00107006	0.0877721	0.255257
HTR1B	-0.00150677	0.088473	0.257039
SCARF1	-0.00143266	0.0887733	0.257655
F11	0.00103592	0.0906952	0.262971
LTA	-0.00136374	0.0910296	0.263678
FUT1	0.00218706	0.0914813	0.264723
TXN	-0.00153323	0.0919143	0.265567
EPPK1	-0.00247443	0.0919552	0.265567
CEACAM16	0.00259145	0.0933599	0.269357
COL3A1	-0.000765495	0.0946425	0.272626
DNLZ	0.00315252	0.0947507	0.272626
SH2B3	0.00327179	0.0947737	0.272626
RNF168	0.00136925	0.0954792	0.274385
PNPT1	0.00393711	0.0960459	0.275742
CD244	0.000896174	0.096389	0.276054
AGBL2	0.00295047	0.0964139	0.276054
CXCL5	-0.00387205	0.0965036	0.276054
CDH4	-0.00160477	0.0967043	0.276054
FBLN2	-0.00104671	0.0967229	0.276054
PCDH1	-0.000718911	0.096723	0.276054
IL5	0.00476787	0.097069	0.27677
F7	-0.000987784	0.0975872	0.277976
ITGA2	0.00110974	0.0977427	0.278147
ZBTB16	0.00235612	0.0980191	0.278661
NGF	0.000398525	0.0981645	0.278802
TPMT	0.00246405	0.0983314	0.279005
MAN1A2	0.000815559	0.0990339	0.280725
DNPH1	-0.00176555	0.0992262	0.280761
KLRB1	-0.00124474	0.0992396	0.280761
CALCOCO1	0.00349936	0.0997071	0.281786
CCL13	-0.00226087	0.0999119	0.281786
OMG	0.00215207	0.0999384	0.281786
PLXNB3	0.0015323	0.0999885	0.281786
ENOPH1	0.00179769	0.100136	0.281928
CEMIP2	-0.00116389	0.10042	0.282457
MEP1B	0.00393892	0.100753	0.282807
ANXA2	-0.00237578	0.10088	0.282807
LIF	-0.0016697	0.100927	0.282807
NMI	-0.00233978	0.101001	0.282807
ENPP6	0.00127221	0.10103	0.282807
LILRA2	-0.00119294	0.101178	0.282828
GJA8	-0.00203774	0.101232	0.282828
GPIHBP1	-0.00228589	0.101808	0.283947
ATOX1	-0.00231912	0.101827	0.283947
NPL	-0.00149044	0.101926	0.28395
NINJ1	0.00179664	0.102137	0.284029
SERPINC1	0.000480827	0.102303	0.284029
ZHX2	-0.00107397	0.102336	0.284029
CASQ2	0.00164276	0.102344	0.284029
CA3	-0.00202532	0.102519	0.284245
SERPINA11	-0.00131727	0.102718	0.284526
ADAMTS16	-0.00101768	0.103048	0.284848
TSPAN7	0.00298154	0.103117	0.284848
ENPP2	-0.000893237	0.103128	0.284848
DBI	-0.00256608	0.103608	0.285903
IL32	-0.00135404	0.104193	0.287213
CSH1	-0.000914912	0.10428	0.287213
PGLYRP4	0.00205178	0.104455	0.287424
TAGLN3	-0.00202287	0.104756	0.287981
PPY	-0.00330414	0.104983	0.288063
SLIT2	0.00168339	0.105005	0.288063
ITGB6	0.000984066	0.105122	0.288063
PTPRS	0.00078176	0.105195	0.288063
PCDH12	0.000819311	0.10528	0.288063
MORC3	-0.000907684	0.105471	0.288313
VCAM1	-0.000875096	0.105708	0.288691
IL12RB1	-0.00124414	0.10603	0.289299
IL11	0.00206107	0.106294	0.289747
TCOF1	-0.000994712	0.107372	0.292166
IL22RA1	0.00137948	0.107435	0.292166
FGF5	-0.00105097	0.10752	0.292166
CASP4	-0.00546505	0.107582	0.292166
WASF1	0.00302084	0.107702	0.29222
CD209	0.00125426	0.107996	0.292571
USP47	0.00277075	0.108032	0.292571
CEP152	-0.0013578	0.108517	0.29361
GRPEL1	-0.00193969	0.108893	0.294354
IFNGR2	-0.00166179	0.109544	0.295839
PLB1	0.00192666	0.110078	0.297005
BAIAP2	-0.00202956	0.110599	0.297726
UBQLN3	-0.00144033	0.110613	0.297726
DDX39A	-0.00069971	0.110651	0.297726
GH2	-0.00546874	0.111078	0.298598
VSTM1	-0.00155086	0.111339	0.299023
GALNT5	0.000845872	0.111937	0.300342
CLGN	-0.00140671	0.112036	0.300342
VEGFC	-0.00176639	0.112452	0.301181
ART3	-0.00105936	0.112586	0.301264
CDH6	0.00119561	0.112716	0.301335
MENT	0.000692471	0.113777	0.303651
SAP18	0.00234923	0.113791	0.303651
P4HB	-0.00122623	0.114255	0.30461
TALDO1	-0.00142717	0.114456	0.304868
DGKA	-0.00171423	0.115864	0.308213
SLITRK1	-0.00106226	0.115923	0.308213
TGM2	0.00243446	0.116698	0.309756
ITGB1	0.000677537	0.116801	0.309756
CFI	-0.00067284	0.116856	0.309756
UXS1	-0.00169007	0.116929	0.309756
IDS	0.000266385	0.117045	0.309781
FAM3D	-0.00255344	0.11754	0.31081
HBEGF	-0.00227336	0.118252	0.312309
GORASP2	-0.00146209	0.118321	0.312309
TST	0.00235399	0.118434	0.312323
TOP1MT	-0.00159197	0.118726	0.312811
GGT1	-0.00155365	0.11898	0.313197
SSH3	-0.000907705	0.119895	0.315319
EXTL1	0.00145383	0.120822	0.317471
ERN1	-0.00118649	0.121251	0.318311
CHP1	0.00228919	0.121447	0.31854
LRPAP1	-0.00179033	0.121573	0.318581
TBC1D23	0.00282069	0.121722	0.318686
DEFB116	0.00239673	0.122623	0.320658
MVK	-0.0024311	0.122695	0.320658
SUOX	-0.00193335	0.123503	0.32248
KIR2DL2	-0.00268053	0.12364	0.322549
ITGAL	-0.00136453	0.123847	0.322799
DCN	0.000692808	0.123983	0.322866
TSHB	0.00266383	0.124249	0.32327
KYNU	-0.0013789	0.124565	0.323556
PTPRK	-0.000677758	0.124581	0.323556
FLT4	-0.00102854	0.125029	0.32443
FMR1	0.00106911	0.125564	0.325528
DARS1	0.00226976	0.125895	0.325951
PEBP1	-0.0018369	0.125951	0.325951
LCP1	-0.00145049	0.126076	0.325986
HS1BP3	-0.00271553	0.126637	0.327037
CTSE	-0.00154727	0.126721	0.327037
WFDC1	-0.00170682	0.126991	0.327037
MYCBP2	-0.00204506	0.126994	0.327037
GRP	-0.00165795	0.127044	0.327037
MCEMP1	-0.00281255	0.127691	0.328413
GZMA	-0.00108759	0.127804	0.328413
NUDT10	-0.000785075	0.128013	0.328661
AKAP12	0.000676784	0.128599	0.329602
CTSL	-0.000731301	0.128606	0.329602
FUOM	-0.00197718	0.129821	0.332425
TRAF2	0.00219219	0.130506	0.333884
B3GAT3	0.00062212	0.13081	0.33437
SPRING1	-0.00178954	0.131838	0.336701
ERBB4	0.000747477	0.132623	0.338409
ADD1	0.00217366	0.133272	0.339769
NELL1	0.00128395	0.133511	0.339862
IL1R2	-0.000568799	0.133594	0.339862
PDCD6	-0.00207582	0.133659	0.339862
ST6GAL1	-0.000858686	0.134052	0.340565
PNMA2	0.00129816	0.13469	0.341888
CPTP	-0.00120271	0.135209	0.342907
MYBPC2	-0.00246826	0.135758	0.343999
ATP6V1G2	-0.00301209	0.135904	0.344071
CD3G	0.00270575	0.136612	0.345561
ORM1	-0.000606687	0.137123	0.346553
VSTM2B	-0.00126624	0.137505	0.347218
EP300	-0.000903214	0.138058	0.348314
CA5A	-0.00278327	0.139248	0.350923
SV2A	0.00180411	0.139333	0.350923
IL22	-0.00196258	0.139466	0.350954
MYO9B	0.00198973	0.13975	0.351364
CKMT1A_CKMT1B	-0.00211412	0.140333	0.352525
GPA33	0.00407278	0.140962	0.35361
NLGN2	-0.0014355	0.141007	0.35361
CD40LG	-0.00225148	0.142213	0.356327
NEDD9	-0.00100482	0.142364	0.3564
PTH	-0.00234955	0.142683	0.356412
WAS	0.00199984	0.142704	0.356412
GPRC5C	-0.00164183	0.142737	0.356412
ATP5F1D	-0.00154177	0.142859	0.356412
CAMKK1	-0.00128939	0.143232	0.357039
BIRC2	0.0018503	0.143421	0.357205
CD3E	-0.00103853	0.143658	0.357489
CA7	0.00101733	0.143907	0.35764
DIPK1C	-0.00123262	0.143964	0.35764
TYMP	-0.00193417	0.144128	0.357741
CASP10	-0.00208073	0.144531	0.358438
IL17C	-0.002097	0.144734	0.358635
NPTX1	0.00114312	0.144935	0.358829
PVALB	0.00327546	0.145161	0.359084
GH1	0.00498728	0.145877	0.360546
CRTAM	-0.00146608	0.146417	0.361577
AMOT	-0.00113318	0.147266	0.363364
SCN2A	-0.0013992	0.149162	0.367638
TDP1	-0.0019897	0.149251	0.367638
CACNB1	-0.00173987	0.149545	0.367951
NEXN	0.00197469	0.14963	0.367951
NAMPT	-0.00155248	0.15067	0.370195
UBE2L6	-0.00176893	0.15089	0.370424
MPRIP	0.00126622	0.151074	0.370439
BAG4	-0.00142916	0.151223	0.370439
NEK7	-0.002138	0.151277	0.370439
MAP1LC3B2	0.001918	0.151501	0.370676
CD274	-0.000976857	0.151741	0.37095
TREML1	-0.00150686	0.152205	0.371773
MYOM3	0.00255456	0.15256	0.372329
JUN	-0.00145973	0.152698	0.372354
TOR1AIP1	-0.0015056	0.152911	0.372386
TGFBI	-0.000766451	0.152967	0.372386
NAAA	0.00165806	0.153346	0.372996
GIMAP7	0.000926794	0.153842	0.373892
SERPINA1	-0.000225544	0.154732	0.375741
SERPING1	-0.000510328	0.155369	0.376807
PTK7	-0.00106128	0.15543	0.376807
AKT3	0.00162261	0.155587	0.376875
GDNF	-0.00108441	0.155719	0.376881
SMAD1	0.00229631	0.158557	0.383406
BRME1	0.00120072	0.158678	0.383406
GADD45B	-0.00139391	0.160299	0.386607
LYPD1	0.0017929	0.16035	0.386607
PSPN	-0.0027862	0.160401	0.386607
AMPD3	0.00210134	0.160552	0.386651
ERBB2	-0.000677651	0.161519	0.38866
TMEM106A	-0.00192149	0.162164	0.38989
NEO1	-0.000625284	0.162704	0.390866
DMD	-0.00143315	0.163086	0.391459
CRTAC1	0.000800619	0.163503	0.392138
CHL1	-0.000864103	0.163669	0.392213
CD33	-0.00223192	0.163886	0.392411
ARNT	0.00105484	0.164522	0.393458
JAM3	-0.00140361	0.164593	0.393458
HADH	0.00181824	0.165023	0.394162
GOLGA3	-0.00218719	0.165675	0.394778
MGLL	0.00240598	0.165708	0.394778
RANBP2	-0.00092457	0.165723	0.394778
IL12RB2	0.00115044	0.165867	0.394778
KDM3A	0.00255975	0.165959	0.394778
MYL4	-0.00145033	0.166444	0.395431
FRMD4B	0.00197274	0.166505	0.395431
MYDGF	-0.00277345	0.167281	0.396627
GSTA3	-0.0022165	0.167331	0.396627
TRIAP1	-0.00174343	0.167619	0.396627
DAG1	-0.00129823	0.167654	0.396627
LEPR	0.000858376	0.167688	0.396627
PROK1	-0.00158279	0.168385	0.397952
MYL3	-0.00187922	0.168732	0.398447
SAA4	0.000823988	0.169158	0.399131
VWA5A	-0.00216286	0.169977	0.400445
RPL14	-0.00112832	0.170108	0.400445
CCDC28A	0.000798411	0.170127	0.400445
FGF9	-0.00114386	0.170474	0.400937
CPPED1	-0.0018348	0.171092	0.402067
NBN	-0.00143369	0.171538	0.40279
DCTN1	0.00182408	0.172454	0.404333
CX3CL1	-0.000921517	0.172473	0.404333
ASS1	0.00214397	0.172958	0.405145
ZNF75D	0.00168905	0.173312	0.405585
NAPRT	-0.000903818	0.173424	0.405585
CCN3	-0.000939351	0.17362	0.405716
GABARAPL1	-0.00182694	0.173834	0.405891
CLIP2	0.00307618	0.175049	0.408401
MYO6	-0.000983164	0.17556	0.409265
WWP2	0.00148906	0.176056	0.40989
SGSH	-0.00153139	0.176109	0.40989
AXL	0.000741105	0.177133	0.411943
PGR	0.00277256	0.17766	0.412668
TGFBR1	-0.000593351	0.177728	0.412668
FGR	-0.00159405	0.178189	0.413411
CTRL	-0.00180518	0.17848	0.413755
TP53I3	-0.0014535	0.178673	0.413874
CLIC5	-0.000831519	0.179345	0.415101
PHLDB2	-0.00253676	0.179866	0.415551
TPPP3	-0.00107228	0.179957	0.415551
LCAT	0.000610847	0.179968	0.415551
HDAC9	0.00170865	0.180181	0.415714
BAMBI	-0.000795222	0.180588	0.416324
CA13	0.00277123	0.182287	0.419907
OLFM4	-0.00323865	0.183589	0.422574
EDF1	-0.00185408	0.185606	0.426879
DDT	-0.00113588	0.186318	0.42818
ADAM22	0.000918951	0.186566	0.428194
BRD1	-0.000807404	0.186619	0.428194
SEZ6	-0.000813423	0.18678	0.428227
COMP	0.000888907	0.187206	0.428867
GLT8D2	-0.00125351	0.187896	0.429949
ADH1B	-0.00201026	0.187973	0.429949
PREB	-0.000798359	0.188504	0.430824
SOWAHA	-0.00133497	0.188777	0.431038
PDE4D	0.00162591	0.188894	0.431038
CD6	-0.00140592	0.189418	0.431897
SERPINE2	-0.00167903	0.189567	0.4319
SMAD3	0.00132638	0.189989	0.432153
SUGT1	0.00213714	0.190074	0.432153
PBK	-0.000800086	0.190124	0.432153
DHRS4L2	-0.00119602	0.190387	0.43218
BCAT1	-0.000805429	0.190432	0.43218
ABCA2	-0.000946821	0.190696	0.432443
C8B	0.000786287	0.191075	0.432964
PI16	-0.000648212	0.192908	0.436611
ENSA	-0.00134874	0.193016	0.436611
EPCAM	0.00263714	0.193134	0.436611
SCP2	0.0019814	0.193536	0.437168
RAD51	-0.00142028	0.19368	0.437168
RABGAP1L	-0.0016094	0.194284	0.437984
DEFB104A_DEFB104B	-0.00143426	0.19451	0.437984
DBH	0.00271486	0.194636	0.437984
CTRC	0.0016347	0.194643	0.437984
EIF2AK2	-0.00281693	0.196049	0.440808
NOTCH1	0.000398539	0.196354	0.441154
BLMH	0.000842363	0.196772	0.441751
CHIT1	-0.00390817	0.197799	0.443441
PRKD2	0.0012206	0.197829	0.443441
MMUT	0.00125334	0.198626	0.444885
RAB6B	0.00124192	0.199148	0.445713
GPC5	0.00140484	0.199891	0.44608
VNN1	-0.00187468	0.199944	0.44608
C1RL	-0.00051144	0.200073	0.44608
ZP3	-0.00681132	0.200153	0.44608
TSC22D1	-0.00171141	0.200153	0.44608
LGALS8	-0.00153084	0.200231	0.44608
NMT1	-0.00169829	0.200522	0.446303
GNPDA1	0.00082255	0.200637	0.446303
CEP350	-0.000977939	0.200808	0.446342
SERPINA12	-0.00279272	0.201422	0.447366
HGFAC	0.000734506	0.202101	0.448531
FLRT2	0.000711584	0.202544	0.449172
HK2	0.000721135	0.202709	0.449198
RNASEH2A	-0.00124646	0.203856	0.451112
NRP2	0.000719793	0.203883	0.451112
CSPG5	-0.00127708	0.204505	0.452146
BHMT2	0.000644394	0.20515	0.453228
PRKCQ	0.00112729	0.205676	0.454046
PTH1R	0.000972496	0.205851	0.454087
NXPE4	0.000910057	0.206309	0.454753
ITGB2	0.000726562	0.207113	0.456181
WASF3	0.00211731	0.207493	0.456672
FKBP1B	0.00278227	0.20854	0.458632
TRDMT1	-0.00215413	0.208987	0.459086
LAG3	0.00100624	0.209062	0.459086
NDST1	0.00163783	0.209491	0.459682
COPB2	0.00106548	0.210348	0.461215
PRKG1	0.00319052	0.210788	0.461831
ZCCHC8	-0.00150338	0.212368	0.464944
KITLG	0.000898045	0.21273	0.465386
DUOX2	0.0018059	0.213067	0.465774
CKB	-0.00163264	0.213424	0.466204
CDKN2D	0.00233156	0.214875	0.468793
TIGAR	-0.00117097	0.215009	0.468793
CD109	0.000809456	0.215212	0.468793
GFRAL	0.00156147	0.215252	0.468793
PSME2	-0.000940914	0.215757	0.469541
PER3	-0.00294891	0.216064	0.469704
CPQ	0.000878523	0.216154	0.469704
DAPP1	0.00294591	0.2176	0.471887
ITGAM	0.000782671	0.217651	0.471887
KIAA1549	0.00176071	0.217695	0.471887
PROCR	-0.000898577	0.217807	0.471887
MIA	-0.000898518	0.218169	0.472322
MCFD2	-0.00106036	0.218344	0.472349
AFP	0.00167927	0.218775	0.472613
NDUFA5	-0.000877984	0.218903	0.472613
ECSCR	0.0012658	0.218952	0.472613
S100A12	-0.00188312	0.219368	0.47316
CREB3	-0.0013844	0.220092	0.474369
IL3	-0.00145674	0.220348	0.47457
FMNL1	-0.00156127	0.221016	0.475658
CA2	-0.0017943	0.221727	0.476536
ACOX1	0.00120306	0.221852	0.476536
DUSP13	-0.00098523	0.221915	0.476536
PACS2	-0.00153171	0.222379	0.477101
TIMP2	0.000625231	0.222505	0.477101
ITGA6	0.0012738	0.224306	0.48061
HSD17B3	-0.00118945	0.225093	0.481941
MTR	-0.00159099	0.225504	0.482345
MME	-0.00202056	0.225613	0.482345
GBP4	0.0011819	0.22617	0.483181
CTNNA1	-0.00087639	0.229228	0.488935
SOD1	-0.00120236	0.229396	0.488935
CD164L2	-0.000871167	0.22947	0.488935
CES3	-0.00168326	0.229655	0.488935
BCL7B	-0.00108337	0.229702	0.488935
ATF4	-0.000829045	0.230296	0.489841
F13B	0.000605555	0.230856	0.490472
IGFBP2	-0.00163934	0.230929	0.490472
TDO2	0.000911759	0.232164	0.492268
HBQ1	0.00146855	0.232181	0.492268
DCTN2	0.00225024	0.232282	0.492268
CD160	-0.00111688	0.232573	0.492528
PKD2	-0.00141058	0.233061	0.493203
STAM	0.000895303	0.234398	0.495672
CRTAP	-0.00117656	0.235375	0.497377
CYTH3	-0.00173276	0.236254	0.498873
AIF1	-0.00124905	0.236904	0.499608
NPY	-0.00153151	0.23702	0.499608
ANXA11	0.00159103	0.237117	0.499608
CPB2	0.000521106	0.237366	0.499772
DIABLO	0.0026028	0.238645	0.502102
PECR	-0.000683502	0.240766	0.5062
AIDA	-0.00197812	0.241341	0.507042
PTTG1	-0.000975052	0.241608	0.50722
AOC3	0.000704862	0.241774	0.50722
RBM25	-0.00107139	0.242404	0.507736
ACY1	-0.00144462	0.242536	0.507736
NAGPA	0.000493517	0.242542	0.507736
VAT1	-0.000461888	0.243248	0.50865
PTS	-0.0013361	0.243328	0.50865
COX6B1	0.000760617	0.243934	0.509551
IFNL2	-0.00148375	0.244466	0.510122
LYPD3	0.000781376	0.244625	0.510122
CSF3	-0.00114234	0.244733	0.510122
APOB	0.000515886	0.245099	0.510522
SERPINB5	-0.00113792	0.2455	0.51064
PFDN2	0.00130306	0.245507	0.51064
SOD3	0.00134502	0.245895	0.511083
GGA1	0.00156262	0.247475	0.514
DSCAM	0.000812125	0.248056	0.51484
TMED1	-0.00127209	0.248794	0.515769
MEGF11	0.000775433	0.248858	0.515769
IL33	0.000897465	0.250093	0.517961
GCG	-0.0029252	0.251223	0.519897
CPXM2	-0.000591285	0.251385	0.519897
RPS10	0.000954365	0.25187	0.520079
TSPAN1	0.000616888	0.252033	0.520079
TP53	-0.000984734	0.2521	0.520079
MTDH	-0.00210631	0.252353	0.520079
FCRL5	0.00130444	0.252365	0.520079
MAX	-0.00239321	0.252949	0.520135
CELA2A	-0.00133255	0.253542	0.520135
NUDT5	-0.00118499	0.253569	0.520135
ARMCX2	0.00147671	0.253635	0.520135
LTBP2	-0.000729875	0.253732	0.520135
VEGFD	0.000784306	0.253952	0.520135
DCDC2C	-0.00149581	0.253965	0.520135
NFYA	-0.000880636	0.254049	0.520135
NFKBIE	-0.00114176	0.254074	0.520135
YJU2	0.000746891	0.254177	0.520135
TFRC	-0.000842663	0.255303	0.521866
TINAGL1	0.000495712	0.255381	0.521866
ADGRE5	0.000678306	0.256412	0.522789
MYH4	0.00105427	0.256578	0.522789
DEFB103A_DEFB103B	-0.000933748	0.256641	0.522789
IL13RA2	-0.000647565	0.256646	0.522789
PRKRA	0.00152931	0.25673	0.522789
EDEM2	-0.000847511	0.257038	0.522979
PAK4	-0.00137239	0.257182	0.522979
VSNL1	-0.000843482	0.25749	0.52324
NUMB	-0.00189608	0.258615	0.525159
LAMB1	-0.000660646	0.25937	0.526325
HRC	0.000813387	0.259901	0.527037
CCAR2	-0.00125021	0.26026	0.527398
AMBN	0.000631579	0.260617	0.527581
CDA	0.00107278	0.260787	0.527581
IGHMBP2	-0.00126262	0.260954	0.527581
SPRR1B	-0.00188305	0.261088	0.527581
CDC26	-0.00157768	0.261256	0.527581
RAB2B	0.00136487	0.262637	0.530004
TRIM5	0.00191051	0.263491	0.531358
SH3BP1	-0.00107341	0.264641	0.53319
CD164	-0.00057852	0.264765	0.53319
BDNF	-0.00184499	0.265321	0.53394
MNAT1	-0.000961365	0.266046	0.53503
BOLA2_BOLA2B	-0.00125698	0.26649	0.535553
VSIR	-0.0013605	0.267159	0.536166
ABO	0.00322213	0.267163	0.536166
CIT	-0.00102739	0.269031	0.539543
HSBP1	-0.00208222	0.269266	0.539643
GPNMB	-0.000612514	0.269738	0.540217
MAVS	0.00207518	0.270364	0.541099
PPP1R14A	-0.00171224	0.270761	0.541521
PAGR1	-0.000979198	0.272309	0.543899
FZD8	-0.000943084	0.272423	0.543899
PRUNE2	-0.000658836	0.27251	0.543899
RPE	-0.00154954	0.27275	0.544006
SERPINA3	-0.000321538	0.273234	0.544097
TJAP1	0.00184053	0.273251	0.544097
CLINT1	-0.000997973	0.273356	0.544097
RGMA	-0.00067906	0.274779	0.546558
CFC1	-0.00098283	0.275355	0.547329
FIS1	-0.00168423	0.275681	0.547603
IKZF2	0.00198159	0.27658	0.549016
CLEC1B	-0.00209827	0.27703	0.549329
FOLH1	0.00231294	0.277296	0.549329
MANEAL	-0.00109525	0.27739	0.549329
TACC3	0.00253682	0.277492	0.549329
PDIA3	-0.000548753	0.277997	0.549955
ENTPD6	-0.000594063	0.278673	0.550918
ADH4	-0.0019072	0.279	0.55119
XRCC4	-0.000812559	0.279238	0.551286
PKLR	-0.00148546	0.280415	0.553236
TMEM25	0.000954632	0.281229	0.554466
IL7	0.001378	0.28168	0.55498
SCN3A	0.0007934	0.281945	0.555068
TNFAIP8	-0.000801429	0.28228	0.555068
SETMAR	0.000649092	0.282368	0.555068
TCL1A	-0.00203899	0.282487	0.555068
IFNAR1	-0.000545105	0.284036	0.557222
SELP	-0.00122423	0.284053	0.557222
CD101	0.00090531	0.284157	0.557222
ANKRA2	-0.00122275	0.284809	0.557926
GAS2	-0.00108896	0.285054	0.557926
DOCK9	0.00258786	0.28509	0.557926
SIGLEC6	-0.000705482	0.285568	0.558428
AHNAK2	-0.00060212	0.28573	0.558428
PMS1	-0.00107155	0.286639	0.559148
PSCA	-0.00558404	0.286663	0.559148
DKK1	-0.0012579	0.286843	0.559148
GNGT1	0.00113751	0.286881	0.559148
PDLIM7	0.00271015	0.287057	0.559148
SAT2	-0.00142628	0.287747	0.559605
FCER2	-0.00106774	0.287825	0.559605
DCTPP1	-0.000666798	0.287868	0.559605
LYZL2	-0.00074591	0.288395	0.560203
GPR101	-0.00130531	0.288926	0.560203
TXNDC5	-0.00143002	0.288983	0.560203
CALY	0.000801792	0.289184	0.560203
C7ORF50	-0.000491331	0.289278	0.560203
CDC123	-0.00138746	0.289339	0.560203
SRC	0.00255809	0.289521	0.560203
MEGF10	0.000785999	0.289881	0.560526
BEX3	-0.000998203	0.29031	0.560682
ILKAP	-0.00122431	0.290347	0.560682
CASP1	-0.00145169	0.290923	0.561236
HSP90B1	0.00139714	0.291058	0.561236
APPL2	0.00238871	0.29126	0.561236
FEN1	-0.00136342	0.291404	0.561236
CDKL5	-0.00115773	0.291991	0.561997
VIPR1	0.000529732	0.293278	0.5641
C1QTNF1	0.000885823	0.294069	0.564989
PPP1R9B	0.00201714	0.294128	0.564989
ALDH2	0.00108652	0.295619	0.567479
EPN1	-0.000911147	0.295924	0.567691
OGFR	-0.000693731	0.296708	0.56882
TLR1	0.000553271	0.297223	0.569433
CLEC4C	0.000951718	0.297775	0.570095
LRRFIP1	-0.00100868	0.29796	0.570095
AMOTL2	-0.00100205	0.298616	0.570966
PCBP2	-0.00149046	0.298964	0.570966
CASP3	0.00182551	0.299327	0.570966
MAGED1	0.00101149	0.299378	0.570966
CRYGD	-0.00199784	0.299727	0.570966
LPA	0.00363519	0.299908	0.570966
DPP10	-0.000716194	0.29992	0.570966
DPEP1	0.00107191	0.299983	0.570966
KIF22	-0.0025287	0.301113	0.572456
NPHS2	0.00218589	0.301158	0.572456
CFB	-0.000698711	0.301356	0.572458
SESTD1	0.00134127	0.301556	0.572466
ITIH5	-0.000920696	0.302318	0.573538
DYNC1H1	-0.000950703	0.303772	0.575921
SLC27A4	-0.00135567	0.304671	0.577251
DRAXIN	-0.000886718	0.305335	0.577875
CETN2	-0.00137314	0.305397	0.577875
GZMB	0.00128799	0.306638	0.579846
MEGF9	-0.000404874	0.307197	0.580527
SIL1	-0.000650391	0.308601	0.582802
LY75	0.000770908	0.310287	0.585606
USP8	0.00197079	0.31195	0.587835
ZNRD2	-0.00141723	0.312145	0.587835
DNAJA2	0.00167447	0.312182	0.587835
ARHGAP25	0.00117936	0.312275	0.587835
ERC2	-0.00153477	0.312637	0.588137
PSRC1	0.00118298	0.313049	0.588533
KHK	-0.00129954	0.313903	0.589757
SARG	-0.00219203	0.314437	0.589885
VWF	-0.00145111	0.314575	0.589885
HNF1A	-0.00141611	0.314578	0.589885
MAP3K5	0.00202193	0.314884	0.590079
GRIN2B	-0.00115961	0.31612	0.592015
FGF20	-0.000888242	0.316822	0.592804
TPSD1	-0.000742856	0.31695	0.592804
SEPTIN3	-0.00146137	0.317152	0.592804
GRIK2	0.000833224	0.319706	0.597072
RPGR	0.000823981	0.319846	0.597072
RALY	-0.000966663	0.320251	0.59713
ENTPD5	-0.000409183	0.320286	0.59713
IRAG2	0.00178801	0.320587	0.597309
MCTS1	0.00051094	0.321319	0.59826
BTNL10	0.000822271	0.321508	0.59826
PSMC3	-0.000607861	0.322247	0.599252
CCDC50	-0.00153041	0.323836	0.601665
GIMAP8	-0.00102099	0.323957	0.601665
CINP	0.000887223	0.324265	0.601852
F2R	-0.00111996	0.324491	0.601888
RARRES1	-0.000672186	0.32477	0.602023
DFFA	-0.00133885	0.325412	0.602514
MAP2K1	-0.00126473	0.325643	0.602514
ZP4	-0.000680533	0.325655	0.602514
APCS	-0.000761119	0.325953	0.602683
HAGH	-0.00149085	0.326443	0.603206
PCYT2	-0.001499	0.327083	0.603873
NECAP2	-0.0013369	0.327218	0.603873
CSF2RB	0.000856892	0.327982	0.604651
AFM	-0.000385628	0.328196	0.604651
TADA3	0.000760379	0.328292	0.604651
TNFAIP2	-0.000899339	0.329262	0.604651
ARHGEF5	-0.00143783	0.329632	0.604651
SMPD3	0.00113231	0.329681	0.604651
PRELP	0.000457408	0.329734	0.604651
VAV3	0.00195891	0.329974	0.604651
TNNI3	-0.00164263	0.329984	0.604651
TEK	-0.000412546	0.330058	0.604651
HMOX1	0.000903764	0.330114	0.604651
CAPS	-0.00188144	0.33013	0.604651
ID4	0.000853303	0.331059	0.605949
MRPL24	-0.000738132	0.331419	0.605949
DECR1	0.00186248	0.331463	0.605949
BCL7A	-0.00123234	0.333245	0.608825
DLL4	-0.00163035	0.333484	0.60888
DSG2	0.000519891	0.335098	0.611443
VSIG10	-0.000664722	0.336525	0.613663
PTEN	0.000581743	0.336834	0.613842
IGF1R	-0.000422425	0.337777	0.615176
FABP9	0.00107302	0.339374	0.617047
LAT2	0.00237244	0.339414	0.617047
NRCAM	0.000534897	0.339482	0.617047
RRP15	0.00175054	0.339651	0.617047
FHIP2A	0.000937392	0.340491	0.618188
PRSS53	0.000694964	0.340795	0.618354
CD82	-0.000790018	0.3414	0.619065
NGFR	-0.000548232	0.34275	0.621127
IL17RA	0.000827338	0.343264	0.621349
C2ORF69	-0.00111642	0.343434	0.621349
IL2RB	0.00074512	0.343512	0.621349
HS6ST1	-0.000628282	0.343862	0.621597
PSMG4	-0.00112276	0.345285	0.623573
PCNA	-0.00122982	0.345383	0.623573
PLPBP	0.00129081	0.346113	0.624504
TPSG1	-0.000518947	0.347749	0.627068
HTR1A	0.00147998	0.349062	0.628867
SELPLG	0.00049881	0.349179	0.628867
PAIP2B	-0.000970161	0.349479	0.629018
SERPINA6	0.00030123	0.349795	0.629199
CSDE1	0.00222413	0.351461	0.631806
NOS2	0.000735944	0.351887	0.631984
BIN2	0.00171886	0.351994	0.631984
OMP	0.000937553	0.352479	0.632076
TNFSF12	0.000522062	0.352643	0.632076
CPA1	-0.00105556	0.352696	0.632076
SPACA5_SPACA5B	-0.000523287	0.353149	0.6325
DUSP3	0.00162491	0.354642	0.634413
KIAA1549L	-0.000532771	0.354653	0.634413
LILRA6	-0.00134828	0.355384	0.635331
UPB1	-0.00174059	0.356167	0.636314
PPM1A	0.000580286	0.356371	0.636314
DNAJB8	0.00108717	0.356674	0.636465
ELAVL4	-0.00159628	0.358483	0.639302
SPAG1	-0.00104514	0.358712	0.63932
NTF4	0.000707599	0.359876	0.641001
PLEKHO1	-0.00127741	0.360312	0.641385
ANGPTL3	-0.000651709	0.360767	0.64179
TF	-0.000386671	0.361068	0.64179
DCLRE1C	0.000573895	0.3612	0.64179
GRAP2	0.00232333	0.361815	0.64221
SPINK5	0.000575158	0.361877	0.64221
BACH1	-0.00132416	0.362767	0.642676
PSMG3	-0.000968834	0.362768	0.642676
KCNIP4	0.000920404	0.362801	0.642676
PRTFDC1	0.0020314	0.36493	0.645312
LMNB1	-0.00109081	0.365089	0.645312
LRRC37A2	-0.000761259	0.365124	0.645312
TDGF1	0.00262191	0.365175	0.645312
DLGAP5	0.000962613	0.365879	0.646164
C19ORF12	-0.00114877	0.366143	0.64617
CERT	0.00110905	0.366368	0.64617
ITGB5	0.000667028	0.366547	0.64617
FOLR3	-0.00331287	0.368737	0.648698
PPL	-0.000607283	0.368742	0.648698
TOMM20	-0.00141178	0.369002	0.648698
COL4A4	-0.000934349	0.369019	0.648698
DSG4	0.000931718	0.369095	0.648698
PXDNL	0.00100779	0.369485	0.648993
ECHDC3	0.00133266	0.371928	0.652599
ERMAP	-0.000813176	0.371986	0.652599
TSPYL1	-0.000729958	0.372652	0.652863
RAC3	0.00126522	0.372846	0.652863
CRNN	0.0011956	0.372929	0.652863
SAT1	-0.000897382	0.373033	0.652863
CYB5R2	-0.000987167	0.373664	0.653022
EPGN	-0.000835584	0.373716	0.653022
MED18	0.00136381	0.373796	0.653022
CDC25A	-0.000722199	0.374893	0.654547
CDK1	-0.000654183	0.375344	0.654647
CPA2	0.00113452	0.3754	0.654647
NFKB1	-0.00131443	0.375741	0.65485
ANK2	0.00131455	0.376376	0.655565
JMJD1C	0.00100611	0.376735	0.655799
SERPINI1	0.000542562	0.377138	0.656107
CETN3	-0.00134021	0.377863	0.656977
SMPDL3A	-0.00112828	0.378633	0.657667
ATF2	-0.00118837	0.378747	0.657667
PNLIP	0.00106101	0.378937	0.657667
DDX25	-0.000693477	0.379221	0.657767
CEP85	0.0011347	0.379925	0.658291
NRTN	-0.000901091	0.380584	0.658291
XPNPEP2	0.00150662	0.380682	0.658291
KYAT1	0.00100299	0.380732	0.658291
SKIV2L	0.000703413	0.380851	0.658291
MAMDC4	-0.000934245	0.380878	0.658291
PZP	0.00104531	0.381428	0.65885
CTSC	-0.000739908	0.381852	0.659192
IVD	-0.000851067	0.38231	0.659593
CEP112	-0.000779703	0.382801	0.660049
CRYBB1	-0.00112415	0.383304	0.660525
PLXNB2	-0.000406205	0.383989	0.660988
CCND2	-0.00064458	0.384186	0.660988
TRAF3	0.000652054	0.384522	0.660988
GLOD4	-0.000635093	0.384552	0.660988
RBM17	-0.00133099	0.384707	0.660988
AHSA1	-0.00116909	0.385393	0.661777
SLC1A4	0.000896029	0.385821	0.661884
SATB1	-0.00052644	0.38591	0.661884
ENG	-0.000296375	0.386535	0.662548
COMMD9	0.000677414	0.386752	0.662548
PADI4	-0.00126712	0.387351	0.662926
NGRN	-0.000380496	0.387427	0.662926
GAGE2A	-0.00110434	0.388416	0.664227
ITGB7	0.000777669	0.388956	0.664761
RAB11FIP3	0.0018711	0.389431	0.665183
HEPH	0.000431162	0.39031	0.666293
DYNLT1	-0.00140776	0.390758	0.666668
ART5	-0.00110582	0.391532	0.667355
AMIGO2	0.000382996	0.391619	0.667355
PDXDC1	-0.00102675	0.392294	0.668115
MRPS16	-0.000500239	0.393392	0.669594
CLASP1	0.00122006	0.39472	0.669886
LIFR	-0.000400733	0.394748	0.669886
CBLN1	0.00166709	0.394826	0.669886
CEP43	0.00117939	0.394967	0.669886
RASA1	-0.000559572	0.395103	0.669886
FRMD7	-0.000556965	0.395137	0.669886
GFER	-0.00110286	0.395173	0.669886
PNLIPRP1	-0.00129065	0.395638	0.670284
HSPA1A	-0.00122841	0.396276	0.67091
IDO1	0.0010988	0.396467	0.67091
TYRO3	-0.000474242	0.39782	0.672702
STX4	-0.00101602	0.397988	0.672702
LRP2	-0.000614179	0.399057	0.674116
PTGES2	-0.000922475	0.399875	0.674718
ESR1	0.000968704	0.399915	0.674718
IRAK1	0.00116908	0.400107	0.674718
STC2	0.000424838	0.400976	0.675792
DGCR6	-0.000738814	0.40168	0.676587
IGFL4	-0.00126255	0.402133	0.676917
MUCL3	0.000742425	0.40269	0.676917
EIF1AX	-0.000920138	0.402701	0.676917
IL1B	-0.000949062	0.402805	0.676917
CR1	0.000602295	0.403353	0.677447
KLRD1	-0.000772079	0.403849	0.67789
CLEC2L	-0.000854868	0.404216	0.678115
CD40	-0.000822295	0.406746	0.681671
EBAG9	0.00157955	0.406804	0.681671
PFDN6	0.00108965	0.407326	0.682154
MMP15	0.0008164	0.408344	0.682904
LYSMD3	-0.00171352	0.408354	0.682904
PDP1	0.000821086	0.408477	0.682904
HTRA2	0.00102188	0.408756	0.682979
PDGFC	-0.000477098	0.409077	0.683124
EVI2B	-0.000676712	0.410623	0.685185
C1QBP	0.00114407	0.410916	0.685185
TXNRD1	-0.000761744	0.411017	0.685185
KLK7	0.000631752	0.411586	0.685741
VIM	-0.00191977	0.412077	0.686166
FKBP5	-0.00156086	0.412428	0.68636
CNTNAP2	0.000654119	0.412717	0.686448
PGD	-0.000895371	0.413196	0.686852
NPTX2	-0.000516637	0.413772	0.687418
PLG	0.000361955	0.414358	0.688
ARHGEF1	-0.00146969	0.414919	0.688437
PARK7	-0.000881121	0.415094	0.688437
SHC1	0.00188689	0.415755	0.688485
SEMA4D	-0.000488253	0.415907	0.688485
IL31RA	0.000660244	0.41593	0.688485
FOXO3	0.00155541	0.416073	0.688485
APOBR	-0.000679685	0.416304	0.688485
QDPR	-0.000711459	0.416947	0.689157
SLC12A2	0.000452073	0.417942	0.689269
ITIH4	-0.000432109	0.418015	0.689269
FGF6	-0.000705294	0.418278	0.689269
PSMD9	-0.000930697	0.418374	0.689269
NMNAT1	-0.00119625	0.418494	0.689269
AMIGO1	0.0008187	0.418535	0.689269
MYH7B	-0.00071081	0.419008	0.689269
GABARAP	-0.000789591	0.419136	0.689269
BCAT2	0.000876091	0.419144	0.689269
FN1	0.00042801	0.419563	0.689569
PCDH7	0.000549344	0.420324	0.690431
NFX1	0.0011006	0.420843	0.690893
CNGB3	0.000883921	0.421518	0.691198
IL2RG	-0.000609136	0.421584	0.691198
CD84	0.000493879	0.42174	0.691198
CHM	-0.000967788	0.422285	0.691702
ST13	0.000930741	0.42358	0.693434
ENO2	0.00104551	0.425093	0.695519
POMC	0.00106241	0.425372	0.695586
EIF2AK3	0.00107047	0.426039	0.696286
OGT	-0.00099385	0.426908	0.697315
CA1	-0.00102281	0.427298	0.697562
SLC28A1	-0.00094397	0.429129	0.700157
THRAP3	-0.00183982	0.429384	0.700181
IL17A	-0.000703508	0.430454	0.701002
ADCYAP1R1	0.00056124	0.430501	0.701002
ADRA2A	0.00116252	0.430609	0.701002
TNN	0.000689858	0.432879	0.704304
PSMD5	0.000888251	0.433839	0.705324
APOA4	-0.00054914	0.434144	0.705324
KDR	-0.000386999	0.434334	0.705324
S100A4	0.0008946	0.434639	0.705324
HRG	0.000482638	0.434716	0.705324
ALMS1	-0.000671766	0.435039	0.705455
VTCN1	0.000492886	0.436968	0.708164
GIPC3	0.00152684	0.437195	0.708164
TRIM40	0.00111366	0.437866	0.708856
VIT	-0.000571235	0.438885	0.709555
KLRK1	-0.000715118	0.439355	0.709555
KIR2DS4	0.00266722	0.439425	0.709555
PPCDC	-0.000740946	0.439545	0.709555
ACADM	0.00111046	0.439653	0.709555
LPO	-0.000925089	0.439759	0.709555
AMN	0.00073579	0.440105	0.70972
TCTN3	-0.000448909	0.440495	0.709948
CD2AP	-0.0010278	0.440733	0.709948
PTPN1	0.0012247	0.441492	0.710777
KIR3DL1	-0.00190896	0.442279	0.711385
ARL2BP	0.000632954	0.442357	0.711385
CYP24A1	0.00134646	0.442888	0.711845
CSF2	0.00054317	0.443709	0.712087
RNF5	0.00111566	0.443735	0.712087
IFT20	-0.000663043	0.443957	0.712087
TCL1B	-0.00125159	0.444335	0.712087
TTF2	-0.000742152	0.445272	0.712087
PDZD2	0.000929396	0.445455	0.712087
NOTCH2	0.000313965	0.445534	0.712087
CHMP1A	0.00120014	0.445626	0.712087
SMS	0.000987503	0.445812	0.712087
PYDC1	-0.000649884	0.445863	0.712087
TNFRSF13C	0.000637198	0.446114	0.712087
PKN3	-0.00114603	0.446165	0.712087
NAP1L4	-0.000643978	0.446215	0.712087
CD34	0.000362929	0.446714	0.712493
GBP2	0.000892862	0.447151	0.712568
BST1	-0.000719925	0.44725	0.712568
C2CD2L	0.000660019	0.447836	0.712942
FTCD	-0.0013272	0.44808	0.712942
CD177	-0.00193814	0.448219	0.712942
PGA4	-0.0010746	0.449006	0.713804
GLI2	0.000503967	0.450188	0.715294
TBC1D17	-0.000716647	0.450434	0.715295
AMY2A	0.000741176	0.451248	0.716087
PTRHD1	0.000918574	0.451433	0.716087
MBL2	0.00158562	0.451763	0.716087
MAPRE3	0.00219849	0.451916	0.716087
ACTA2	-0.000669564	0.452277	0.716142
ADGRE2	0.000418756	0.452574	0.716142
CASP9	0.000953155	0.452688	0.716142
RBKS	-0.000779527	0.454512	0.718638
MSTN	0.00075512	0.455915	0.719952
GLRX5	-0.00132511	0.456293	0.719952
FOSB	-0.00057111	0.456587	0.719952
MAMDC2	0.000515789	0.456645	0.719952
TBR1	-0.000704043	0.456658	0.719952
TIA1	0.00179636	0.456826	0.719952
NDRG1	0.00102305	0.457434	0.719986
GPI	-0.00070337	0.457444	0.719986
SUSD5	0.000514154	0.457589	0.719986
CACNB3	-0.00124425	0.459258	0.722222
POLR2A	-0.000440981	0.460685	0.724076
UNG	0.00049784	0.461572	0.725079
GUK1	0.000571884	0.462481	0.726115
KCNC4	0.000834222	0.463099	0.726693
ROR1	-0.000459277	0.464238	0.727308
SOX2	0.000340703	0.464403	0.727308
EGF	-0.001508	0.464504	0.727308
IL6ST	-0.000250208	0.464832	0.727308
CA8	-0.000403683	0.464909	0.727308
YES1	0.00167772	0.464988	0.727308
SHH	-0.00063695	0.465311	0.727423
DNAJC9	-0.0011426	0.465766	0.727743
WFDC12	-0.000955886	0.466105	0.727883
HMGCS1	-0.000633066	0.467071	0.729001
CD22	-0.000604327	0.467888	0.729011
REST	-0.000512898	0.467963	0.729011
METAP1D	0.00118988	0.467966	0.729011
PTPRM	0.00035132	0.468078	0.729011
SHMT1	0.00125813	0.469141	0.730276
CPA4	-0.000628526	0.469407	0.7303
ANGPTL2	-0.00059733	0.470168	0.731094
HGS	0.0011272	0.471636	0.732061
CPOX	-0.000402682	0.471643	0.732061
REPS1	-0.000560577	0.47223	0.732061
NENF	-0.00160608	0.472316	0.732061
NUDT16	-0.00125153	0.472527	0.732061
IL10	-0.00123617	0.472727	0.732061
QSOX1	0.000615149	0.472842	0.732061
FCER1A	-0.000342533	0.472847	0.732061
USO1	0.00131542	0.473077	0.732061
CRLF1	0.000363888	0.473334	0.732061
MLLT1	-0.000996062	0.473554	0.732061
PRKAG3	-0.000456051	0.474554	0.733219
STK11	0.00105572	0.475138	0.733732
TAB2	0.00153539	0.475485	0.733879
FABP6	-0.000802752	0.475967	0.734234
FAM172A	0.000875797	0.476848	0.735204
CXCL1	-0.00139615	0.477429	0.73571
MITD1	0.00137907	0.47939	0.738342
CEACAM18	-0.000963502	0.479921	0.738707
UROS	0.000978662	0.480628	0.738707
DDHD2	0.00093587	0.480791	0.738707
ITGAX	0.000756513	0.480925	0.738707
CCN4	-0.000578208	0.481094	0.738707
SMC3	0.000802344	0.481148	0.738707
IZUMO1	0.000675907	0.481757	0.738997
LARP1	-0.000890273	0.481941	0.738997
GIGYF2	-0.00107977	0.482098	0.738997
LDLR	0.000750128	0.482642	0.739029
VCPKMT	0.00122086	0.482686	0.739029
BLOC1S2	-0.00102927	0.482879	0.739029
GSAP	0.00121039	0.483975	0.739833
COL4A1	0.000568636	0.483982	0.739833
PRC1	-0.000614191	0.484167	0.739833
PDIA5	0.000834411	0.485276	0.74114
HSD17B14	0.000854504	0.485831	0.741599
CD300LG	-0.000519686	0.487108	0.742942
IL5RA	0.000755535	0.487458	0.742942
ERBB3	-0.000254032	0.487698	0.742942
COMMD1	-0.000856971	0.487731	0.742942
OTUD6B	-0.00082007	0.488406	0.743581
CLTA	-0.000665869	0.488852	0.743872
AFAP1	0.00115734	0.48915	0.743938
LPL	0.000629942	0.490014	0.744862
AK1	-0.000906447	0.490782	0.745332
EXOSC10	-0.000841508	0.490835	0.745332
LAMA1	0.000764018	0.491523	0.74553
NAGA	0.000810836	0.491534	0.74553
FLT3	0.000427838	0.491732	0.74553
MORF4L2	-0.000514848	0.493739	0.747975
PPIF	0.000859267	0.493859	0.747975
FAM171B	-0.000378557	0.494369	0.74836
SMTN	0.0013221	0.494839	0.748437
MPHOSPH8	0.00102663	0.495128	0.748437
ICAM3	-0.000344565	0.495191	0.748437
CUZD1	-0.000508341	0.495471	0.748472
SNX5	-0.000411344	0.497456	0.750343
LATS1	-0.00114438	0.497682	0.750343
GP1BA	0.000437482	0.498086	0.750343
INPPL1	-0.00133575	0.498263	0.750343
RP2	0.000569082	0.498336	0.750343
AP3B1	-0.00104567	0.4986	0.750343
ARTN	-0.00061323	0.498603	0.750343
C9	-0.000657712	0.49881	0.750343
TEF	-0.000571895	0.499034	0.750343
BTN1A1	0.000529159	0.499284	0.750343
MED21	-0.000674808	0.500337	0.751537
IL17D	-0.000441546	0.500914	0.752016
ADA	-0.000457808	0.501717	0.752834
SOX9	-0.000358085	0.50284	0.753884
AMY2B	0.000673609	0.502935	0.753884
ADAMTS1	-0.000423655	0.503863	0.754888
LYN	0.00113052	0.504519	0.755218
TIMP3	-0.00176667	0.504602	0.755218
MINDY1	0.00145059	0.505664	0.756311
CEBPB	-0.00051526	0.506038	0.756311
UBAC1	-0.000484248	0.506212	0.756311
LONP1	-0.00115731	0.50637	0.756311
KIAA2013	0.000749838	0.50672	0.756445
SERPINB9	0.000446921	0.507365	0.756787
UBE2B	-0.000385245	0.507468	0.756787
FRZB	0.000340224	0.507821	0.756927
FCN2	0.000534791	0.508603	0.757295
ADGRB3	0.000442796	0.508816	0.757295
CIAPIN1	-0.000848943	0.509007	0.757295
CPB1	-0.000740344	0.509108	0.757295
BAX	-0.00116499	0.509676	0.757753
C3	-0.000632108	0.5106	0.75874
PGLYRP2	-0.000401808	0.510968	0.758899
ATXN2L	-0.00062435	0.512042	0.759793
PDIA2	0.000530438	0.512091	0.759793
ZNF830	0.00103414	0.512602	0.760164
PTN	-0.000641992	0.513288	0.760794
SLC16A1	-0.000781701	0.514188	0.76174
IDI2	-0.000603476	0.515028	0.762462
LRRC38	-0.000647504	0.515198	0.762462
APRT	0.000633291	0.516058	0.763144
GYS1	0.00121632	0.516183	0.763144
LDLRAP1	-0.0012468	0.516874	0.763779
MAP2K6	0.00129644	0.519344	0.766673
GOT1	-0.000518736	0.519395	0.766673
MRPL46	0.000360034	0.519709	0.766673
SUMF1	-0.000847455	0.519885	0.766673
CASP8	0.000800541	0.52099	0.767914
FCRL1	0.000581107	0.522034	0.768667
SLC51B	0.00101608	0.522209	0.768667
GAD2	0.000621226	0.522328	0.768667
IL17RB	0.000683916	0.522557	0.768667
GCLM	-0.000614113	0.52304	0.768991
GLYR1	-0.000764185	0.524054	0.769803
TBC1D5	0.00102672	0.524348	0.769803
PRDX2	0.000829402	0.524677	0.769803
PAFAH2	-0.000617365	0.524737	0.769803
ACRBP	0.000495998	0.524914	0.769803
DPEP2	-0.000355	0.525312	0.77
IL6R	-0.000431194	0.526755	0.771248
NFAT5	0.00112078	0.526821	0.771248
BABAM1	0.00035901	0.527222	0.771248
JPT2	-0.00109835	0.527222	0.771248
ROBO4	-0.000219773	0.528645	0.772941
MECR	-0.00115629	0.529488	0.773489
ZFYVE19	-0.00113393	0.52955	0.773489
TMPRSS11D	0.000489541	0.530183	0.773727
GC	0.000325135	0.530245	0.773727
BRD3	-0.000614717	0.531311	0.774317
[truncated: 916 more rows]

## Sheet: S7. UKB organ ages
Table S7. Results of linear models testing associations of age at menopause with organ age gaps in UKB, adjusted for chronological age.
outcome	beta	p	FDR p
Organismal	-0.0361115	1.27656e-11	1.65953e-10
Conventional	-0.0336905	5.6467e-11	3.67035e-10
Intestine	-0.0314574	2.60818e-08	1.13021e-07
Brain	-0.0360293	1.21527e-07	3.94963e-07
Pancreas	-0.0215037	6.0626e-07	1.57628e-06
Lung	-0.021507	9.87286e-07	2.13912e-06
Immune	-0.0288235	4.22542e-06	7.13334e-06
Adipose	-0.0130626	4.38975e-06	7.13334e-06
Kidney	-0.00804647	4.22638e-05	6.10477e-05
Heart	-0.0153984	0.00014732	0.000191515
Liver	-0.0206791	0.00224934	0.00265832
Muscle	-0.00449656	0.237883	0.257706
Artery	-0.00545362	0.422523	0.422523

## Sheet: S8. UKB cell ages
Table S8. Results of linear models testing associations of age at menopause with organ age gaps in UKB, adjusted for chronological age.
outcome	beta	p	FDR p
macrophages	-0.0140665	6.59591e-14	2.5724e-12
proximal enterocytes	-0.0132125	3.25219e-12	4.2481e-11
syncytiotrophoblasts	-0.0114073	3.98191e-12	4.2481e-11
alveolar cells type 2	-0.0128697	4.35703e-12	4.2481e-11
adipocytes	-0.0118421	8.12234e-10	6.33542e-09
exocrine glandular cells	-0.0110082	6.1722e-09	4.01193e-08
oligodendrocyte precursor cells	-0.00988907	1.43717e-07	7.10973e-07
nk cells	-0.0100978	1.45841e-07	7.10973e-07
cardiomyocytes	-0.00978331	2.89278e-07	1.23445e-06
skeletal myocytes	-0.00939017	3.16527e-07	1.23445e-06
b cells	-0.00968572	3.57378e-07	1.26707e-06
gastric mucus secreting cells	-0.00941943	5.58369e-07	1.8147e-06
muller glia cells	-0.00908638	1.128e-06	3.384e-06
suprabasal keratinocytes	-0.00897668	1.74212e-06	4.85304e-06
extravillous trophoblasts	-0.00885669	2.7416e-06	7.01251e-06
plasma cells	-0.00882706	2.87693e-06	7.01251e-06
t cells	-0.00828215	8.15118e-06	1.86998e-05
intestinal goblet cells	-0.00824401	1.31264e-05	2.81329e-05
monocytes	-0.00822837	1.37058e-05	2.81329e-05
hepatocytes	-0.00813266	1.9136e-05	3.73151e-05
dendritic cells	-0.00822079	2.3728e-05	4.40663e-05
oligodendrocytes	-0.0072385	0.0001028	0.000182236
NEFL-C1QL2 projection neuron cells	-0.00692937	0.000137475	0.000233109
astrocytes	-0.00728442	0.000174694	0.000283877
oocytes	-0.00455061	0.000304205	0.00047456
schwann cells	-0.00690341	0.000327032	0.000490548
enteroendocrine cells	-0.00679145	0.000652314	0.000942231
granulocytes	-0.00556385	0.00404599	0.00563548
fibroblasts	-0.00488367	0.00772969	0.0103951
cone photoreceptor cells	-0.00491652	0.00967591	0.0125787
endothelial cells	-0.00474284	0.0110519	0.013904
microglial cells	-0.00391011	0.0355262	0.0432975
distal enterocytes	-0.00322161	0.0376433	0.0444875
proximal tubular cells	-0.00345135	0.0684984	0.0785717
serous glandular cells	-0.00220781	0.242381	0.270081
excitatory neurons	-0.00206826	0.270103	0.292611
inhibitory neurons	0.00134924	0.477081	0.502869
smooth muscle cells	-0.00109432	0.560796	0.575554

## Sheet: S9. Female tissue
S9. Proteins negatively associated with age at menopause in UKB with female tissue enrichments.
protein	beta for age at menopause	FDR p	female reproductive enriched	ovary enriched	cervix enriched	endometrium enriched	fallopian tube enriched	breast enriched	vagina enriched	placenta enriched
KLK8	-0.00199293	0.0294148	TRUE	FALSE	TRUE	FALSE	FALSE	FALSE	TRUE	FALSE
TFPI2	-0.00227402	0.0106666	TRUE	FALSE	FALSE	FALSE	FALSE	FALSE	FALSE	TRUE
PLIN1	-0.00231665	0.0103521	TRUE	FALSE	FALSE	FALSE	FALSE	TRUE	FALSE	FALSE
ADAM12	-0.00247767	0.00225562	TRUE	FALSE	FALSE	FALSE	FALSE	FALSE	FALSE	TRUE
IL1RL1	-0.00278932	0.0102616	TRUE	FALSE	FALSE	FALSE	FALSE	FALSE	FALSE	TRUE
INSL4	-0.00284759	0.0248712	TRUE	FALSE	FALSE	FALSE	FALSE	FALSE	FALSE	TRUE
KLK10	-0.00288376	0.00226165	TRUE	FALSE	TRUE	FALSE	FALSE	FALSE	TRUE	FALSE
PRRT3	-0.00310208	0.000631	TRUE	FALSE	FALSE	FALSE	TRUE	FALSE	FALSE	FALSE
BPIFB1	-0.00346363	0.0274202	TRUE	FALSE	TRUE	FALSE	FALSE	FALSE	FALSE	FALSE
MMP10	-0.00388241	0.00510415	TRUE	FALSE	FALSE	TRUE	FALSE	FALSE	FALSE	FALSE
NECTIN4	-0.00396934	3.8e-09	TRUE	FALSE	TRUE	FALSE	FALSE	FALSE	TRUE	FALSE
DLK1	-0.00439076	0.000214	TRUE	FALSE	FALSE	FALSE	FALSE	FALSE	FALSE	TRUE
HGF	-0.00454568	1.82e-08	TRUE	FALSE	FALSE	FALSE	FALSE	FALSE	FALSE	TRUE
GPR15L	-0.00454857	0.00141593	TRUE	FALSE	TRUE	FALSE	FALSE	FALSE	TRUE	FALSE
IL19	-0.00500815	0.00249325	TRUE	FALSE	TRUE	FALSE	FALSE	FALSE	FALSE	FALSE
TFF3	-0.00617937	1.69e-11	TRUE	FALSE	TRUE	FALSE	FALSE	FALSE	FALSE	FALSE
LEP	-0.00725772	0.00109434	TRUE	FALSE	FALSE	FALSE	FALSE	TRUE	FALSE	FALSE
FABP4	-0.00789362	3.52e-09	TRUE	FALSE	FALSE	FALSE	FALSE	TRUE	FALSE	FALSE
KLK12	-0.00825521	0.0178559	TRUE	FALSE	TRUE	FALSE	FALSE	FALSE	TRUE	FALSE
ALPP	-0.0222754	6.53e-18	TRUE	FALSE	TRUE	FALSE	FALSE	FALSE	FALSE	TRUE

## Sheet: S10. UKB surg meno
Table S10. Results of linear models testing associations of surgical menopause with proteins in UKB, adjusted for chronological age, age at menopause, and hormone therapy use.
protein	beta	p	FDR p
ENPP2	0.129694	3.82967e-16	1.11596e-12
WFIKKN2	-0.163267	3.90773e-14	5.69357e-11
RSPO3	-0.106695	7.73784e-11	7.51602e-08
CEACAM16	0.266862	1.10185e-09	8.02695e-07
KLK4	-0.198871	5.54116e-09	1.98151e-06
LEFTY2	-0.16047	5.64894e-09	1.98151e-06
RSPO1	-0.114885	6.03826e-09	1.98151e-06
CGA	-0.202774	6.25875e-09	1.98151e-06
HSD11B1	-0.139118	6.34657e-09	1.98151e-06
CDH3	-0.119592	6.79996e-09	1.98151e-06
SERPINF1	0.0969648	1.65763e-08	4.39121e-06
RET	0.122293	1.3713e-07	3.32997e-05
GHR	0.0920738	2.37306e-07	5.3193e-05
LDLR	0.160915	2.68905e-07	5.59706e-05
CES1	0.242779	4.31094e-07	8.37472e-05
CFI	0.0612381	8.59318e-07	0.000156503
IGSF9	0.244981	1.42539e-06	0.000233432
IL17RB	-0.153508	1.44193e-06	0.000233432
PON3	-0.089215	1.87074e-06	0.000286913
APOF	-0.075614	3.25156e-06	0.000473752
COL9A1	-0.129605	4.55014e-06	0.000631386
PAMR1	0.0741778	6.1364e-06	0.000812794
FURIN	0.0963537	6.59496e-06	0.000835553
IGFBP2	-0.180385	8.79501e-06	0.00106786
CA14	-0.0918532	1.05482e-05	0.0012295
EDA2R	-0.0901847	1.65428e-05	0.0017891
UPB1	0.236673	1.65771e-05	0.0017891
GSTA1	0.221827	1.72272e-05	0.00179286
AFM	0.048533	2.33287e-05	0.00234413
CFP	0.0551848	3.12118e-05	0.00303171
IL32	-0.101465	3.53555e-05	0.00332342
F7	0.0726274	3.69568e-05	0.00332356
CD200	-0.0628822	3.82163e-05	0.00332356
LCAT	0.0541694	3.87786e-05	0.00332356
ADIPOQ	-0.172621	4.00178e-05	0.00333177
ATRN	0.0395323	4.39098e-05	0.00348174
PZP	0.140326	4.42087e-05	0.00348174
LEP	0.226193	4.99169e-05	0.00382784
MAMDC4	0.124702	5.87602e-05	0.00430668
CKB	-0.155797	5.91171e-05	0.00430668
MMP10	-0.133595	8.83296e-05	0.00627786
CHRDL2	-0.114596	0.00010555	0.00732317
NHLRC3	0.0731634	0.000109527	0.00742238
AGR3	0.136436	0.000113622	0.00752486
CPB2	0.0483628	0.000158913	0.0102905
NPY	0.142702	0.000174433	0.0110499
WFDC2	-0.0890472	0.000178992	0.0110975
ODAM	-0.122354	0.000212653	0.0126506
IGFBP1	-0.274391	0.000212725	0.0126506
PTPRK	0.0472843	0.000245774	0.0141106
SOST	0.0818587	0.000246959	0.0141106
ESM1	-0.0734203	0.000302769	0.0169667
NAGPA	0.0442676	0.000309978	0.0169916
WNT9A	-0.0597978	0.000314876	0.0169916
SERPINF2	0.028647	0.000329538	0.0174595
SSC4D	0.237	0.000338241	0.0176006
BTD	0.0430629	0.000344502	0.0176119
SETMAR	0.0621917	0.000368241	0.0185009
INHBC	0.0979614	0.000383338	0.018933
NGRN	0.0450045	0.000477667	0.0231987
PRAP1	0.0954593	0.000493676	0.0235831
PRG3	-0.10138	0.00052769	0.0248014
PCSK9	0.0775404	0.000589899	0.0272852
CPE	-0.0756905	0.000617988	0.0281378
TMPRSS11D	-0.0779689	0.00063484	0.0284604
ACY1	0.123693	0.000649079	0.0286578
PDGFC	0.0575556	0.000668434	0.02897
LPL	-0.0910501	0.000676032	0.02897
GHRL	-0.168339	0.00068619	0.0289791
A1BG	0.0335696	0.000746498	0.0307594
ADH1B	0.149639	0.000761335	0.0307594
ADH4	0.172324	0.000767585	0.0307594
KLKB1	0.0483513	0.000786958	0.0307594
FTCD	0.17133	0.000794368	0.0307594
LGALS3BP	0.0611487	0.000794371	0.0307594
PROC	0.048178	0.000811363	0.0307594
CD163	0.08683	0.000822111	0.0307594
FUOM	0.12708	0.000823346	0.0307594
ERBB3	0.0359608	0.000868752	0.0320449
LTBP2	-0.0619214	0.000882832	0.0321572
IFNAR1	0.048521	0.00107647	0.0387262
ANGPTL2	0.0792692	0.00112279	0.0399
EPO	0.135608	0.00121235	0.0422658
BGN	0.229798	0.00121837	0.0422658
IL13RA1	0.0395782	0.00127892	0.0438445
C3	0.0904346	0.00129793	0.0439788
GSTA3	0.150395	0.00140966	0.046912
NPPC	-0.0798135	0.0014167	0.046912
BCHE	0.0516932	0.00153786	0.0503519
FOLR1	-0.0526138	0.00157246	0.0509128
NCAM2	-0.0514565	0.00159343	0.0510247
VEGFD	-0.0636495	0.00165524	0.0524279
IL18R1	0.0632056	0.00170945	0.0535628
RARRES2	0.0928311	0.00173301	0.0537234
SIGLEC7	0.0511816	0.00183271	0.056216
SSC5D	0.0787114	0.00185741	0.0563802
ART3	-0.0609948	0.00192432	0.057809
PLTP	-0.0631051	0.00198604	0.0590542
TMPRSS15	0.166494	0.00203613	0.059932
HS6ST1	0.0600486	0.00212576	0.0619447
F10	0.047111	0.00215191	0.0620857
MVK	0.14243	0.00218034	0.0622893
SEZ6L2	-0.0406188	0.00220228	0.0623053
CRELD1	0.0687833	0.00238426	0.0668051
CFB	0.0594523	0.00252977	0.0702072
CTSL	0.0424954	0.00256065	0.0703938
FSHB	-0.105459	0.00261911	0.070886
GH1	-0.302788	0.00263771	0.070886
LRIG1	0.0597603	0.00265154	0.070886
EDNRB	0.0802654	0.0027647	0.0732393
MXRA8	-0.0557097	0.00304287	0.0792998
FLT3LG	-0.0561341	0.0030479	0.0792998
CTSB	-0.0948746	0.00333928	0.0860273
VCAN	-0.0520212	0.00336552	0.0860273
VSNL1	0.0632593	0.00362997	0.0919803
PRG2	-0.0888884	0.00367351	0.0922811
SCGB3A1	-0.043839	0.0037562	0.0935518
CLUL1	-0.0782872	0.00382151	0.0943717
MBL2	-0.175965	0.00387998	0.0950105
CFHR2	0.0955135	0.0042661	0.103595
PLAT	0.0889032	0.00439344	0.10488
ELN	-0.0584461	0.00440655	0.10488
MYOM1	0.0787793	0.00442828	0.10488
SELE	0.0859104	0.00446299	0.10488
MFGE8	0.0689633	0.004697	0.109496
ACY3	0.0911223	0.00484765	0.112112
FLT4	0.055762	0.00492046	0.112899
PLIN1	0.060878	0.00520015	0.117767
ACE	0.0416771	0.00521342	0.117767
KRT18	0.131063	0.00553914	0.124162
MDK	-0.08385	0.00560463	0.124671
CLEC5A	-0.0473004	0.00569824	0.125793
EZR	0.0388598	0.00589663	0.129194
MUC13	0.0796168	0.00603631	0.131113
GLA	0.0593576	0.00607422	0.131113
SERPINI2	0.0893159	0.0061954	0.132745
CKMT1A_CKMT1B	0.116117	0.00627566	0.133484
LGALS4	0.0854073	0.00642249	0.135369
ROR1	-0.0501243	0.00649705	0.135369
PCBD1	0.075519	0.00651797	0.135369
GPR37	0.108094	0.00655011	0.135369
SRPX	-0.0516615	0.00660457	0.135533
FAM20A	0.0456609	0.00665255	0.135563
TNFRSF8	-0.0721957	0.00671988	0.135984
POF1B	0.0732064	0.00676902	0.136034
LAMP2	0.0292868	0.00691004	0.137917
GAL	-0.0988142	0.00695803	0.13793
F9	0.0305407	0.00707629	0.139326
SIGLEC1	0.0703905	0.00729538	0.142676
REN	-0.114872	0.00742541	0.144251
PTPRC	0.0357421	0.00750615	0.144854
C1S	0.0325007	0.00769051	0.147435
ADGRG2	-0.0436183	0.00795984	0.151601
CXCL12	-0.0628648	0.00804208	0.152173
CLEC3B	0.0315165	0.00820879	0.154325
STAB2	0.0448627	0.00839226	0.156097
SPINK2	0.0598369	0.00841018	0.156097
LGALS3	0.0459794	0.00854484	0.157593
AGXT	0.118336	0.0086145	0.157878
SPRR3	-0.110613	0.00876048	0.159286
PDCD6	-0.106268	0.00881489	0.159286
TNR	0.0663762	0.00888731	0.159286
CSH1	0.0428869	0.00890995	0.159286
ICOSLG	-0.029529	0.00909573	0.161616
PMCH	-0.129139	0.00920396	0.161851
TNFRSF10A	0.0510869	0.00922006	0.161851
MME	0.127197	0.00932519	0.162716
ALPP	-0.181676	0.0093973	0.162998
SUSD2	-0.045522	0.00951364	0.16332
REG3A	-0.0942685	0.00952791	0.16332
ACE2	0.0757522	0.00958505	0.163338
ANGPT2	0.0563427	0.0100643	0.170509
ANK2	0.111783	0.0103155	0.173753
NFATC3	0.0883474	0.0106107	0.177699
HEG1	0.0393161	0.0109069	0.181085
CEACAM5	-0.103895	0.0109372	0.181085
PAPPA	-0.0679305	0.0110094	0.18125
CCL19	0.198944	0.0110884	0.181526
MYL1	0.0630153	0.0113032	0.184009
FGF5	-0.048857	0.0113885	0.184367
AGBL2	0.131188	0.0115634	0.186164
RTBDN	-0.0429804	0.0117153	0.187573
IGDCC4	-0.0379401	0.0119816	0.190788
CHL1	-0.0454573	0.0122845	0.194548
AMOT	0.0564563	0.0124652	0.194575
B2M	0.0495914	0.0124781	0.194575
THBS2	-0.0523478	0.0125978	0.194575
AGER	-0.0624247	0.0126734	0.194575
DSG2	-0.039266	0.0126921	0.194575
ITGA11	-0.0499435	0.0127298	0.194575
NCAM1	-0.0416148	0.0127535	0.194575
TGFBR3	-0.0465941	0.0128469	0.194978
HSD17B14	0.0894177	0.0130616	0.195454
KDR	0.0360649	0.0130621	0.195454
HLA_DRA	0.0532756	0.0131041	0.195454
CXCL9	-0.0985208	0.0131465	0.195454
PLCB1	0.0654203	0.013315	0.195546
EPHB4	-0.0359033	0.0133432	0.195546
SMPDL3A	-0.0936335	0.013354	0.195546
THBS4	0.0675809	0.0134268	0.195629
GIPR	-0.0705722	0.013837	0.199363
VNN1	0.104947	0.0138531	0.199363
ADGRF5	-0.0421327	0.0138884	0.199363
NID1	-0.0571775	0.014312	0.204437
C1QTNF1	0.0608155	0.0144821	0.205858
CEACAM6	-0.0580878	0.0146333	0.206998
MEGF9	0.0278713	0.0148731	0.208833
TNFSF13	-0.0374047	0.0149606	0.208833
ACAN	-0.0403935	0.0149781	0.208833
IGLC2	0.0350013	0.0152658	0.211831
LYVE1	0.0278535	0.0155191	0.214325
HAO1	0.185884	0.0156187	0.214684
CPM	0.0512259	0.0158241	0.216485
ADAMTS8	-0.0635617	0.0160246	0.218204
MAGED1	0.0687392	0.0161013	0.218229
KRT17	-0.0524651	0.0163826	0.221014
S100A14	0.0766721	0.0164735	0.221216
SF3B4	-0.104531	0.016987	0.227064
MTUS1	0.0770517	0.017138	0.227982
IGSF3	0.0476217	0.0172121	0.227982
RPA2	0.0435379	0.0174462	0.230038
OXT	0.18995	0.0177092	0.232182
SLAMF7	-0.0807275	0.0177682	0.232182
DSG4	-0.0734606	0.0184102	0.239497
CHGB	-0.0562011	0.018929	0.245152
FETUB	0.0449321	0.0192637	0.246195
CRHBP	0.0391487	0.0192644	0.246195
KHDC3L	0.0936637	0.0193181	0.246195
IL22RA1	0.0590542	0.0193475	0.246195
PAK4	0.0831216	0.0198039	0.25018
KYNU	0.0613806	0.0198324	0.25018
KLK6	-0.0421504	0.0201392	0.252955
PTX3	-0.0671391	0.0205175	0.255816
ARSA	0.0607203	0.0205426	0.255816
DMP1	-0.0851638	0.0206344	0.255867
IL17A	0.060692	0.0207861	0.256656
ECHDC3	0.100335	0.0211803	0.260419
FAM3C	-0.0399596	0.0213276	0.261128
NBL1	-0.0360004	0.0214916	0.262036
WIF1	-0.046552	0.0218351	0.264854
NOP56	0.149856	0.0219045	0.264854
PLXDC2	0.0354624	0.0222922	0.268427
HS6ST2	-0.0404999	0.0224946	0.269325
PTH	0.107958	0.022569	0.269325
PLA2G7	-0.0422612	0.0227236	0.269325
ENO3	0.0765426	0.0227364	0.269325
GPKOW	0.0382301	0.0228391	0.269446
SCGB1A1	-0.0770998	0.0231184	0.271641
CCL16	0.0699734	0.0233878	0.273435
IL18	0.0649736	0.0234715	0.273435
KRT14	-0.0386765	0.0235525	0.273435
STC2	0.0333376	0.023709	0.274159
TP53	0.0569592	0.0241316	0.276525
PLA2G1B	-0.0566897	0.0242297	0.276525
IGDCC3	0.0652682	0.0242534	0.276525
PBLD	0.067542	0.0243276	0.276525
DTX3	-0.0313074	0.0243881	0.276525
ST3GAL1	-0.0551197	0.0246056	0.27791
CD28	0.0485072	0.0247317	0.278255
MAN1A2	0.0325386	0.0249275	0.279377
PTS	0.075433	0.0250231	0.279377
BCL7A	0.0831595	0.0255	0.283327
LAMA4	-0.0425572	0.0255714	0.283327
ADAM12	0.0445301	0.0257921	0.28469
EIF5A	0.0384852	0.0260161	0.286079
KHK	0.0840299	0.0268111	0.293712
PALM2	0.0515882	0.0269811	0.294468
PRSS27	-0.0526899	0.0271801	0.295532
IL24	-0.0631299	0.0274651	0.296761
FGF21	0.156035	0.0275005	0.296761
KLK10	-0.0516816	0.0275985	0.296761
CEACAM1	-0.0295107	0.0280313	0.300099
GALNT7	-0.0267983	0.028115	0.300099
CRYGD	-0.1232	0.0284949	0.302293
FABP9	-0.0728422	0.028528	0.302293
APCS	0.0492592	0.0286877	0.302529
LAYN	-0.0433172	0.0288107	0.302529
PCDH9	0.0423213	0.0288617	0.302529
TNFSF8	0.0450978	0.0298395	0.311657
TCTN3	0.0366808	0.0303231	0.315577
IL1RAP	-0.0558785	0.0307104	0.31847
HLA_E	-0.0370184	0.0310749	0.321107
VGF	-0.0388206	0.0312624	0.321158
IL1RL2	0.0481534	0.0313002	0.321158
FCN2	0.0512834	0.0315845	0.322938
PTPRH	0.0596337	0.0317477	0.323471
CSF2RB	0.0548279	0.0320257	0.324793
F2	0.0181736	0.0321003	0.324793
BMPER	0.028185	0.0324339	0.327032
CCDC80	-0.0456564	0.0328545	0.330131
ATP6V1G2	-0.125866	0.0335947	0.336409
CXCL16	0.0303003	0.0340429	0.339729
SHC1	0.143814	0.0343968	0.341524
AKR7L	0.0862159	0.0344571	0.341524
CHAD	-0.0635077	0.0346237	0.342011
SCLY	0.0596427	0.0349014	0.343476
NTRK3	-0.0282179	0.0350076	0.343476
CDH2	0.044083	0.0355224	0.347148
PTPRZ1	-0.0401276	0.0356202	0.347148
SCGB3A2	-0.112979	0.03625	0.350428
COL4A1	-0.0501301	0.0363592	0.350428
C1R	0.022987	0.0364648	0.350428
RBP2	-0.0942635	0.0365483	0.350428
SCT	-0.057462	0.0365612	0.350428
ADM	0.0375067	0.0366783	0.350428
LIPF	-0.0725319	0.0377498	0.359194
GAST	0.161442	0.0378781	0.359194
GPC1	-0.0352533	0.0380668	0.359194
FCAMR	0.0931073	0.0380889	0.359194
SEZ6L	-0.0343213	0.0385031	0.361001
RAB6B	-0.058763	0.0385282	0.361001
GPR158	-0.0449425	0.0388633	0.362973
PTPRB	0.0344479	0.0391816	0.364777
ITGAL	0.0531656	0.0395232	0.366785
LTBR	-0.0339144	0.0398505	0.367428
FABP4	0.0727434	0.0398881	0.367428
FGFR4	-0.0649554	0.0400883	0.367428
C2ORF69	0.0707157	0.0400968	0.367428
TFAP2A	0.0702468	0.0403555	0.367728
MCAM	-0.0409105	0.0403819	0.367728
PTPRN2	-0.0389447	0.040604	0.368599
CTSH	0.0878751	0.040741	0.368694
MPRIP	0.0522844	0.0414853	0.374135
RIDA	0.0612855	0.0415991	0.374135
CCL14	0.0478488	0.0431662	0.386116
CALB1	-0.0514159	0.0432773	0.386116
NECTIN4	-0.0361894	0.0433971	0.386116
NOTCH3	-0.0402816	0.0434766	0.386116
CALCB	-0.0457753	0.0435938	0.386116
LY75	-0.0454167	0.0439159	0.387791
SNX18	0.0519106	0.0443299	0.390264
FASLG	0.0435711	0.044486	0.390459
PPME1	-0.0739028	0.0446811	0.390994
FGF3	0.0351502	0.0448651	0.391105
MSMB	-0.0849375	0.0449623	0.391105
PRDX6	-0.0717453	0.0452939	0.392817
MATN3	-0.0355029	0.0454502	0.393002
IDS	-0.00999242	0.0457873	0.393684
NRP1	-0.0326903	0.0457993	0.393684
SH3BGRL2	0.0723598	0.0459777	0.394056
DPP6	-0.0403504	0.0463813	0.395069
NT5C1A	0.0387213	0.0464119	0.395069
GCG	0.149063	0.0465026	0.395069
NME3	-0.0272492	0.0466606	0.395258
CA9	-0.0542198	0.0470036	0.395549
NOMO1	0.0281672	0.0471815	0.395549
VSIG10L	0.0383714	0.0471927	0.395549
SERPIND1	0.0323819	0.0472378	0.395549
GFRA3	-0.0329646	0.0473985	0.395757
ICAM5	-0.0527808	0.0478233	0.398163
ULBP2	-0.043709	0.048142	0.398233
PDIA2	0.046867	0.0482067	0.398233
CDHR5	0.0464572	0.0482416	0.398233
FZD8	0.0496148	0.0484875	0.398903
IL3	0.0684007	0.0488445	0.398903
ADAMTS16	-0.0358797	0.0489343	0.398903
CLINT1	0.0525464	0.0490041	0.398903
SIT1	0.0672144	0.0490073	0.398903
GGT5	0.0260434	0.049314	0.400001
GUSB	0.0728174	0.0495799	0.400001
TET2	-0.113753	0.0497935	0.400001
KLRD1	0.0529972	0.0497942	0.400001
LRIG3	0.032566	0.0498286	0.400001
CSPG4	-0.0376078	0.0500205	0.400439
FLT1	-0.0240942	0.0502333	0.401041
ECSCR	0.0587779	0.0510206	0.406213
ARID3A	0.0456133	0.0513589	0.407707
SERPINA1	0.00904178	0.0514881	0.407707
C2	0.0275065	0.0516858	0.408164
GPD1	0.0614601	0.0519061	0.408796
CNTN1	-0.0316786	0.0521754	0.409809
COMP	0.0385274	0.0524125	0.410564
ERVV_1	-0.0515306	0.0525844	0.410806
ADAMTSL2	0.0366227	0.0529019	0.412182
AGR2	0.116038	0.0532231	0.413579
LYPD8	0.0576367	0.0537472	0.415229
GDF2	-0.0411536	0.0539072	0.415229
EDAR	-0.103679	0.0539361	0.415229
TDO2	0.0432775	0.0540054	0.415229
ASAH2	0.0588103	0.0541722	0.415415
VWA5A	0.0883314	0.0543462	0.415656
C4BPB	0.0455663	0.0545471	0.4161
CRNN	-0.0754361	0.0547141	0.416285
ITGB7	0.050675	0.0548685	0.416372
MSR1	0.0512297	0.055206	0.417845
PROS1	0.0270471	0.0557621	0.42096
COL3A1	0.0255944	0.0560726	0.422211
IFNGR2	0.0579482	0.0565056	0.424375
DKK3	-0.0335636	0.0569768	0.426813
CDH5	-0.0334787	0.0575739	0.43018
CENPF	-0.0628714	0.0581462	0.433346
IL19	-0.0777353	0.0586812	0.435469
IL17C	-0.0801863	0.05873	0.435469
XPNPEP2	-0.0947638	0.0590999	0.437099
VCPKMT	0.0962393	0.0592544	0.437133
CSF1R	0.0438518	0.0594125	0.437192
LILRA2	0.0401073	0.060024	0.439537
CCL27	-0.0643704	0.0600328	0.439537
C9	-0.0528453	0.0622251	0.454308
SUOX	0.0681889	0.0623622	0.454308
AIFM1	0.115791	0.0627101	0.454663
CCL17	-0.100396	0.0627229	0.454663
RAB6A	-0.0519496	0.0629329	0.455053
SIRPA	-0.0619304	0.0641794	0.462918
CFD	0.0227434	0.0648295	0.466452
PDP1	0.0538644	0.0650141	0.466628
CA3	-0.0670044	0.0653864	0.467199
SUMF2	0.0569252	0.0654143	0.467199
AMBP	0.022175	0.065909	0.469205
SERPINI1	-0.0329317	0.0660171	0.469205
ADGRB3	-0.0358123	0.066525	0.471263
CCN3	-0.0367325	0.0666842	0.471263
BMP10	-0.0313164	0.0667919	0.471263
CD300LG	-0.0399213	0.0675621	0.475545
CACNB1	-0.0642722	0.0681558	0.478568
CAMKK1	0.0471021	0.0684706	0.479623
NOS3	0.0583892	0.069195	0.482424
S100G	-0.0474068	0.0692015	0.482424
PTN	-0.05179	0.0699421	0.486423
ARTN	-0.048261	0.0704692	0.487525
GID8	0.0342121	0.0706125	0.487525
BAG3	0.0423627	0.0706342	0.487525
TCL1A	0.101127	0.0707698	0.487525
FUT1	0.0685405	0.0713177	0.489081
KAZALD1	-0.0474068	0.0713313	0.489081
RGMB	-0.0269895	0.0715897	0.4897
PCDH12	0.0265111	0.0719205	0.48997
CDH17	0.0725405	0.0719654	0.48997
ZNF830	0.0827065	0.0728916	0.495119
PRUNE2	0.031482	0.0734098	0.497479
POLR2A	0.0311715	0.0739536	0.49899
CRLF1	0.0266375	0.0739752	0.49899
PTPN9	0.0408303	0.0742367	0.499597
CNTN4	-0.0249395	0.0756043	0.507377
SCRG1	-0.0276417	0.0758656	0.507377
KIAA1549L	0.0299848	0.075915	0.507377
CRHR1	0.064784	0.0763261	0.508957
MMP15	-0.0510162	0.0766878	0.509694
SERPINA12	0.115483	0.0767865	0.509694
SGSH	0.0580149	0.0772525	0.511622
CCN5	0.0412543	0.077441	0.511708
ASGR1	0.0320856	0.0777646	0.512683
CD164	0.0265806	0.0784548	0.515715
LAP3	0.0501039	0.0787074	0.515715
PECAM1	0.031079	0.0787555	0.515715
SNED1	0.0337644	0.0790579	0.515771
OBP2B	-0.0654339	0.0791179	0.515771
KLRF1	0.0448735	0.0798893	0.518256
VWA1	0.0430917	0.0798937	0.518256
ADAM23	-0.0355398	0.0801017	0.518256
CHI3L1	0.0785774	0.0802105	0.518256
BPIFB2	0.0760205	0.0814028	0.524796
CDHR1	0.0441866	0.0818622	0.525214
EVI2B	-0.0420044	0.0818835	0.525214
CX3CL1	-0.0341065	0.0820084	0.525214
PPY	0.103922	0.082898	0.529747
SCARB1	-0.0586305	0.0830857	0.529785
CD82	0.0421798	0.0835955	0.530979
ADAMTS13	0.0230136	0.0836374	0.530979
FGFBP3	-0.0360947	0.0841815	0.532756
PSAPL1	-0.0505594	0.0843899	0.532756
GNGT1	0.0543134	0.0844657	0.532756
GPHA2	-0.0477381	0.0848537	0.534047
CRIM1	-0.0204186	0.0855571	0.53674
NXPH3	-0.0303427	0.0859327	0.53674
SEMA3F	0.0277416	0.0860609	0.53674
CLU	0.0314242	0.0863119	0.53674
NTRK2	0.0250426	0.0864731	0.53674
PRRT3	-0.0391861	0.086654	0.53674
BRD2	0.0341725	0.0867259	0.53674
CD6	0.0539031	0.0867551	0.53674
DYNC1H1	0.046233	0.0874614	0.539133
VMO1	0.0673703	0.0875121	0.539133
DYNLT3	0.0434538	0.0879805	0.540319
IL22	-0.0661082	0.0886152	0.540319
MORF4L2	0.0373882	0.0887639	0.540319
VSTM2L	0.0560885	0.088822	0.540319
CPA4	-0.0435242	0.0888285	0.540319
SKAP1	0.0746379	0.0889917	0.540319
ERBB2	0.0238778	0.0891807	0.540319
DCXR	0.0527167	0.0891878	0.540319
LPA	0.172797	0.0896933	0.542254
FST	0.0495345	0.0917898	0.553779
FKBP7	0.0479259	0.0922644	0.55498
TNXB	-0.024312	0.092554	0.55498
GPA33	0.1364	0.0925602	0.55498
CLEC6A	-0.0466419	0.0932463	0.557946
BAIAP2	0.06271	0.093702	0.558859
IL33	-0.0385287	0.0937851	0.558859
HDDC2	-0.0434295	0.0939743	0.558859
C19ORF12	0.0624787	0.0950044	0.563835
TIGIT	-0.0348484	0.0954685	0.564941
ITIH1	0.0183398	0.0957363	0.564941
CLEC10A	-0.0347536	0.0960407	0.564941
IL9	0.0560664	0.0960655	0.564941
PLG	0.0214696	0.0961601	0.564941
GHRHR	0.055009	0.096939	0.56837
GPRC5C	0.0541566	0.0982196	0.574723
YY1	0.027226	0.0986284	0.575804
GGH	0.0355568	0.0987995	0.575804
LPCAT2	-0.0393392	0.0996286	0.578832
POSTN	-0.0353684	0.0997247	0.578832
CXCL17	-0.0453757	0.0999151	0.578832
GGT1	0.0480687	0.100122	0.578881
MANSC1	-0.0261787	0.101115	0.583462
AOC3	-0.0289448	0.101652	0.585404
CRELD2	0.0506532	0.103051	0.592289
CCN2	-0.0545847	0.103562	0.594056
HEPACAM2	0.038657	0.10443	0.59751
CAPG	-0.0561564	0.104574	0.59751
LYPD3	-0.031798	0.1051	0.59934
DOC2B	-0.0329654	0.105735	0.600889
CLEC14A	-0.0292023	0.106237	0.600889
EPCAM	0.0964114	0.106272	0.600889
PHLDB1	0.0506717	0.106545	0.600889
MYH9	0.107234	0.106623	0.600889
TFF2	-0.0543584	0.106659	0.600889
ACAA1	0.0785217	0.106816	0.600889
HLA_A	-0.0301286	0.107579	0.604017
PAG1	0.0534655	0.107982	0.604662
ARG1	-0.0509278	0.108109	0.604662
IDUA	0.0428779	0.108887	0.606728
ESR1	0.0536688	0.108904	0.606728
SNCG	0.066465	0.109103	0.606728
VWC2	-0.0369138	0.110254	0.611965
NMRK2	-0.0397512	0.110526	0.612307
OFD1	0.0613883	0.111223	0.614459
ITGB6	-0.0284869	0.111336	0.614459
IL7R	0.0500269	0.112021	0.616293
LILRB1	0.025678	0.112092	0.616293
CNTNAP4	0.0963419	0.112739	0.617193
C7	-0.0285615	0.112824	0.617193
CD93	-0.0291379	0.112891	0.617193
UHRF2	-0.0327949	0.113205	0.61775
GOLM2	0.0213466	0.113656	0.619055
DCBLD2	0.0317055	0.114051	0.620008
OMD	-0.0400572	0.114257	0.620008
AGT	0.0207091	0.114681	0.621155
SELPLG	0.0249835	0.11551	0.623663
IL2RA	-0.0381627	0.115572	0.623663
SNAPIN	0.0520701	0.116147	0.625446
TAFA5	-0.0331946	0.116332	0.625446
HAVCR1	0.0570039	0.116848	0.626112
CKAP4	-0.0250169	0.116886	0.626112
SHMT1	0.0803594	0.117283	0.627088
MANEAL	0.0461377	0.118027	0.628874
GUCA2A	-0.0302365	0.118049	0.628874
TNFSF13B	-0.0248549	0.118666	0.631011
MMP13	-0.0301434	0.119065	0.631975
CACNA1H	0.0550662	0.119435	0.632407
GRPEL1	0.0552237	0.119781	0.632407
CTLA4	0.0267434	0.119797	0.632407
KLK14	-0.0426546	0.120101	0.632867
EPHA2	-0.0279969	0.121088	0.636913
CHIT1	-0.138893	0.121537	0.638123
ANGPTL7	0.0316915	0.122063	0.639733
C1QTNF5	0.0343233	0.123172	0.644384
SNAP25	0.0415873	0.125019	0.652877
SPINK6	0.0491261	0.125533	0.654391
TARM1	-0.0700699	0.126656	0.658611
SPINK5	-0.0281975	0.126884	0.658611
ECHS1	0.0879741	0.127021	0.658611
SLC27A4	0.059459	0.127569	0.660277
FOS	-0.0315743	0.127862	0.66062
SOX9	0.0238512	0.12856	0.6622
PON1	0.0230799	0.128622	0.6622
KLK11	-0.0268796	0.129741	0.66678
MRC1	0.0266422	0.130174	0.667829
AKR1C4	-0.0479817	0.131431	0.672731
STX16	0.0517053	0.131759	0.672731
TNFRSF4	-0.0342174	0.131863	0.672731
EIF5	0.0401336	0.132087	0.672731
TIMP4	-0.0359503	0.132344	0.672731
CPA1	0.0500322	0.132515	0.672731
BGLAP	0.0793618	0.133161	0.674838
PPP1R12B	0.0630431	0.133684	0.67488
LYPD1	-0.056493	0.133823	0.67488
ENG	-0.0149781	0.133872	0.67488
CD36	0.0392392	0.134315	0.67488
COL9A2	0.0407065	0.134327	0.67488
SCG2	-0.0282367	0.134784	0.67601
CES2	0.0479286	0.135559	0.677959
TREH	0.0651189	0.135638	0.677959
PTPRR	-0.0314345	0.136008	0.678644
PDZK1	0.0383206	0.136799	0.681236
FCN1	0.0499661	0.137164	0.681236
PLA2G10	-0.0527871	0.137648	0.681236
HEBP1	0.0494023	0.137871	0.681236
CA5A	0.0813026	0.13793	0.681236
TGFB2	-0.0460087	0.138042	0.681236
PGLYRP4	-0.0547737	0.1382	0.681236
AHSG	0.0235128	0.138398	0.681236
NPDC1	-0.0275085	0.138937	0.681961
PDCD1	-0.0378461	0.139013	0.681961
AIDA	0.0731356	0.139332	0.68223
ENPP5	-0.0359647	0.139536	0.68223
NPL	0.0389784	0.140374	0.685174
FBLN2	-0.0271048	0.14165	0.689158
CDAN1	0.0203284	0.141993	0.689158
SCN3B	0.0395113	0.142234	0.689158
THSD1	0.0290664	0.142459	0.689158
CRX	0.0916492	0.142511	0.689158
PRSS8	0.0369642	0.142872	0.689158
CD84	-0.0266028	0.143007	0.689158
EBI3_IL27	-0.0260204	0.143202	0.689158
NFKBIE	0.0430246	0.143383	0.689158
KRT6C	-0.0343665	0.143555	0.689158
PTGR1	0.0704292	0.14464	0.690505
GBP4	0.0419923	0.144684	0.690505
NTF4	0.033221	0.144895	0.690505
TYRP1	-0.0539521	0.146019	0.690505
MPO	-0.0405098	0.146271	0.690505
CTBS	0.0230665	0.146488	0.690505
CD99L2	0.0207854	0.146541	0.690505
DAND5	0.0463016	0.146791	0.690505
NEFL	-0.0359186	0.146907	0.690505
CD300E	0.0364472	0.147284	0.690505
S100A12	-0.0647364	0.14777	0.690505
GJA8	0.0525167	0.147844	0.690505
PSRC1	0.0498925	0.147868	0.690505
ITM2A	-0.05008	0.148399	0.690505
MAPT	-0.0448077	0.14856	0.690505
CD63	0.0435689	0.148578	0.690505
MAPK9	-0.0364007	0.148736	0.690505
MMP3	-0.0402275	0.149172	0.690505
DDX1	0.0429368	0.149723	0.690505
DCUN1D1	0.064392	0.150213	0.690505
CLEC4D	-0.053916	0.150387	0.690505
HBQ1	-0.0519894	0.150517	0.690505
REPS1	0.0327038	0.150529	0.690505
SPTLC1	0.0300394	0.150601	0.690505
MASP1	0.0190324	0.15061	0.690505
DPEP2	-0.0235192	0.150666	0.690505
FGFBP2	0.0417241	0.150704	0.690505
SLC34A3	0.0414843	0.150705	0.690505
CSF3	0.0418088	0.150707	0.690505
TRIM24	0.0550554	0.15202	0.692806
IL5	0.121165	0.152211	0.692806
MARCO	0.0222675	0.152301	0.692806
ATF2	0.0567521	0.152345	0.692806
LRPAP1	0.048431	0.152398	0.692806
SHISA5	-0.0227204	0.153112	0.694634
DDX39A	0.0182711	0.153585	0.694634
EIF1AX	0.0456905	0.153685	0.694634
DDA1	-0.0340805	0.153957	0.694634
SLITRK2	0.0326492	0.153992	0.694634
CLC	-0.0550742	0.154961	0.696667
CALB2	0.0277711	0.15512	0.696667
CD58	-0.0146628	0.155315	0.696667
MRPL58	0.0604254	0.155472	0.696667
CD300A	0.0254097	0.155638	0.696667
FGF9	0.0345471	0.156515	0.699373
ERP44	0.0214918	0.156723	0.699373
ENTR1	0.047192	0.157408	0.700935
MRPS16	0.024164	0.157554	0.700935
VAT1	-0.0163036	0.158046	0.702052
HJV	0.0371269	0.158294	0.702085
CD302	0.0256863	0.158653	0.702607
FEN1	-0.053376	0.159382	0.704043
TLR3	0.0501286	0.159461	0.704043
OCLN	0.0363066	0.160758	0.707554
CDA	0.0389803	0.160829	0.707554
JAM3	0.0413233	0.161182	0.707554
AHNAK2	0.0232697	0.161227	0.707554
BIRC2	0.0519122	0.162147	0.710043
USP28	0.0300777	0.162759	0.710043
MNAT1	0.0354085	0.162767	0.710043
SEPTIN3	-0.0594193	0.162792	0.710043
ORM1	0.0164939	0.163013	0.710043
BCL2	0.0454761	0.164084	0.713642
C1QA	-0.0178236	0.165077	0.713845
ALCAM	0.0155314	0.16509	0.713845
CTSD	0.0338921	0.16535	0.713845
PLAUR	-0.0230551	0.165511	0.713845
DKKL1	-0.0730049	0.166133	0.713845
SFTPD	0.0542692	0.166245	0.713845
ASPN	-0.0223066	0.166256	0.713845
PNLIPRP1	0.0614245	0.166452	0.713845
MYL6B	0.0740009	0.166713	0.713845
DEFB118	-0.0482841	0.166961	0.713845
LEPR	0.0252989	0.167061	0.713845
IL3RA	0.0263383	0.167105	0.713845
DNAJA1	0.03781	0.167366	0.713845
METAP1	-0.0244039	0.167732	0.713845
PPIE	0.0513727	0.167805	0.713845
SLK	-0.0643304	0.168666	0.715508
HRG	0.024606	0.168687	0.715508
NELL2	-0.0230535	0.169115	0.716281
BCAM	-0.018924	0.169715	0.717014
THRAP3	-0.0937379	0.16978	0.717014
SORBS1	0.0324239	0.170292	0.718136
SERPINC1	0.0116465	0.17057	0.718267
PON2	0.0282456	0.171703	0.721825
CUZD1	0.0294635	0.17191	0.721825
SORD	0.0544638	0.172163	0.721847
CBS	0.0412256	0.172706	0.723084
KIR3DL2	-0.0669017	0.173132	0.723824
TTF2	0.0387766	0.174325	0.726352
DCUN1D2	0.0648436	0.174624	0.726352
CPQ	0.0280608	0.174653	0.726352
C1QTNF6	0.025299	0.174733	0.726352
NUDT2	-0.0450279	0.175084	0.726775
SPON1	-0.0253019	0.175425	0.727152
MEGF10	-0.029356	0.175961	0.728081
BPIFB1	-0.0495637	0.176378	0.728081
CD3G	0.0716755	0.176794	0.728081
AMIGO2	-0.0176695	0.177187	0.728081
DHRS4L2	0.0359998	0.177286	0.728081
ID4	0.0347779	0.177371	0.728081
COL28A1	-0.056267	0.177398	0.728081
FCER2	0.0394445	0.178277	0.730662
KIAA2013	0.0438815	0.178772	0.73166
RBM25	0.0359653	0.17961	0.731976
GABARAPL1	0.0528212	0.17974	0.731976
COL24A1	-0.042971	0.179792	0.731976
ADRA2A	0.0581366	0.179854	0.731976
PLB1	-0.047196	0.180615	0.734049
CLEC4G	0.0261845	0.182139	0.73921
KCNIP4	-0.0396947	0.183057	0.740288
NPR1	-0.0307232	0.183322	0.740288
FDX1	0.0492873	0.183716	0.740288
APOB	0.0171683	0.183776	0.740288
RAD51	-0.0426705	0.183843	0.740288
C8B	0.0231567	0.183929	0.740288
CLEC2L	0.0398924	0.184687	0.741476
LRRC38	0.0387553	0.184733	0.741476
GAD1	0.0200055	0.185786	0.744675
CD72	0.0339313	0.186188	0.74485
SMOC2	-0.0291958	0.18634	0.74485
C1QTNF9	-0.0370276	0.186945	0.745826
MNDA	-0.0789479	0.187096	0.745826
APOD	-0.0337419	0.187408	0.746048
DEFA1_DEFA1B	-0.0423223	0.187695	0.746169
SAA4	0.0228345	0.188645	0.748927
AP3S2	0.0361998	0.189558	0.751526
SERPING1	0.013648	0.189975	0.752155
CXCL10	-0.0521427	0.190526	0.752956
EDN1	0.0225462	0.190694	0.752956
PIK3AP1	-0.048216	0.193167	0.761112
SCG3	-0.0265024	0.193282	0.761112
CRISP3	-0.0205841	0.193623	0.761426
NMI	-0.0541518	0.194368	0.763327
FAM171B	0.0209535	0.195065	0.764989
MAGEA3	-0.0639128	0.195394	0.764989
NPTX2	-0.0238991	0.195683	0.764989
CD40	0.0379606	0.195841	0.764989
PSMA1	0.0345321	0.19709	0.768522
RIPK4	0.0538932	0.197457	0.768522
ADAMTSL4	0.0171918	0.197537	0.768522
RBP5	0.044707	0.198068	0.769091
CEBPA	0.0288796	0.198211	0.769091
RBPMS	0.0509204	0.198944	0.770154
NPHS1	0.024818	0.199326	0.770154
TPPP2	0.0615197	0.199717	0.770154
GPC5	0.0409362	0.199894	0.770154
CCL25	-0.0355959	0.199911	0.770154
LILRB4	0.0347566	0.200071	0.770154
DIPK2B	-0.0196652	0.200816	0.771968
CES3	0.0526901	0.201072	0.771968
FABP6	0.0417377	0.20176	0.772747
GALNT2	-0.0193971	0.201805	0.772747
THPO	0.0284827	0.202128	0.772816
CADPS	0.0315169	0.202354	0.772816
NECTIN2	-0.0217894	0.204129	0.777742
CD40LG	-0.0571604	0.204223	0.777742
DENR	-0.042156	0.204444	0.777742
RNF31	0.0272176	0.205077	0.778822
NCF2	-0.0639817	0.205859	0.778822
RTN4R	0.0275591	0.205959	0.778822
CREG1	-0.0269824	0.206197	0.778822
SFRP1	-0.0329417	0.20627	0.778822
PINLYP	-0.0499589	0.206535	0.778822
PSMG4	-0.0438	0.206599	0.778822
PGLYRP1	-0.0319857	0.206963	0.779013
TSPAN1	-0.0198019	0.207461	0.779013
ATP6V1F	-0.0495939	0.207626	0.779013
HMBS	-0.033923	0.207922	0.779013
SBSN	-0.0250189	0.207994	0.779013
RNASE3	-0.0839707	0.208662	0.779013
RAB44	-0.0318919	0.208711	0.779013
CD7	0.0317992	0.208788	0.779013
LCN2	-0.0294705	0.209626	0.781137
CLGN	0.032596	0.209932	0.78128
SIRPB1	-0.0337488	0.210358	0.781868
TOR1AIP1	0.0388001	0.210982	0.783036
ACTA2	-0.0324051	0.211317	0.783036
TLR2	-0.0168744	0.211479	0.783036
KIR2DL2	0.0634369	0.21175	0.783045
BAG6	0.0262383	0.212359	0.7843
FLI1	0.080229	0.212811	0.784671
FAM171A2	0.11619	0.212998	0.784671
LY6D	-0.0277372	0.213405	0.785178
CPTP	-0.0293838	0.214264	0.785948
RNASET2	-0.0194211	0.214492	0.785948
PKLR	-0.0503394	0.214672	0.785948
PPM1A	0.0228841	0.214896	0.785948
RGMA	-0.0224841	0.214963	0.785948
MUC2	0.0663573	0.215506	0.786949
CXCL8	-0.0507932	0.216004	0.78778
CEP112	0.0324849	0.216698	0.788046
CD244	0.0194525	0.216775	0.788046
MYOM3	-0.0643564	0.21725	0.788046
BATF	0.0629106	0.217383	0.788046
WFDC12	-0.0476326	0.217429	0.788046
CSRP3	-0.0699271	0.217752	0.788237
AHSP	-0.0633944	0.218143	0.788671
MSTN	-0.0362821	0.218826	0.789705
WASL	0.0448986	0.219022	0.789705
NUDT10	0.018673	0.219586	0.789705
GORASP2	0.0334752	0.219717	0.789705
ITGAM	-0.0228037	0.219784	0.789705
SCN2A	-0.0347363	0.220625	0.791743
IL1RN	0.0455337	0.220895	0.791743
DGCR6	0.031411	0.221463	0.792804
VCAM1	-0.0194676	0.222035	0.793684
LGALS8	0.0426022	0.222423	0.793684
ZCCHC8	0.0431463	0.222554	0.793684
CD55	-0.0185582	0.222798	0.793684
TMCO5A	-0.0387724	0.223263	0.794369
LBP	0.0420921	0.224038	0.796154
LAG3	-0.0282981	0.224373	0.796376
FABP2	-0.0550699	0.225937	0.798523
TNN	0.0310288	0.226094	0.798523
TNC	-0.0338573	0.226137	0.798523
GCNT1	-0.0245881	0.22641	0.798523
IFNL2	0.045038	0.226424	0.798523
TDP1	0.0485926	0.226623	0.798523
SERPINA7	0.0129308	0.228966	0.805806
GZMH	-0.0537625	0.230089	0.807842
MYOC	-0.0312195	0.230099	0.807842
PCDH1	0.0152159	0.230763	0.809195
ICAM4	-0.0371006	0.231131	0.809195
ANKRA2	0.0399756	0.231499	0.809195
CD27	-0.0290967	0.231704	0.809195
SMPD1	-0.0327816	0.231873	0.809195
SEPTIN9	-0.0201673	0.232268	0.809604
TNNI3	0.0585448	0.23279	0.810454
PRKAR1A	0.059255	0.233588	0.812263
TOP1MT	0.0355266	0.234764	0.813481
MAEA	0.0284443	0.235136	0.813481
SLC1A4	0.0360478	0.23536	0.813481
MAN2B2	0.0405682	0.235872	0.813481
TPK1	-0.018559	0.236558	0.813481
CCL26	0.0631622	0.236593	0.813481
SUSD5	-0.023824	0.236759	0.813481
GZMB	-0.0440187	0.236974	0.813481
PYY	0.0684702	0.237864	0.813481
DAG1	0.0327635	0.237946	0.813481
CCL20	0.0628502	0.237968	0.813481
LACRT	-0.0368907	0.23819	0.813481
LHB	-0.0562902	0.238492	0.813481
ESAM	-0.0215282	0.23904	0.813481
GYS1	0.0643272	0.239237	0.813481
ABO	0.0994211	0.239448	0.813481
CA4	-0.0164693	0.239569	0.813481
MATN2	-0.0199972	0.240017	0.813481
CALY	-0.0259853	0.240262	0.813481
HNMT	0.0333902	0.240353	0.813481
CXCL3	0.065634	0.24036	0.813481
CGB3_CGB5_CGB8	0.0256021	0.240579	0.813481
SLAMF1	-0.0412834	0.240795	0.813481
IL1R1	-0.0151445	0.240943	0.813481
C1RL	0.0136116	0.241274	0.813481
CPB1	0.0383767	0.241388	0.813481
GNPDA2	0.0248777	0.241476	0.813481
CLEC1A	-0.0221771	0.242231	0.815081
SLITRK1	-0.0229901	0.242783	0.815997
CHRDL1	-0.0208094	0.243688	0.817444
FCRL5	0.0393589	0.243816	0.817444
MMP12	-0.0367119	0.244055	0.817444
GABRA4	-0.0437662	0.244759	0.818669
TNF	-0.0272376	0.244983	0.818669
BSND	0.0232381	0.245317	0.818849
SEMA3G	-0.0292872	0.2461	0.819743
DEFB4A_DEFB4B	0.102738	0.246148	0.819743
OPTC	0.0313999	0.247533	0.823415
TAGLN3	-0.0421617	0.248051	0.82403
FAS	-0.0221646	0.248284	0.82403
DHPS	0.0273961	0.249063	0.825157
KLF4	0.0269049	0.24919	0.825157
BTN2A1	-0.0175888	0.24969	0.825875
LGMN	-0.0243173	0.250367	0.82627
AKT3	0.0386779	0.250382	0.82627
IL20	0.0339266	0.25066	0.82627
CDC27	0.0415396	0.251367	0.827664
CEACAM18	-0.0458054	0.25184	0.827798
PGA4	-0.0471999	0.252736	0.827798
CDC25A	0.0272277	0.252811	0.827798
CEP20	0.0500255	0.252918	0.827798
CD1C	-0.0160238	0.253025	0.827798
IFNLR1	0.0251801	0.253112	0.827798
MOG	-0.0223432	0.253646	0.828424
GSN	-0.012596	0.253872	0.828424
BRME1	-0.0283663	0.254666	0.828589
SEMA7A	-0.0178792	0.254881	0.828589
ADAMTS15	0.0322513	0.255347	0.828589
CD209	0.0260721	0.255706	0.828589
GAS2	0.0339083	0.255744	0.828589
CR2	0.0311722	0.25636	0.828589
REG1A	-0.0331395	0.256432	0.828589
ARAF	0.0444609	0.256687	0.828589
NRXN3	0.0230869	0.257104	0.828589
DCC	0.0152101	0.257142	0.828589
PALM	0.021233	0.257207	0.828589
COL5A1	-0.0260107	0.257335	0.828589
AXL	0.0181486	0.257805	0.829186
CHCHD6	0.0185906	0.25811	0.829254
PALM3	0.0496057	0.258494	0.829572
PRAME	0.0169873	0.259715	0.829586
TPM3	-0.0275565	0.259753	0.829586
MANSC4	-0.044309	0.25977	0.829586
IL1A	-0.0371965	0.259848	0.829586
PVALB	-0.0748664	0.259922	0.829586
ADGRE5	-0.0196791	0.26024	0.829693
HBZ	-0.0689754	0.261386	0.832437
TNFRSF11B	-0.0186108	0.262616	0.83544
TXNDC5	0.0441385	0.263468	0.837238
TOP2B	0.0522327	0.264178	0.838579
RAP1A	0.0451014	0.264511	0.838721
CLMP	0.0146363	0.265675	0.841096
NUCB2	0.0246739	0.265837	0.841096
TXN	-0.0297328	0.266592	0.842271
GKN1	-0.0179806	0.267017	0.842271
PRL	-0.0466244	0.267076	0.842271
RALY	0.031414	0.267761	0.842277
DRAXIN	0.027743	0.267851	0.842277
TNFRSF21	0.0173847	0.267991	0.842277
SERPINA9	-0.0458074	0.268234	0.842277
NECTIN1	0.0210667	0.269056	0.842492
MSLN	-0.0380727	0.269288	0.842492
EDDM3B	-0.027182	0.270523	0.842492
SERPINA11	-0.025997	0.270704	0.842492
SERPINA5	0.0213458	0.270924	0.842492
KLB	0.0470018	0.271311	0.842492
S100A16	0.0399536	0.272066	0.842492
CXCL14	0.0404877	0.272341	0.842492
DDX58	-0.0372814	0.272858	0.842492
MTPN	0.0217126	0.273082	0.842492
CWC15	0.0388651	0.273186	0.842492
FUT3_FUT5	-0.0297128	0.273343	0.842492
LAMP1	-0.0185571	0.273843	0.842492
OSMR	0.0132322	0.274048	0.842492
CLPS	-0.043663	0.274324	0.842492
ADAM9	-0.0188352	0.274406	0.842492
CD8A	0.0315366	0.274614	0.842492
CCND2	0.0236638	0.274736	0.842492
RABEPK	0.0377445	0.274806	0.842492
PDIA3	0.0161201	0.27512	0.842492
MICB_MICA	-0.0959688	0.275226	0.842492
POLR2F	-0.0222759	0.276086	0.842492
SLIT2	0.0332086	0.276101	0.842492
RNASE1	0.0171549	0.276408	0.842492
KRT19	0.0432652	0.276642	0.842492
ENTPD5	-0.0130313	0.276953	0.842492
HRC	-0.0230311	0.277097	0.842492
ITGAX	0.0341609	0.277515	0.842492
TPSAB1	0.0336133	0.27756	0.842492
HGF	0.0232944	0.277618	0.842492
OSM	-0.0471657	0.278077	0.842492
CNTN2	0.0283924	0.278136	0.842492
IFI30	-0.0254969	0.278204	0.842492
C1QL2	0.0279544	0.278342	0.842492
CPVL	-0.0257381	0.27858	0.842492
HYOU1	-0.0139086	0.278854	0.842492
RNASE10	0.0312194	0.279	0.842492
PODXL2	-0.0176853	0.279859	0.844212
APOM	-0.0174293	0.28064	0.84534
RYR1	0.0214021	0.280813	0.84534
USP47	0.0544937	0.281411	0.845471
SMC3	-0.0358987	0.281437	0.845471
OGN	-0.026216	0.282005	0.845827
SCP2	0.0480101	0.282136	0.845827
RTKN2	0.0340121	0.283099	0.845902
PLXNB2	-0.0147205	0.28317	0.845902
PRDX3	0.046042	0.283317	0.845902
CRACR2A	-0.0553804	0.283322	0.845902
NDUFS6	0.0485565	0.284569	0.846487
PHOSPHO1	0.0186382	0.284676	0.846487
FGA	0.019048	0.284677	0.846487
INPP5J	-0.0266847	0.28468	0.846487
OXCT1	-0.0427116	0.285244	0.847299
PTP4A3	0.0339174	0.285757	0.847652
ANGPTL1	-0.0183216	0.285989	0.847652
SSNA1	0.0324191	0.286235	0.847652
CLEC4A	0.0216245	0.286761	0.847785
NEB	0.0229624	0.287076	0.847785
VWF	0.0448994	0.287463	0.847785
MLLT1	0.0432255	0.287544	0.847785
CD74	0.0221333	0.287735	0.847785
CYTH3	0.0453863	0.288841	0.849534
EPS8L2	0.0185069	0.288912	0.849534
RGS8	0.0406384	0.289229	0.84961
NPTN	0.0514227	0.290131	0.850535
HS3ST3B1	-0.0231545	0.29061	0.850535
NUDT15	-0.0319059	0.290615	0.850535
CLSTN2	-0.0235324	0.290711	0.850535
GRK5	0.0314184	0.291199	0.850973
ANXA10	0.0519604	0.291445	0.850973
WDR46	0.0222823	0.293563	0.855605
ITGB1	-0.0133281	0.293619	0.855605
LAMP3	-0.0340679	0.293953	0.855723
SAP18	0.0453597	0.295064	0.85731
DUSP13	-0.0245923	0.295086	0.85731
IL20RA	-0.0280059	0.295495	0.857642
DPY30	0.0375011	0.296186	0.858321
FZD10	0.0368759	0.296318	0.858321
CXADR	0.0329217	0.296949	0.859054
VTA1	-0.0445418	0.297232	0.859054
EDEM2	0.0229223	0.297455	0.859054
ICAM1	0.0179113	0.297842	0.859318
SAT2	0.0406298	0.29831	0.859817
GFRA2	-0.0127167	0.2987	0.860092
AMBN	-0.0171478	0.301087	0.866107
NFKB2	0.0334819	0.301888	0.866596
CD276	-0.0216545	0.302293	0.866596
ALDH1A1	0.0335087	0.302386	0.866596
NDRG1	-0.0418506	0.302446	0.866596
PLAU	-0.0176926	0.302838	0.866867
RBFOX3	0.0228303	0.303936	0.869155
TDRKH	0.0514869	0.305699	0.873154
TFRC	0.0226691	0.305933	0.873154
UBE2Z	0.035686	0.306827	0.874651
CDON	0.0152435	0.307058	0.874651
CNP	-0.0485399	0.307489	0.875024
COL2A1	-0.0488172	0.308729	0.876143
THOP1	0.018679	0.308746	0.876143
PXDNL	0.0329868	0.308785	0.876143
ITGA5	0.0151251	0.30964	0.877715
MN1	0.0339967	0.310026	0.877956
RBM19	-0.0283496	0.310714	0.879049
SIL1	-0.0190517	0.311636	0.880801
GASK1A	0.0263939	0.313074	0.883699
CST6	-0.0281185	0.313645	0.883699
IGFBP7	-0.0168584	0.31402	0.883699
KIAA1549	0.0420989	0.314343	0.883699
GBP6	-0.0272111	0.314869	0.883699
FBN2	0.0348705	0.314986	0.883699
CARHSP1	-0.0319659	0.315362	0.883699
CRISP2	-0.0370592	0.315371	0.883699
SMARCA2	-0.0418938	0.31539	0.883699
MST1	0.0372202	0.3159	0.883976
FCRLB	0.0352051	0.316583	0.883976
WFIKKN1	0.0241386	0.316627	0.883976
DBH	-0.0613524	0.316808	0.883976
HHEX	0.0444869	0.317006	0.883976
FAM3B	-0.020469	0.318591	0.887546
GSTT2B	0.13779	0.318951	0.887701
LBR	0.0399095	0.319621	0.888006
MRPL24	0.0222351	0.31967	0.888006
RELB	-0.0300235	0.320214	0.888671
IL17D	-0.0192131	0.321103	0.889544
CDH22	-0.0167976	0.321347	0.889544
ADA2	-0.02437	0.321581	0.889544
GATA3	0.0155267	0.322361	0.889544
SAFB2	0.0162989	0.32257	0.889544
PPIF	0.0363167	0.322642	0.889544
APOA4	-0.0202251	0.322666	0.889544
ISM1	0.0222149	0.323661	0.890734
FKBP5	-0.0547087	0.323709	0.890734
EHD3	-0.0676038	0.324746	0.891052
RLN1	0.0276544	0.324915	0.891052
SELENOP	0.0125763	0.325186	0.891052
DNAJB8	0.0338341	0.325387	0.891052
IL1R2	0.0109974	0.325729	0.891052
CDHR2	0.0476348	0.325905	0.891052
VIT	0.0211996	0.326495	0.891052
SUSD1	0.0280408	0.326673	0.891052
ACOX1	0.0283611	0.327062	0.891052
IL10	-0.0496431	0.327242	0.891052
CR1	0.0204376	0.327462	0.891052
FNDC1	-0.0265114	0.327494	0.891052
HAGH	-0.0436474	0.328901	0.892164
SCPEP1	0.0282321	0.328962	0.892164
INSR	0.00952265	0.329315	0.892164
LXN	-0.0380369	0.330155	0.892164
CRH	-0.0495012	0.330517	0.892164
CTSF	-0.0225745	0.330741	0.892164
SERPINB5	0.0277748	0.330843	0.892164
EGFL7	0.0233453	0.331064	0.892164
SDCCAG8	-0.0655592	0.331116	0.892164
STAU1	0.0377993	0.331179	0.892164
SERPINA4	0.0133406	0.331599	0.892164
APOE	-0.0406003	0.331716	0.892164
S100P	-0.0307323	0.331882	0.892164
MYOM2	-0.0261274	0.332523	0.893061
CLSTN3	0.0168722	0.333802	0.894774
BOC	-0.0132495	0.333881	0.894774
PILRB	-0.0327	0.334517	0.894774
BST2	0.0303911	0.334572	0.894774
LY96	0.0196667	0.334753	0.894774
BTN3A2	-0.0216262	0.33518	0.894774
NFASC	0.0150258	0.33531	0.894774
PRDX2	-0.0366629	0.335719	0.895045
CA8	0.0152018	0.336431	0.896125
NOTCH1	-0.00865092	0.336967	0.896732
NTF3	0.0203867	0.33772	0.896879
LILRB2	0.0195791	0.338456	0.896879
RELT	-0.015854	0.338995	0.896879
IVD	0.0273275	0.33925	0.896879
PPP1R14D	-0.0211053	0.339267	0.896879
SHPK	0.0227388	0.339324	0.896879
IL1RL1	-0.0250471	0.33948	0.896879
GABARAP	0.0272501	0.339978	0.896879
MFAP5	0.0239264	0.341074	0.896879
PNPT1	0.066351	0.341294	0.896879
ARID4B	-0.0241779	0.341532	0.896879
LGALS9	0.0196736	0.341936	0.896879
PAIP2B	0.0288112	0.34205	0.896879
PSCA	-0.145216	0.342062	0.896879
DTX2	-0.0356097	0.342581	0.896879
APOC1	-0.0195356	0.342759	0.896879
PKD2	-0.032989	0.342815	0.896879
EPHA1	0.0198987	0.343083	0.896879
CD22	0.0229435	0.343107	0.896879
SNX5	0.0168769	0.343908	0.896879
ALPI	-0.0674965	0.344163	0.896879
IL2RB	0.021928	0.344261	0.896879
IL21R	0.0305154	0.344944	0.896879
NLGN1	0.0380986	0.345157	0.896879
DSC2	-0.0187319	0.345481	0.896879
SEPTIN8	-0.0180315	0.34551	0.896879
PSMC3	0.0169424	0.345615	0.896879
DNLZ	0.0519552	0.34564	0.896879
RILPL2	-0.0536891	0.346727	0.89739
PPP1R9B	0.053104	0.347574	0.89739
L1CAM	0.0155865	0.347859	0.89739
MET	-0.0112602	0.348061	0.89739
MICALL2	-0.0379738	0.348495	0.89739
OLR1	-0.032605	0.348658	0.89739
REG4	-0.0266487	0.349139	0.89739
MAG	-0.0254765	0.34915	0.89739
ESYT2	0.044811	0.349201	0.89739
IFNGR1	-0.01117	0.350281	0.89739
GLP1R	0.0208694	0.350421	0.89739
DPT	0.0143491	0.350489	0.89739
SPP1	-0.0249224	0.351275	0.89739
DEFB104A_DEFB104B	0.0301548	0.351623	0.89739
ACSL1	0.0213119	0.351828	0.89739
CREBZF	0.0139594	0.351966	0.89739
IFT20	0.0236878	0.352165	0.89739
SLC9A3R2	0.0277305	0.352178	0.89739
CLSTN1	0.0292964	0.352632	0.89739
PRKRA	0.0368388	0.352734	0.89739
P4HB	0.0211214	0.353588	0.89739
RECK	-0.0108161	0.353814	0.89739
SNX9	-0.03771	0.353936	0.89739
LTA4H	-0.0315557	0.354204	0.89739
CCL28	-0.0317007	0.354224	0.89739
HTR1A	-0.0427093	0.354676	0.89739
LGALS7_LGALS7B	-0.0219422	0.354884	0.89739
TOMM20	0.0423809	0.35499	0.89739
BTC	0.0403083	0.355054	0.89739
PCSK7	0.0240356	0.355144	0.89739
DLGAP5	0.0287321	0.356011	0.89739
YTHDF3	0.0463479	0.356177	0.89739
ATP5IF1	0.06057	0.356216	0.89739
CEACAM19	0.0212957	0.356308	0.89739
BLOC1S3	0.0216475	0.356918	0.897718
FABP1	0.052094	0.357054	0.897718
ANGPTL3	-0.0190887	0.357512	0.897972
LARP1	0.0339727	0.357771	0.897972
PLXDC1	0.0180364	0.358361	0.898678
NPPB	0.0689003	0.359168	0.899175
MCEE	-0.0229453	0.359176	0.899175
GH2	0.0919916	0.360861	0.902617
IGHMBP2	0.0299582	0.362085	0.904903
OPHN1	-0.057823	0.362985	0.906374
VEGFA	0.0319322	0.36442	0.906594
STX1B	0.0228879	0.364437	0.906594
CRYM	0.0406479	0.364541	0.906594
RCOR1	0.023611	0.364598	0.906594
APRT	-0.0257616	0.364629	0.906594
ILKAP	-0.0309135	0.365098	0.906987
ADAM15	-0.0160293	0.366001	0.908455
PDGFRA	-0.0149427	0.368162	0.913043
PGF	-0.0130915	0.368481	0.913057
APOH	-0.0185116	0.369071	0.91374
UBAC1	-0.019163	0.369695	0.913958
LAMA1	0.029159	0.370211	0.913958
MRPL28	-0.0196609	0.370281	0.913958
PPP1R12A	0.0508902	0.370413	0.913958
DYNLT1	0.0431263	0.370733	0.913972
AMN	0.0250623	0.37184	0.914672
RBP7	-0.0314484	0.371982	0.914672
PILRA	-0.0222936	0.372548	0.914672
TIE1	-0.0215441	0.372614	0.914672
TYRO3	0.0146002	0.372678	0.914672
LRTM2	0.0147421	0.37352	0.914672
ENAH	-0.0252646	0.374081	0.914672
SLC28A1	0.0310278	0.374495	0.914672
TNPO1	0.0179693	0.375294	0.914672
PHYKPL	0.0212449	0.375849	0.914672
BTNL10	-0.0215434	0.375904	0.914672
LRP1	-0.0135799	0.376431	0.914672
TGFA	-0.0247692	0.376603	0.914672
PDIA5	-0.0308535	0.376646	0.914672
REST	0.0182657	0.376696	0.914672
ITPR1	-0.0366283	0.376711	0.914672
PALLD	0.0207988	0.376805	0.914672
PAGR1	-0.0231907	0.376878	0.914672
VASN	0.0141689	0.37698	0.914672
ERCC1	0.0173507	0.37762	0.914752
CST5	-0.0290323	0.377641	0.914752
VEGFC	-0.0287879	0.378318	0.915258
PTPRS	-0.0124165	0.378478	0.915258
HNRNPK	0.040023	0.379346	0.916588
SHH	0.0223086	0.379917	0.916588
WASF1	0.0481113	0.379986	0.916588
FGFBP1	-0.0160201	0.380286	0.916588
GLI2	0.0170662	0.381059	0.917691
BST1	-0.0241263	0.381524	0.917937
HEPH	0.0127638	0.382258	0.917937
CBLIF	-0.0381398	0.382279	0.917937
SPARCL1	0.0140876	0.382421	0.917937
FRZB	-0.0131062	0.38378	0.919231
CLEC4C	-0.0234787	0.384205	0.919231
CXCL1	0.0510758	0.384447	0.919231
F11R	0.0288838	0.384512	0.919231
VASH1	0.0417296	0.384621	0.919231
SUGT1	-0.0416121	0.385338	0.919231
ST8SIA1	0.0242587	0.386269	0.919231
CNTF	0.0169597	0.386355	0.919231
C9ORF40	-0.0429288	0.386362	0.919231
C5	0.0076083	0.386437	0.919231
NIT2	0.0375933	0.386882	0.919231
THTPA	-0.0442435	0.38739	0.919231
SCGB2A2	-0.0160211	0.388097	0.919231
GOLGA3	-0.0396891	0.388244	0.919231
GET3	0.0276203	0.388334	0.919231
SYTL4	0.0370773	0.388807	0.919231
TMOD4	-0.0206092	0.388952	0.919231
COMMD9	0.0196357	0.38906	0.919231
EPGN	-0.02363	0.389083	0.919231
ZBTB16	0.0360049	0.389269	0.919231
PTPRM	-0.0122489	0.390579	0.921021
MORN4	0.0398756	0.390667	0.921021
PRCP	0.0157385	0.390976	0.921021
CXCL5	0.0586059	0.393601	0.924311
SLC39A14	0.0168536	0.393679	0.924311
IL20RB	0.0208627	0.394035	0.924311
RLN2	0.0236062	0.394165	0.924311
SCARF2	-0.0146032	0.39425	0.924311
NPHS2	0.0524751	0.394275	0.924311
HCG22	-0.0259221	0.394771	0.924729
XCL1	-0.0276597	0.395767	0.926273
KEL	0.0180135	0.396874	0.926273
CETN3	0.0376011	0.396939	0.926273
SMAD1	0.0405325	0.397198	0.926273
HSD17B3	0.024361	0.397325	0.926273
RRM2	0.0260112	0.397337	0.926273
ARL13B	0.0350196	0.398103	0.927315
GAMT	-0.0192338	0.399592	0.928215
CRYBB1	-0.0316432	0.399703	0.928215
REXO2	0.0247715	0.399961	0.928215
SEPTIN7	-0.0269205	0.400138	0.928215
UBQLN3	-0.022054	0.400337	0.928215
AZU1	-0.0395807	0.400519	0.928215
TREM2	0.0253295	0.401212	0.928215
WASF3	0.0415446	0.401234	0.928215
GSTM4	0.0346721	0.401356	0.928215
ACTN4	-0.0160471	0.402426	0.929688
GNLY	0.0252025	0.403709	0.929688
CSNK1D	0.0309467	0.403763	0.929688
AMY2A	-0.0242565	0.403983	0.929688
CD38	-0.0151901	0.404015	0.929688
MINDY1	-0.0530844	0.404142	0.929688
GM2A	-0.0198297	0.404226	0.929688
CCL11	-0.018003	0.405194	0.931179
CORO1A	-0.0451642	0.405622	0.931222
ANP32C	-0.0200393	0.406388	0.931222
GRIN2B	0.0280303	0.406889	0.931222
AAMDC	-0.0260387	0.406962	0.931222
BCL2L11	-0.0214653	0.407204	0.931222
LRP11	0.0176475	0.407438	0.931222
MCFD2	-0.0209939	0.407449	0.931222
KITLG	-0.0173517	0.409486	0.934654
BSG	-0.0100309	0.409593	0.934654
SEMA6C	0.01273	0.410608	0.935516
IL18BP	-0.0149688	0.410612	0.935516
RNF41	0.0328889	0.411387	0.936015
CCAR2	0.0266341	0.411474	0.936015
SH3BP1	-0.0229774	0.412983	0.936287
PTEN	0.0145702	0.413002	0.936287
FH	-0.0399752	0.413078	0.936287
SEZ6	0.0146926	0.413129	0.936287
HSPB1	0.0325546	0.413611	0.936287
TRIM5	0.0412553	0.413619	0.936287
FXN	0.035475	0.413843	0.936287
IGFL4	0.0357524	0.414598	0.937268
BAMBI	0.0141448	0.415483	0.938542
HRAS	0.0481822	0.417057	0.940357
NID2	0.0353887	0.417398	0.940357
RRM2B	0.0321811	0.417627	0.940357
SNU13	-0.0304828	0.417793	0.940357
CD300LF	-0.0295017	0.417932	0.940357
LMNB1	-0.0284122	0.418223	0.940357
GRP	-0.0258251	0.418898	0.941147
ING1	0.0217923	0.420471	0.943954
TIA1	0.0565095	0.421103	0.944148
ITGAV	0.00763095	0.421205	0.944148
PIKFYVE	0.0261937	0.421761	0.944668
IFNG	0.0537221	0.422581	0.945477
FCER1A	-0.0111314	0.422772	0.945477
MMP9	-0.0285605	0.424016	0.94713
KIR3DL1	0.058399	0.424389	0.94713
DPEP1	0.0240224	0.424486	0.94713
CDNF	-0.01494	0.424934	0.947405
APP	-0.0310585	0.425597	0.948157
NPTXR	0.0160696	0.426611	0.949031
FNTA	0.0161935	0.426641	0.949031
CXCL6	0.0357923	0.427754	0.950783
TXLNA	0.0412685	0.429066	0.95244
TCN1	0.0156282	0.429154	0.95244
SNX15	-0.0255863	0.429515	0.952497
MILR1	-0.0235561	0.429833	0.952497
NOS1	-0.0226852	0.43019	0.952564
CD3D	-0.0157601	0.430856	0.953314
TPR	-0.0224789	0.432339	0.955088
OSCAR	-0.0155823	0.432614	0.955088
PGM2	-0.0271804	0.432671	0.955088
ASS1	0.0362197	0.433275	0.955088
EFNA1	-0.0128871	0.433302	0.955088
PODXL	0.00693574	0.433733	0.955088
MYCBP2	-0.0306165	0.433952	0.955088
HPGDS	-0.0172619	0.434431	0.95542
SLIRP	0.0260109	0.434992	0.95565
TXNDC15	-0.0123454	0.435782	0.95565
ATRAID	-0.0138094	0.43589	0.95565
FGF16	0.0214484	0.43617	0.95565
FCGR2A	0.0280992	0.436708	0.95565
MSLNL	0.0173815	0.438017	0.95565
PI16	-0.0112405	0.438107	0.95565
LCP1	-0.02153	0.438244	0.95565
DDX53	0.0160192	0.438364	0.95565
CC2D1A	0.0342071	0.438454	0.95565
CCL4	-0.0319983	0.438931	0.95565
STX3	0.0174396	0.43894	0.95565
KLK12	0.0640809	0.439331	0.95565
VNN2	-0.0208066	0.439936	0.95565
TIMP1	-0.0132639	0.440187	0.95565
GAD2	0.0218869	0.440207	0.95565
SORT1	0.0162644	0.440244	0.95565
GLYR1	0.0269606	0.440731	0.95565
NT5C3A	-0.0400501	0.440767	0.95565
CD48	-0.0132731	0.441995	0.957091
CDC26	-0.0315224	0.442558	0.957091
SCIN	0.0325737	0.442659	0.957091
MAD1L1	0.0220889	0.443332	0.957091
ADGRE1	0.0251087	0.44338	0.957091
CCL22	0.0242285	0.443402	0.957091
IL25	-0.0156356	0.443792	0.957224
UNG	-0.0150617	0.444926	0.958961
CCER2	-0.0278108	0.445456	0.959171
LETM1	0.0236537	0.445682	0.959171
COL18A1	0.010669	0.446407	0.959985
ERMAP	0.0201613	0.446998	0.959985
SLAMF8	-0.023955	0.447049	0.959985
TSC22D1	0.0296212	0.447654	0.960576
COQ7	0.0201868	0.449269	0.963333
SPINT1	-0.0107846	0.449803	0.963431
MMUT	-0.021587	0.449976	0.963431
RNASEH2A	0.0215957	0.450363	0.963553
CETN2	0.0297332	0.45117	0.96457
SHBG	-0.0246682	0.451588	0.964755
LRRC25	0.0173362	0.452027	0.964986
PRKAG3	0.0140822	0.452815	0.96542
PACS2	0.0276326	0.453005	0.96542
TSLP	-0.026591	0.453261	0.96542
TGFBR1	-0.00961792	0.453709	0.96542
MEPE	-0.0116089	0.454184	0.96542
CD200R1	0.0151232	0.454218	0.96542
MRPL46	-0.0123149	0.454638	0.965503
CGN	0.0182828	0.455352	0.965503
CCN4	0.0180093	0.455563	0.965503
IFNW1	0.0159726	0.455582	0.965503
MAPRE3	0.0636846	0.456248	0.965908
AKR1B10	0.0262634	0.456436	0.965908
APOA1	0.0117693	0.457421	0.966205
EVPL	0.0147649	0.457711	0.966205
LUZP2	0.0192521	0.45773	0.966205
CST3	0.013084	0.457996	0.966205
CASP8	-0.027246	0.458273	0.966205
IL31RA	0.0175498	0.458566	0.966205
MDGA1	-0.0296221	0.458966	0.966217
IL11	-0.0277579	0.459235	0.966217
COL1A1	-0.0109909	0.460058	0.967251
MMP8	-0.0321594	0.460499	0.96748
HYAL1	0.00975454	0.461623	0.969143
CNPY2	0.025912	0.462637	0.970449
RPS10	-0.0179256	0.463617	0.970449
EDIL3	-0.0153303	0.463644	0.970449
TRAF3	-0.0160358	0.463922	0.970449
ITIH4	0.0113622	0.4641	0.970449
OLFM4	-0.0522836	0.464573	0.970449
CD300C	0.0149913	0.46485	0.970449
DNAJC9	-0.0333893	0.465117	0.970449
ITIH5	0.0190386	0.465243	0.970449
LHPP	-0.0258919	0.465931	0.970633
TMPRSS11B	-0.0331419	0.465997	0.970633
DNER	-0.0109799	0.466368	0.970712
AMDHD2	0.010713	0.466785	0.970788
TSHB	-0.0370391	0.467216	0.970788
RNF43	0.0251515	0.467764	0.970788
CEP152	-0.0178023	0.468174	0.970788
GOT1	-0.0170429	0.468179	0.970788
AKAP12	-0.00941814	0.468404	0.970788
STX5	0.0175966	0.468859	0.970855
EBAG9	0.0400228	0.470158	0.970855
LATS1	0.0355537	0.470218	0.970855
NUDT5	0.021899	0.47034	0.970855
PRELP	-0.00997998	0.470729	0.970855
IMPA1	-0.0254732	0.47077	0.970855
FCGR3B	0.0214073	0.471412	0.970855
PNLIPRP2	0.124109	0.472121	0.970855
VSTM1	-0.0206243	0.472609	0.970855
GBP1	-0.0279448	0.47274	0.970855
BTLA	-0.0375069	0.472775	0.970855
CNDP1	0.0191238	0.472928	0.970855
ECM1	0.0153622	0.473166	0.970855
INSL3	0.0248144	0.473757	0.970855
PDCL2	-0.0228694	0.474466	0.970855
IL18RAP	-0.0730295	0.474773	0.970855
MFAP4	0.0131054	0.474978	0.970855
PEAR1	0.00924522	0.47505	0.970855
PLXNB3	0.0195506	0.475432	0.970855
GNPDA1	-0.0134754	0.475511	0.970855
FLRT2	-0.0115499	0.475532	0.970855
SCN3A	-0.0154265	0.476018	0.970855
B3GNT7	-0.0148463	0.47667	0.970855
COX6B1	0.0135232	0.476699	0.970855
PDGFB	-0.0359905	0.476765	0.970855
LRRC59	0.0198881	0.478155	0.972439
UROD	-0.0294721	0.478512	0.972439
CD164L2	0.0150797	0.478927	0.972439
EIF4E	-0.0378787	0.479475	0.972439
AIF1L	-0.0235682	0.479661	0.972439
DMD	-0.021404	0.479887	0.972439
MOCS2	0.0275473	0.479945	0.972439
STX6	0.0284359	0.480212	0.972439
CCDC50	0.031907	0.481478	0.973471
MTR	0.0270356	0.481754	0.973471
RASGRF1	-0.0179323	0.481908	0.973471
PTGES2	0.0224979	0.482273	0.973471
ARNT	0.0157445	0.48261	0.973471
FLT3	0.0127926	0.483053	0.973471
FN1	0.0107922	0.483061	0.973471
MCEMP1	0.0377718	0.483511	0.973539
STK4	-0.035449	0.483762	0.973539
PDRG1	0.0216598	0.484307	0.973963
TBC1D5	-0.0332786	0.48517	0.974444
ACADSB	0.0363365	0.485216	0.974444
RANBP2	0.0135002	0.486453	0.976257
NXPH1	-0.0155039	0.487256	0.976634
HSPA1A	0.0296514	0.488139	0.976634
TNFRSF9	-0.01661	0.488212	0.976634
CCL13	-0.0277903	0.489574	0.976634
CXCL13	-0.0239816	0.490809	0.976634
CAPS	0.038889	0.491329	0.976634
SERPINA6	0.0064571	0.491332	0.976634
RCC1	0.0207424	0.491732	0.976634
SLC51B	0.0320511	0.491831	0.976634
CD69	0.0356757	0.492412	0.976634
SPINK1	-0.0168009	0.493129	0.976634
PDCD1LG2	-0.0124227	0.49377	0.976634
ROBO2	0.00902924	0.493779	0.976634
FKBP4	-0.0179169	0.493939	0.976634
CDK1	-0.0147432	0.494344	0.976634
PNMA2	-0.0172323	0.495	0.976634
TXK	0.0309959	0.496094	0.976634
SIGLEC9	0.0116339	0.4965	0.976634
SPON2	-0.0140968	0.496599	0.976634
TANK	0.0279428	0.496804	0.976634
PDXDC1	0.0238193	0.496834	0.976634
SLITRK6	-0.0134787	0.497463	0.976634
CD83	-0.0137573	0.497984	0.976634
CPXM1	-0.0276952	0.498121	0.976634
DDI2	-0.032299	0.4982	0.976634
WFDC1	-0.0219107	0.498306	0.976634
LRG1	-0.0102796	0.49833	0.976634
SAMD9L	-0.0291107	0.498711	0.976634
PADI4	0.0291623	0.498771	0.976634
PRND	-0.0209821	0.499405	0.976634
CTRL	-0.026633	0.499474	0.976634
FMNL1	0.0253431	0.499632	0.976634
SEC31A	0.0304017	0.500021	0.976634
PSMD9	-0.0227229	0.500111	0.976634
LRCH4	0.027436	0.500209	0.976634
DNAJC6	-0.0337193	0.500312	0.976634
CEACAM8	-0.0198013	0.500364	0.976634
EDF1	0.0275121	0.500388	0.976634
MDM1	-0.0121383	0.500631	0.976634
UBE2L6	-0.0241569	0.50085	0.976634
MIA	-0.014457	0.500923	0.976634
TG	0.0468711	0.501369	0.976634
SDC1	-0.0152934	0.502006	0.976634
DOCK9	0.0475571	0.502322	0.976634
GLRX	-0.0230555	0.502505	0.976634
HK2	0.0110714	0.502551	0.976634
SEL1L	-0.0127912	0.503199	0.976634
TNFSF12	-0.0110526	0.503224	0.976634
DNAJA4	-0.0288522	0.50359	0.976634
EXTL1	-0.0184195	0.503736	0.976634
ENTPD2	0.0172928	0.50375	0.976634
CD59	-0.00926309	0.504123	0.976634
PAXX	0.0180112	0.505773	0.976634
LTBP3	0.0210286	0.505993	0.976634
EP300	0.0117855	0.50663	0.976634
SPACA5_SPACA5B	0.0109335	0.506645	0.976634
PTPN6	-0.0348685	0.506701	0.976634
HADH	-0.0253389	0.506808	0.976634
MB	-0.019224	0.507089	0.976634
MTDH	0.0356121	0.507109	0.976634
TDGF1	0.0566676	0.507111	0.976634
TRIM26	0.0219578	0.507421	0.976634
CLPP	0.0367737	0.508147	0.977174
GRIK2	0.0161245	0.508382	0.977174
NDUFA5	0.013738	0.509115	0.977174
PDZD2	-0.02355	0.50993	0.977174
TAB2	-0.0416229	0.510034	0.977174
CERT	0.0238101	0.510197	0.977174
FKBPL	0.0226262	0.510294	0.977174
ACADM	-0.027617	0.510736	0.977174
IDI2	-0.0179425	0.510736	0.977174
REG1B	-0.0214971	0.511458	0.977174
CEP170	-0.0299417	0.511814	0.977174
LAMTOR5	0.0157703	0.512413	0.977174
S100A4	0.0219628	0.512945	0.977174
SH2D1A	0.0214684	0.512968	0.977174
FCAR	-0.0184779	0.513055	0.977174
PBXIP1	0.0115278	0.513103	0.977174
MTSS1	0.0426544	0.513877	0.977174
QSOX1	0.0163861	0.514177	0.977174
TNFRSF13C	0.0161664	0.514713	0.977174
TNFRSF12A	0.0132366	0.515061	0.977174
IL2	0.0119787	0.515296	0.977174
RARRES1	-0.0130265	0.515537	0.977174
KLK3	-0.0217319	0.515602	0.977174
CCL7	0.0236631	0.51575	0.977174
GSTP1	-0.0265205	0.516561	0.977986
CD109	-0.0123537	0.516849	0.977986
CASP4	0.064566	0.517382	0.978359
GADD45GIP1	0.0202272	0.517741	0.978404
LILRA5	0.0126386	0.519456	0.979535
ATP6V1G1	0.0275244	0.519851	0.979535
CLASP1	0.0269224	0.519961	0.979535
CMC1	0.0341621	0.520154	0.979535
IL12A_IL12B	-0.0306405	0.520154	0.979535
TREML2	-0.012633	0.520733	0.979535
HIF1A	0.0253359	0.520762	0.979535
CSF1	0.01052	0.522106	0.979535
PRSS53	0.0139416	0.522122	0.979535
DNPEP	-0.0215285	0.522533	0.979535
LAMB1	0.0110116	0.522704	0.979535
METAP1D	0.0309421	0.522709	0.979535
LILRA6	0.0272308	0.52271	0.979535
ATP1B1	0.0181138	0.523415	0.979543
GSAP	-0.0323826	0.523686	0.979543
CRYZL1	-0.0348909	0.523723	0.979543
IMPG1	-0.0110375	0.524356	0.980098
GNAS	-0.0325748	0.524827	0.980349
LTA	-0.0151048	0.5256	0.981165
GGA1	0.0252271	0.526018	0.981317
NMNAT1	0.0271683	0.527013	0.981475
CHRM1	0.0137184	0.527374	0.981475
LILRA3	0.0507702	0.528277	0.981475
CD160	0.017284	0.528821	0.981475
CTSO	0.0112147	0.528836	0.981475
IL34	0.0132812	0.529545	0.981475
MYDGF	0.0367726	0.530034	0.981475
CASP10	-0.02632	0.53033	0.981475
CEP164	-0.0237289	0.530409	0.981475
LIFR	-0.00867457	0.530536	0.981475
CPA2	0.0234957	0.530789	0.981475
IGF2R	0.00829235	0.531319	0.981475
ACTN2	-0.0201522	0.531329	0.981475
PENK	-0.0113746	0.53165	0.981475
CDH4	0.017627	0.531953	0.981475
TNFRSF11A	0.0147865	0.532223	0.981475
PPP1R14A	0.0281837	0.533208	0.981475
TTR	0.00909311	0.533305	0.981475
ADAM22	-0.0126877	0.533471	0.981475
LMNB2	0.0105055	0.534158	0.981475
XRCC4	0.0137447	0.534303	0.981475
ANXA5	0.01099	0.534379	0.981475
SCARB2	0.0117016	0.534866	0.981475
IL12RB2	0.0150071	0.535615	0.981475
PF4	-0.0350912	0.535649	0.981475
CRTAP	0.0180418	0.535777	0.981475
OPLAH	0.024945	0.536231	0.981475
FAM3D	0.0294516	0.536251	0.981475
RAB3GAP1	0.0200668	0.536363	0.981475
ART5	-0.0233568	0.536429	0.981475
DDR1	0.00789163	0.536544	0.981475
PSAP	-0.0104163	0.53708	0.981838
XIAP	0.0207843	0.538075	0.981838
TNFAIP2	-0.0165785	0.538079	0.981838
PGLYRP2	0.0108102	0.53809	0.981838
CIT	-0.0167281	0.539666	0.98353
TADA3	0.0139129	0.539693	0.98353
CAMLG	0.0193116	0.540675	0.983609
GIP	-0.0203797	0.540979	0.983609
ANKRD54	-0.0210514	0.541528	0.983609
F12	0.0149026	0.541931	0.983609
PLEKHO1	0.0248966	0.542098	0.983609
BLNK	-0.0136173	0.542292	0.983609
AOC1	-0.0207221	0.542852	0.983609
CDSN	-0.0154502	0.542988	0.983609
CYB5A	0.0252842	0.543347	0.983609
IGSF8	0.0105836	0.543357	0.983609
CD99	-0.00687949	0.543698	0.983609
F13B	0.0088822	0.543787	0.983609
TMED8	-0.036522	0.544294	0.983765
IPCEF1	0.0314693	0.54526	0.983765
ANXA11	-0.0240851	0.545335	0.983765
CEMIP2	0.0123896	0.545339	0.983765
PIK3IP1	-0.00948638	0.545687	0.983765
GBA	0.0187971	0.545898	0.983765
CEP350	0.0134779	0.546847	0.984222
TLR4	-0.0101192	0.547243	0.984222
DHODH	-0.0169973	0.5477	0.984222
VAV3	-0.0353026	0.548188	0.984222
GNE	0.0232606	0.548351	0.984222
NFAT5	-0.0309803	0.54845	0.984222
EFNB2	-0.0203738	0.548734	0.984222
CTRB1	-0.0186648	0.548854	0.984222
MED21	0.0175426	0.550144	0.985439
EREG	0.0276269	0.550209	0.985439
FHIP2A	-0.0171625	0.550568	0.985476
NGF	-0.00417505	0.551267	0.98563
KIRREL2	-0.0137456	0.551875	0.98563
PMVK	-0.0386619	0.551985	0.98563
KRT5	0.0168283	0.554065	0.98563
LTO1	0.0146638	0.554703	0.98563
XG	0.0107527	0.555048	0.98563
PPM1F	-0.0179104	0.555234	0.98563
PPCDC	-0.0165816	0.555758	0.98563
TMPRSS5	-0.0132916	0.556963	0.98563
ENPEP	-0.0152753	0.557	0.98563
ELAVL4	0.0298048	0.557217	0.98563
SCN2B	0.0101292	0.557278	0.98563
AMFR	0.0223843	0.557586	0.98563
SFTPA2	-0.0181713	0.557767	0.98563
TRIAP1	0.0217772	0.558576	0.98563
ALDH5A1	0.0161997	0.558836	0.98563
CA2	-0.0250623	0.559009	0.98563
GIPC3	-0.0335395	0.559039	0.98563
CEP85	0.0221677	0.55917	0.98563
SMAD2	0.0232674	0.559512	0.98563
AHCY	0.0236833	0.559619	0.98563
GALNT3	0.0142728	0.559626	0.98563
NME1	0.00737063	0.559689	0.98563
GP1BB	-0.023045	0.56009	0.98563
CIAPIN1	-0.0219568	0.560377	0.98563
TNFRSF13B	0.0115334	0.560527	0.98563
VIM	-0.0396143	0.561142	0.98563
CEACAM20	0.0149993	0.561225	0.98563
MINK1	-0.0317551	0.56141	0.98563
FCRL3	-0.0191003	0.561529	0.98563
STOML2	0.030785	0.561975	0.98563
MYO6	-0.0122716	0.562014	0.98563
DPP4	-0.00943522	0.562438	0.98563
CHMP6	0.0186255	0.562658	0.98563
CHM	0.0205112	0.562863	0.98563
COCH	-0.0156736	0.562875	0.98563
M6PR	0.0138979	0.563756	0.98563
EFCAB2	0.0117657	0.563918	0.98563
MAPK13	0.0144124	0.564361	0.98563
HTR1B	0.0148625	0.56549	0.98563
LCN15	0.0206499	0.565716	0.98563
TST	0.0254149	0.565908	0.98563
NCR3LG1	-0.0108693	0.567693	0.98563
NCK2	0.0354591	0.568095	0.98563
RNF5	-0.0244922	0.568186	0.98563
GRAP2	0.0425948	0.569353	0.98563
TARS1	0.0121684	0.569927	0.98563
VIPR1	0.00845	0.570164	0.98563
DNAJA2	0.0276775	0.571133	0.98563
PCDH17	0.0115184	0.571145	0.98563
TINAGL1	0.00727087	0.571218	0.98563
ADGRE2	-0.00923344	0.572286	0.98563
CASP3	-0.0291078	0.572326	0.98563
CASP2	-0.022616	0.572349	0.98563
IST1	-0.0330267	0.572505	0.98563
BLMH	-0.0107692	0.57303	0.98563
DARS1	-0.0243612	0.573188	0.98563
LRFN2	0.016037	0.57325	0.98563
TNFRSF6B	0.0185474	0.573495	0.98563
GFRAL	0.0207482	0.573788	0.98563
SELL	0.00741318	0.574387	0.98563
YOD1	0.0215066	0.574533	0.98563
ATP2B4	-0.0206192	0.574783	0.98563
SARG	0.03555	0.575898	0.98563
SCAMP3	0.0285917	0.576582	0.98563
TERF1	0.00990741	0.576748	0.98563
GTF2IRD1	0.0235989	0.577126	0.98563
NUDT16	-0.0283431	0.577153	0.98563
PRR4	-0.0227971	0.577309	0.98563
CALCA	0.017782	0.577337	0.98563
PTK7	-0.0122462	0.577859	0.98563
EPHB6	-0.0101972	0.578379	0.98563
TNFRSF14	-0.00998848	0.578491	0.98563
CRTAM	-0.0162376	0.578627	0.98563
IL12RB1	-0.0125823	0.579344	0.98563
PRTFDC1	0.0365514	0.579731	0.98563
CDKN2D	-0.0305307	0.580027	0.98563
F11	0.00979853	0.580434	0.98563
BOLA2_BOLA2B	-0.018402	0.581081	0.98563
PDE1C	0.0180993	0.581249	0.98563
SORCS2	-0.0115179	0.581774	0.98563
LECT2	-0.0209825	0.582156	0.98563
IL1B	-0.0182863	0.583579	0.98563
TNFSF11	0.0196135	0.584028	0.98563
IL2RG	-0.0120916	0.584231	0.98563
KCNH2	-0.0238107	0.584484	0.98563
FUT8	0.018361	0.584738	0.98563
DLK1	-0.0163532	0.584996	0.98563
QPCT	0.00873787	0.585211	0.98563
NFX1	-0.0218984	0.585248	0.98563
SLA2	-0.0327901	0.585613	0.98563
SNAP29	0.0290835	0.585756	0.98563
CD86	0.00884951	0.586098	0.98563
NFIC	-0.0138614	0.586153	0.98563
PFKFB2	-0.0246286	0.586308	0.98563
RNF4	0.0212898	0.588208	0.98563
ATP6V1D	0.0083233	0.588237	0.98563
DLG4	0.0224411	0.588625	0.98563
MFAP3L	-0.0218087	0.589211	0.98563
EIF2S2	0.0133675	0.589565	0.98563
NCS1	-0.00874889	0.590631	0.98563
RILP	-0.0195351	0.591123	0.98563
VSIR	0.0193448	0.591743	0.98563
TBCA	-0.0273458	0.591935	0.98563
FRMD7	0.0102555	0.592086	0.98563
KIF20B	0.0242819	0.592811	0.98563
ADA	-0.0106718	0.59304	0.98563
CAT	-0.0176229	0.593158	0.98563
AREG	0.0133079	0.593202	0.98563
SIGLEC6	-0.0103851	0.593307	0.98563
GLOD4	-0.0115614	0.593408	0.98563
SLMAP	0.0260799	0.593436	0.98563
TIMP3	-0.0419199	0.593526	0.98563
CDKN1A	0.0332048	0.593817	0.98563
DCDC2C	-0.0202169	0.594089	0.98563
INSL5	-0.0293309	0.594298	0.98563
PFDN4	-0.0168925	0.594729	0.98563
NENF	0.0346514	0.595091	0.98563
PDIA4	0.0188857	0.595178	0.98563
PMM2	-0.0187895	0.595679	0.98563
ARHGAP25	-0.0181999	0.595705	0.98563
CD2	0.0120351	0.595751	0.98563
CASQ2	0.0156178	0.595912	0.98563
TPRKB	-0.0193295	0.596452	0.98563
TCP11	-0.0180665	0.59655	0.98563
CBLN1	0.030255	0.597653	0.98563
STC1	0.0132725	0.598051	0.98563
KLK1	-0.0396447	0.598141	0.98563
CNTN3	0.0108828	0.598738	0.98563
GLO1	-0.0183606	0.598775	0.98563
IL10RB	-0.00912859	0.598991	0.98563
IL17RA	-0.0134328	0.59904	0.98563
NFU1	0.0313518	0.599174	0.98563
BACH1	0.0225583	0.59955	0.98563
FGF19	0.0236863	0.599748	0.98563
SULT2A1	0.0164406	0.600096	0.98563
PLPBP	-0.0210872	0.600214	0.98563
ERBB4	0.00762223	0.600535	0.98563
NAAA	0.0176653	0.600631	0.98563
ATP1B4	0.0129367	0.600834	0.98563
TP53BP1	0.0272197	0.601256	0.98563
PEBP1	0.0183241	0.602057	0.98563
CLEC1B	0.0294802	0.602059	0.98563
VSIG2	0.0178772	0.602406	0.98563
HMGCL	0.0153348	0.603137	0.98563
TK1	0.0133994	0.603585	0.98563
RUVBL1	-0.0326054	0.603601	0.98563
CABP2	0.0198519	0.603648	0.98563
CEACAM21	0.0264646	0.603838	0.98563
TSPYL1	0.01235	0.604803	0.98563
ANXA1	-0.0130898	0.605212	0.98563
KIRREL1	-0.0185053	0.605246	0.98563
MFAP3	0.0150193	0.605579	0.98563
RNASE6	-0.00931631	0.605734	0.98563
TMED4	-0.0175841	0.606103	0.98563
NAP1L4	-0.0127153	0.60611	0.98563
LILRA4	0.0155923	0.606178	0.98563
CSNK2A1	-0.0137808	0.606249	0.98563
NUDC	-0.0191018	0.606413	0.98563
CASP9	0.0190948	0.606425	0.98563
ATP5PO	-0.0128079	0.606723	0.98563
SNX2	-0.0238385	0.606747	0.98563
PDE4D	0.0187057	0.60697	0.98563
PTGDS	0.00912447	0.607283	0.98563
RAC3	-0.0213925	0.607761	0.98563
ENO2	0.0196529	0.608128	0.98563
PCARE	0.0260308	0.608211	0.98563
AFP	-0.0203829	0.608407	0.98563
LPO	0.01806	0.608818	0.98563
NEXN	0.0203985	0.609004	0.98563
GP1BA	-0.00973904	0.609417	0.98563
DIABLO	0.0331917	0.610015	0.98563
DNPH1	-0.0161139	0.610206	0.98563
HGFAC	-0.00843563	0.610268	0.98563
TMSB10	-0.0226618	0.610362	0.98563
TSPAN8	-0.0309772	0.610442	0.98563
SELP	0.0171253	0.611235	0.98563
ADAMTS4	-0.0103248	0.611324	0.98563
NEDD9	0.0101359	0.611533	0.98563
S100A3	-0.013737	0.611563	0.98563
STAM	0.0111377	0.612147	0.98563
PDGFRB	-0.0102054	0.612713	0.98563
CD80	0.00984608	0.613045	0.98563
TARBP2	0.0238871	0.613109	0.98563
GCHFR	-0.0149	0.613228	0.98563
TMEM132A	-0.018547	0.613595	0.985676
NT5C	-0.02156	0.614567	0.986082
KLK13	-0.0133025	0.614668	0.986082
ACHE	-0.00938581	0.61492	0.986082
IZUMO1	-0.0140704	0.615201	0.986082
MUCL3	0.0130468	0.615994	0.98681
CDH1	0.0117589	0.616344	0.986827
GRSF1	0.0234679	0.616825	0.987056
CD34	-0.00695078	0.617557	0.987286
AMIGO1	0.0148612	0.617726	0.987286
INHBB	-0.0157222	0.617986	0.987286
SHD	-0.0255166	0.618616	0.987752
USP8	0.0282627	0.619012	0.987842
HSDL2	0.0140916	0.619499	0.988079
CRYBB2	0.0212375	0.619995	0.988205
SLAMF6	0.0109073	0.620598	0.988205
PNMA1	0.0163759	0.62114	0.988205
COPE	0.0137207	0.621487	0.988205
OTUD7B	0.0181803	0.622566	0.988205
ALMS1	0.0122798	0.6234	0.988205
SOD3	0.016552	0.623632	0.988205
TMEM25	-0.01264	0.623798	0.988205
DXO	0.0131297	0.624269	0.988205
FAM172A	-0.0177147	0.624744	0.988205
RAB10	0.0153775	0.624889	0.988205
JPT2	-0.024797	0.624894	0.988205
ARHGEF5	0.0210826	0.624923	0.988205
PRSS22	-0.0101027	0.624967	0.988205
BNIP2	0.00976666	0.624981	0.988205
CDH15	0.0127419	0.625488	0.988205
BTN1A1	0.0111588	0.625935	0.988205
HBEGF	-0.0208902	0.626463	0.988205
CSF3R	0.00885105	0.626683	0.988205
IFNL1	0.0127533	0.627205	0.988205
CELA3A	0.0158476	0.627323	0.988205
SMNDC1	-0.0171879	0.628051	0.988205
DENND2B	0.01446	0.628774	0.988205
ICA1	0.0228454	0.630076	0.988205
SLC4A1	-0.0133136	0.630485	0.988205
ESPL1	-0.0163593	0.630605	0.988205
TNFSF14	-0.0162066	0.631022	0.988205
DAB2	0.031507	0.631586	0.988205
TXNDC9	0.0148255	0.631743	0.988205
LEO1	0.00881813	0.632225	0.988205
HIP1	0.00949563	0.63236	0.988205
IDO1	-0.018156	0.632488	0.988205
AFAP1	0.0234811	0.632536	0.988205
RABGAP1L	-0.0174449	0.633391	0.988205
LMOD1	-0.00974526	0.633559	0.988205
GUCY2C	-0.0233361	0.634007	0.988205
SERPINE2	0.0177278	0.634423	0.988205
PDGFA	-0.0200504	0.634756	0.988205
ARF6	0.0289579	0.635269	0.988205
VEGFB	0.00820116	0.635605	0.988205
RAB33A	-0.0184404	0.636144	0.988205
DBN1	0.0142465	0.636416	0.988205
CYB5R2	-0.0153252	0.636987	0.988205
LIF	-0.014115	0.638123	0.988205
CHEK2	0.00927657	0.638452	0.988205
DAPP1	-0.0330775	0.639079	0.988205
ASRGL1	-0.0280578	0.639613	0.988205
REG3G	-0.01086	0.639907	0.988205
PMS1	0.0137875	0.639966	0.988205
UPK3BL1	-0.0153835	0.640694	0.988205
APOL1	-0.0169632	0.640955	0.988205
NCR1	-0.0101079	0.640977	0.988205
SPINK8	0.0101421	0.641436	0.988205
ACP1	-0.0122253	0.642094	0.988205
SPART	-0.021187	0.642142	0.988205
SRPK2	0.0230605	0.642776	0.988205
BRAP	-0.0296795	0.642777	0.988205
CCL2	-0.0145473	0.642846	0.988205
LYZL2	0.00953369	0.643125	0.988205
LMOD2	0.0169245	0.643186	0.988205
SERPINB9	-0.00906259	0.643838	0.988205
GDNF	-0.0103917	0.644091	0.988205
DNM3	-0.0148914	0.644245	0.988205
GFOD2	-0.0339334	0.644325	0.988205
FXYD5	-0.0179895	0.644356	0.988205
AMPD3	-0.0201684	0.644581	0.988205
CA12	-0.00840454	0.644964	0.988205
FGFR2	0.00586799	0.645037	0.988205
ATP1B2	0.00874713	0.645311	0.988205
COL15A1	-0.00746926	0.646256	0.988205
FARSA	-0.0185119	0.646498	0.988205
KYAT1	0.0154223	0.646564	0.988205
ABCA2	0.00972664	0.64662	0.988205
FOLR3	-0.0498915	0.646885	0.988205
CBLN4	0.00829495	0.646903	0.988205
DNAJB1	0.0238328	0.647132	0.988205
EGFR	0.00430697	0.64755	0.988205
ZBTB17	-0.0111839	0.647609	0.988205
PRDX1	-0.0236299	0.648403	0.988205
S100A13	0.00929645	0.648615	0.988205
ASAH1	-0.0124555	0.64924	0.988205
CHAC2	-0.0168158	0.649338	0.988205
STEAP4	0.0200177	0.649942	0.988205
THAP12	0.0238892	0.650215	0.988205
BLVRB	-0.0183163	0.650955	0.988205
CNTN5	0.0101626	0.651137	0.988205
DNMBP	0.0164966	0.652182	0.988205
IL13RA2	0.00749438	0.652691	0.988205
NFE2	-0.0200023	0.653063	0.988205
TACC3	-0.0307921	0.653347	0.988205
SMTN	-0.0254362	0.653896	0.988205
SCRIB	0.0243337	0.654253	0.988205
TNFAIP8L2	-0.0166384	0.654625	0.988205
AMY2B	-0.013391	0.655024	0.988205
CA1	-0.0169539	0.655573	0.988205
TAP1	0.0156414	0.655774	0.988205
COPB2	0.0110644	0.656995	0.988205
PARD3	0.0195649	0.657075	0.988205
LAT	0.0198733	0.657784	0.988205
NOS2	-0.0102165	0.658066	0.988205
CLSPN	-0.00870296	0.658095	0.988205
GRN	0.00615233	0.658206	0.988205
GPI	0.0121954	0.658448	0.988205
ARHGAP5	-0.0202357	0.658696	0.988205
TF	0.00544679	0.659322	0.988205
EIF4EBP1	-0.0172351	0.659933	0.988205
CHMP1A	0.0201392	0.659975	0.988205
CANT1	0.00529828	0.660323	0.988205
RANGAP1	0.0126426	0.660486	0.988205
IL17F	-0.0204688	0.660595	0.988205
PQBP1	-0.0145609	0.660729	0.988205
VSIG4	0.0108629	0.661159	0.988205
MITD1	0.0248331	0.661755	0.988205
UFD1	0.0355332	0.661783	0.988205
DPP10	0.00894878	0.661812	0.988205
F3	-0.00708449	0.661906	0.988205
NRP2	-0.00726384	0.661931	0.988205
COL6A3	-0.00951441	0.662025	0.988205
PER3	-0.0302475	0.662504	0.988205
PHLDB2	0.0242099	0.662526	0.988205
TMED10	0.0129499	0.662575	0.988205
SYAP1	0.0144879	0.662982	0.988205
NOTCH2	-0.00539712	0.663287	0.988205
FGF23	0.0135338	0.66496	0.988205
GC	-0.00653524	0.665022	0.988205
LAIR1	-0.0101108	0.665659	0.988205
FAM13A	0.016882	0.665856	0.988205
OGFR	-0.00839696	0.666261	0.988205
CAMSAP1	-0.0275862	0.666388	0.988205
CD101	-0.0106191	0.666401	0.988205
TNFRSF17	-0.0103771	0.666569	0.988205
CDC42BPB	-0.0263799	0.666749	0.988205
UBXN1	-0.0175559	0.666925	0.988205
TSPAN15	-0.0129057	0.667379	0.988205
MYH4	-0.0117202	0.667465	0.988205
ABRAXAS2	0.0168289	0.667563	0.988205
FGF12	-0.0118729	0.668281	0.988205
TPT1	0.0164054	0.668923	0.988205
SCGN	0.0112414	0.669189	0.988205
EPHA10	0.016289	0.66954	0.988205
KIR2DL3	0.0196225	0.669708	0.988205
SPRR1B	-0.0209571	0.670072	0.988205
BMP4	-0.0111061	0.670108	0.988205
GIT1	-0.0246682	0.670137	0.988205
FOXJ3	0.0110159	0.670534	0.988205
SERPINB6	0.0147427	0.671473	0.988205
TSC1	-0.0184004	0.671593	0.988205
SOWAHA	-0.0126414	0.67215	0.988205
BABAM1	0.00700822	0.672481	0.988205
RETN	-0.0105533	0.672657	0.988205
CTRC	-0.015675	0.673458	0.988205
GCLM	-0.0118844	0.673484	0.988205
SAG	-0.0127218	0.673508	0.988205
ARL2BP	0.0101295	0.674661	0.988205
SDK2	0.00920886	0.674793	0.988205
CCL3	0.0151408	0.674924	0.988205
CTF1	0.0204668	0.675344	0.988205
NECAP2	-0.0167356	0.676063	0.988205
DLL4	0.0207287	0.676137	0.988205
ACYP1	-0.0165206	0.676241	0.988205
DCN	-0.00546413	0.67626	0.988205
TIMP2	0.00625057	0.676516	0.988205
DOK1	-0.0332535	0.676764	0.988205
MMP1	-0.0226644	0.676983	0.988205
TACSTD2	-0.00775055	0.6777	0.988205
ITPA	0.0164	0.677777	0.988205
IL16	0.0102617	0.678239	0.988205
PI3	-0.0133824	0.678958	0.988205
PCDH7	-0.00822418	0.679509	0.988205
ATXN10	0.0173867	0.679982	0.988205
ZNRD2	0.0168888	0.68008	0.988205
[truncated: 916 more rows]

[truncated: 12 more sheets: S11. UKB menoage HT adj, S12. UKB menoage in HT, S13. UKB menoage in no HT, S14. UKB menoage med adj, S15. UKB menoage APOE4 adj, S16. UKB menoage 65, S17. UKB dementia, S18. UKB dem sex diffs, S19. UKB GMV, S20. UKB WMH, S21. UKB FA, S22. Data fields in UKB MRI]
